# Supplementary material
Source: Elsevier journal article supplement (https://www.sciencedirect.com/science/article/pii/S0300289617300844)
Supplement: mmc1 [file S0300289617300844:mmc1.pdf]

# Guía Española de la EPOC: GesEPOC 2017. Evaluación de la evidencia y recomendaciones. Preguntas PICO

## Tratamiento broncodilatador de larga duración en monoterapia

### P11. Pregunta para responder:

En los pacientes con EPOC estable, ¿se recomienda la administración de un tratamiento broncodilatador de larga duración tipo LAMA frente a un broncodilatador de larga duración tipo LABA?

Se identificó una revisión sistemática (RS) clave<sup>1</sup> que compara el tratamiento con un agente broncodilatador antimuscarínico de larga duración (LAMA) frente a los broncodilatadores beta-2-agonistas de larga duración (LABA), en pacientes con EPOC estable.

En la RS se identificaron 7 ensayos clínicos aleatorizados (ECA); para nuestro análisis seleccionamos 5 de estos estudios (Brusco et al [2003]<sup>2</sup> [reporta 2 ECA], Vogelmeier et al [2008]<sup>3</sup>, Donohue et al [2010]<sup>4</sup> y Vogelmeier et al [2011]<sup>5</sup>). Los 2 restantes se excluyeron por tener un seguimiento menor a 6 meses. Posteriormente identificamos 2 estudios que se añaden al análisis (Bateman et al [2013]<sup>6</sup> y Decra-

mer et al [2013]<sup>7</sup>). La mayoría (5 de 7) eran estudios de doble ciego, mientras que Donohue et al (2010) y Vogelmeier et al (2008) no estaban cegados para el tiotropio.

En todos los estudios, el LAMA evaluado fue el tiotropio, mientras que los LABA evaluados fueron el indacaterol<sup>4,6,7</sup>, el formoterol<sup>3</sup> o el salmeterol<sup>2,5</sup>.

Estos estudios incluyen pacientes con EPOC entre moderada y grave (o muy grave), pero estables clínicamente. Algunos estudios consideran el número de exacerbaciones como criterio de inclusión. En estos, se requería el antecedente de 1 o 2 exacerbaciones entre moderadas y graves el último año<sup>5,7</sup>. El tiempo de seguimiento fue de entre 24 y 52 semanas.

El porcentaje de pacientes que hacía uso de corticoides inhalados durante la intervención es variable entre estudios, pero similar entre los grupos intervención y control. Así, este porcentaje era del 12<sup>2</sup>, 30<sup>4</sup>, 42<sup>3</sup>, 53<sup>5</sup> y 70%<sup>7</sup>.

### RESULTADOS

#### Prueba funcional respiratoria: FEV<sub>1</sub>

Calidad alta

En el análisis conjunto de los datos (3 ECA, 4.449 pacientes), el tratamiento con tiotropio no muestra diferencias significativas en la función pulmonar medida por el flujo espiratorio máximo durante el primer segundo (FEV<sub>1</sub>) respecto al tratamiento con LABA (diferencia media: 20 ml [IC del 95%, 0-40 ml]).

La confianza en este estimador es alta, aunque no se excluye un efecto clínicamente irrelevante.

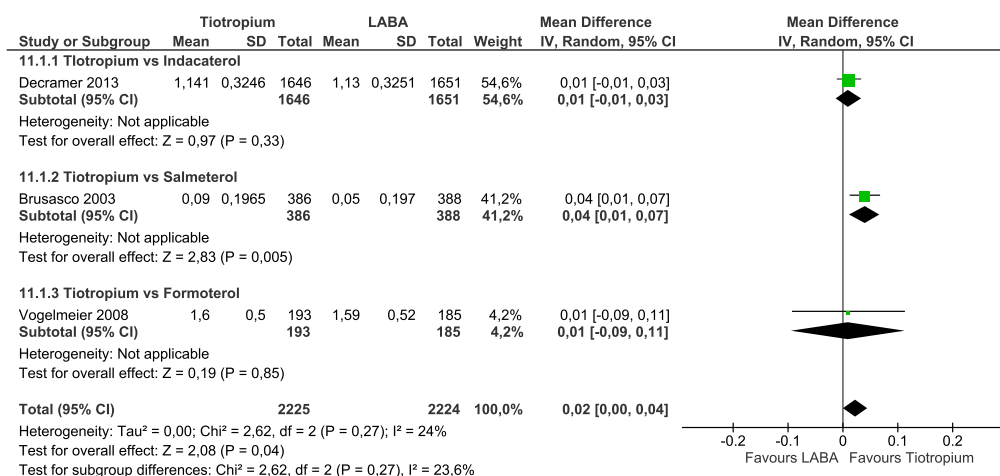

Figura 1. Resultados en relación con el FEV<sub>1</sub>.

Exacerbación de la EPOC: pacientes con al menos 1 exacerbación moderada o grave

Calidad moderada

En el análisis conjunto de los datos (5 ECA, 12.642 pacientes), el tratamiento con tiotropio mostró un menor porcentaje de pacientes que presentaron exacerbaciones respecto a los que recibieron un broncodilatador del tipo LABA (riesgo relativo [RR]: 0,89 [0,85-0,94]). En Donohue et al (2010)<sup>4</sup> se presentó mayor número de pacientes con exacerbaciones en los tratados con tiotropio (RR: 1,20 [0,94-1,54]) comparado con indacaterol, lo que muestra un resultado contrario al

de los demás estudios. En el análisis conjunto, la inclusión de este estudio explica toda la variabilidad de los resultados y los influencia de forma destacable. No se puede descartar que los resultados estuvieran sesgados por la naturaleza abierta del estudio. Los resultados representan el análisis de sensibilidad sin la inclusión de este estudio. La confianza en este estimador es moderada debido a su imprecisión, según se incluyan o no los resultados de Donohue et al (2010)<sup>4</sup>.

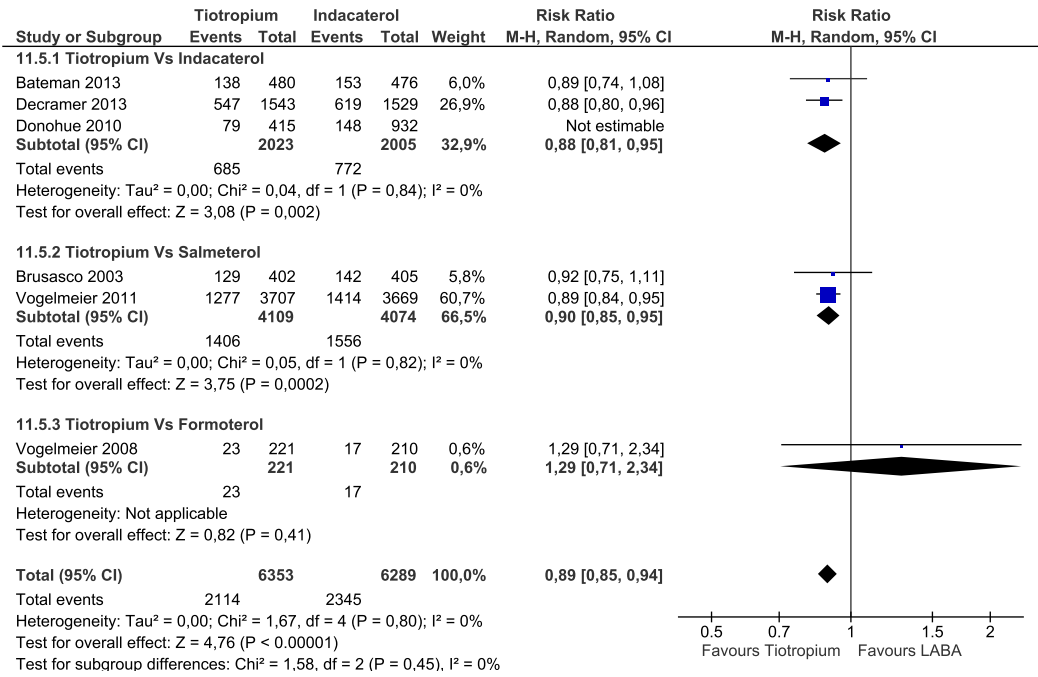

Figura 2. Resultados en relación con al menos una exacerbación moderada o grave.

Exacerbación de la EPOC: tiempo hasta la primera exacerbación

Calidad alta

Solo 2 ECA han considerado este desenlace. El tratamiento con tiotropio reduce de forma significativa la probabilidad de presentar una exacerbación a lo largo del tiempo en comparación con los pacientes que recibieron LABA (hazard ratio (HR): 0,84 [0,78-0,89]). La confianza en este estimador es alta; el tamaño de la muestra fue suficientemente grande como para proporcionar una respuesta preci-

sa. Ambos estudios se caracterizaron por tener como criterio de inclusión pacientes con el antecedente de un mínimo de una exacerbación entre moderada y grave durante el año previo, y comprendieron pacientes que requerían el uso concomitante de corticoides inhalados en más del 50% en cada grupo.

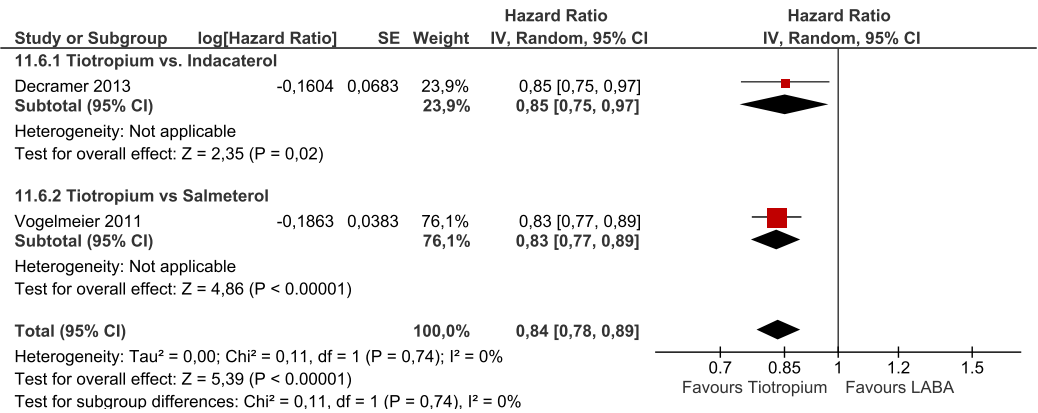

Figura 3. Resultados en relación con el tiempo hasta la primera exacerbación.

Calidad de vida: puntuación en la escala SGRQ

Calidad moderada

El Saint George's Respiratory Questionnaire (SGRQ) arroja puntuaciones entre 0 y 100; puntuaciones más altas indican más limitaciones. En el análisis conjunto de los datos (5 ECA, 12.475 pacientes), el tratamiento con tiotropio no muestra diferencias en la puntuación fi-

nal de la escala de calidad de vida respecto al tratamiento con un agente LABA (diferencia media: 0,54 [-0,57 a 1,67]). La confianza en este estimador es moderada por la inconsistencia entre los resultados de los estudios.

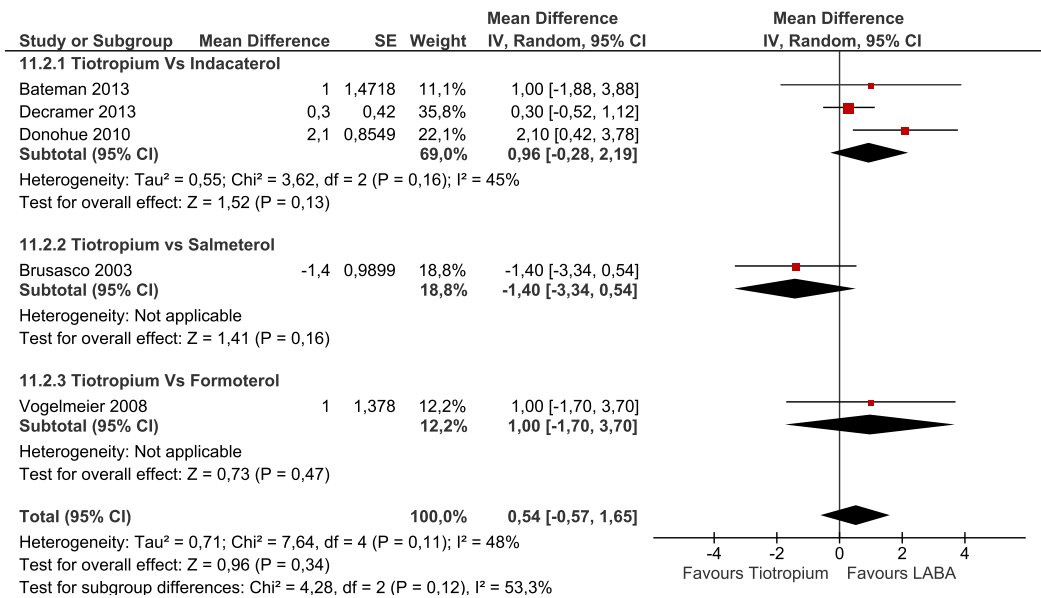

Figura 4. Resultados en relación con la puntuación en la escala SGRQ.

Calidad de vida: porcentaje de pacientes con un mínimo de 4 puntos de mejoría en la escala de calidad de vida SGRQ

Calidad moderada

Tiotropio frente a indacaterol

En el análisis conjunto de los datos (2 ECA, 2.028 pacientes), el tratamiento con tiotropio no mostró diferencias en el porcentaje de pacientes con una mejoría  $\geq 4$  puntos en la escala de calidad de vida respecto al indacaterol (RR: 0,95 [0,86-1,04]). La confianza en este estimador es moderada por la imprecisión de los resultados.

Tiotropio frente a salmeterol

En el análisis del estudio en 371 pacientes, el tratamiento con tiotropio no muestra diferencias en la proporción de pacientes con mejoría significativa en la calidad de vida comparado con el salmeterol. La confianza en este estimador es moderada por la imprecisión de los resultados (RR: 1,13 [0,97-1,31]). Se observa una alta inconsistencia entre estas comparaciones, por lo que se decidió no hacer el análisis conjunto.

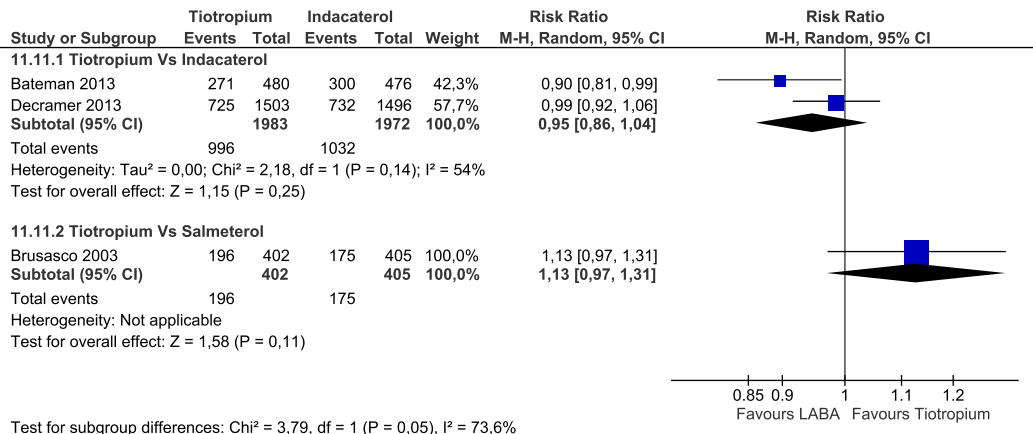

Test for subgroup differences:  $\chi^2 = 3,79$ ,  $df = 1$  ( $P = 0,05$ ),  $I^2 = 73,6\%$

Figura 5. Resultados en relación con el porcentaje de pacientes con un mínimo de 4 puntos de mejoría en la escala de calidad de vida SGRQ.

Disnea: mejoría en la puntuación del índice de disnea transicional

Calidad alta

Tiotropio frente a indacaterol

En el estudio, el tratamiento con tiotropio no muestra diferencias significativas en la puntuación final del índice de disnea transicional

(TDI) respecto al indacaterol (diferencia media: -0,18 [-0,41 a 0,05]). La confianza en este estimador es alta.

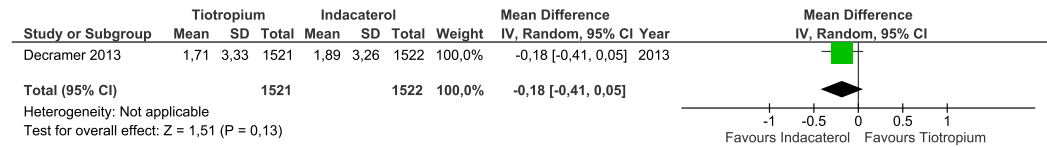

Figura 6. Resultados en relación con la mejoría en la puntuación del índice de disnea transicional.

Disnea: pacientes con una mejoría en la puntuación del índice de disnea transicional > 1

Calidad moderada

En el análisis conjunto de los datos (3 ECA, 4.626 pacientes), el tratamiento con tiotropio no muestra diferencias en el porcentaje de pacientes con una mejoría significativa en la disnea comparado con el LABA (RR: 0,97 [0,92-1,03]).

La confianza en este estimador es moderada por la imprecisión de los resultados.

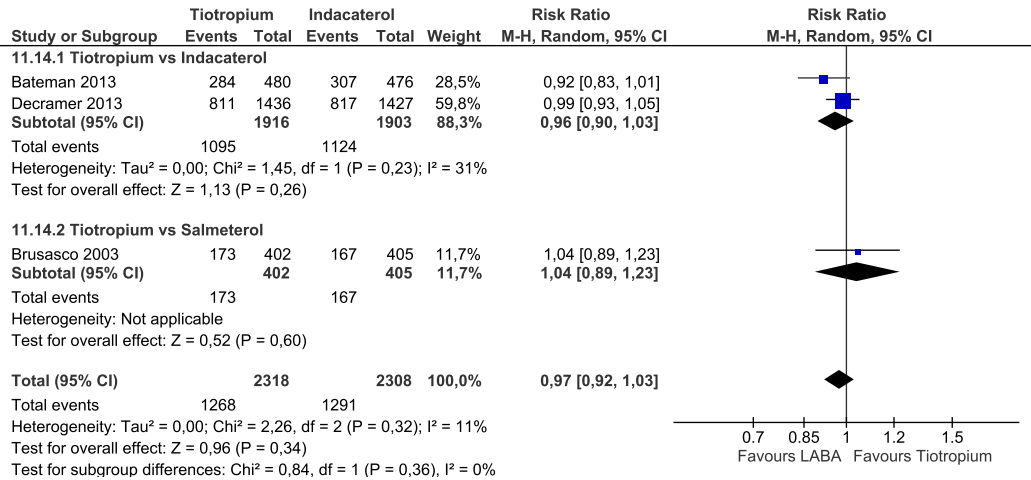

Figura 7. Resultados en relación con los pacientes con una mejoría en la puntuación del índice de disnea transicional > 1.

EFFECTOS ADVERSOS

Efectos adversos graves

Calidad moderada

En el análisis conjunto de los datos (5 ECA, 13.449 pacientes), el tratamiento con tiotropio no muestra diferencias en el porcentaje de pacientes con efectos adversos graves comparado con los broncodilatadores tipo LABA (RR: 0,92 [0,84-1]). A pesar de ello, se observa cierta

tendencia a favor del tiotropio, con menos eventos adversos en este grupo.

La confianza en este estimador es moderada por la imprecisión de los resultados.



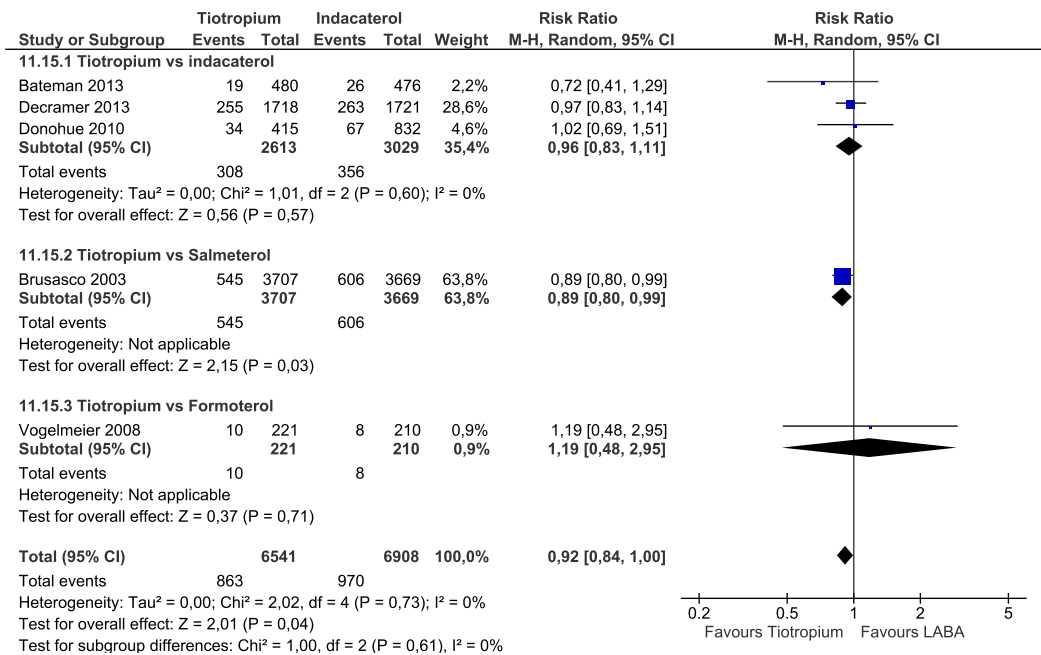

Figura 8. Resultados en relación con los efectos adversos graves.

|            |                  |
|------------|------------------|
| Mortalidad | Calidad moderada |
|------------|------------------|

En el análisis conjunto de los datos (6 ECA, 14.256 pacientes), el tratamiento con tiotropio no muestra diferencias en la mortalidad respecto a los LABA (RR: 0,88 [0,62-1,26]).

La confianza en este estimador es moderada por la imprecisión de los resultados.

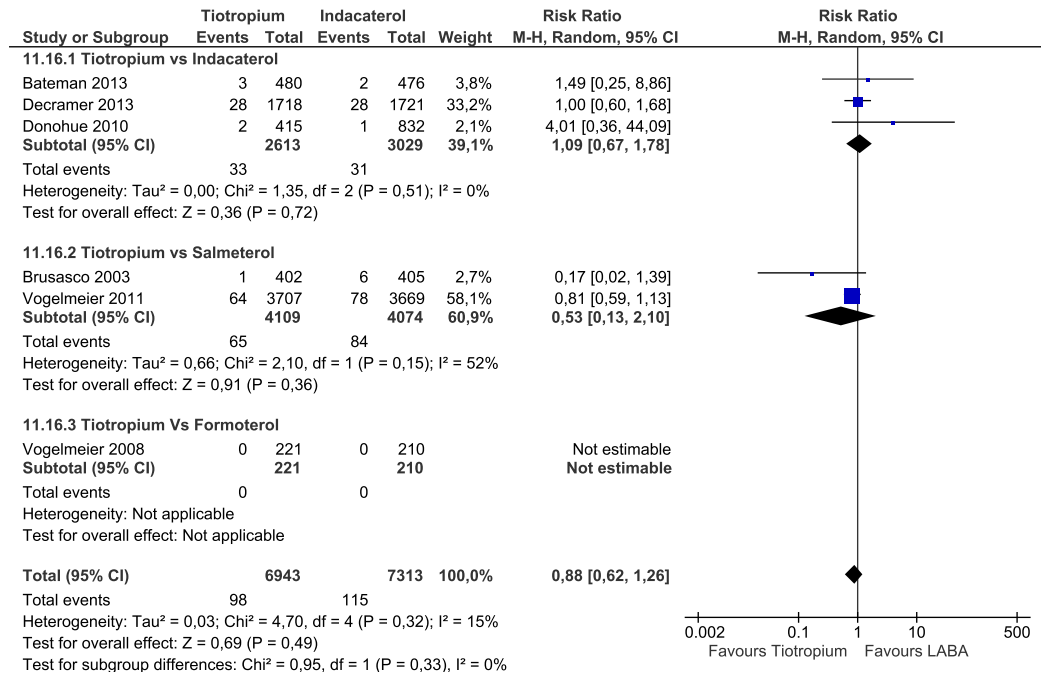

Figura 9. Resultados en relación con la mortalidad.

| Balance riesgo/beneficio                                                                                                                                                                                                                                                                                                                                                                                                                                                                                                                                      |                            |                              |                                 |                               | Calidad moderada                                                                                                                                                                                                                                                                                                                                                                                                              |
|---------------------------------------------------------------------------------------------------------------------------------------------------------------------------------------------------------------------------------------------------------------------------------------------------------------------------------------------------------------------------------------------------------------------------------------------------------------------------------------------------------------------------------------------------------------|----------------------------|------------------------------|---------------------------------|-------------------------------|-------------------------------------------------------------------------------------------------------------------------------------------------------------------------------------------------------------------------------------------------------------------------------------------------------------------------------------------------------------------------------------------------------------------------------|
| <p>El tratamiento de larga duración con tiotropio en monoterapia en pacientes con EPOC moderada-grave ha demostrado disminuir la frecuencia de exacerbaciones y su probabilidad de ocurrencia a lo largo del tiempo en comparación con los broncodilatadores betaagonistas. Este efecto podría ser más evidente en pacientes con antecedente de exacerbaciones frecuentes que, además, requieran habitualmente el uso de corticoides inhalados (2 estudios incluyen pacientes con uso concomitante de corticoides inhalados en más del 50% de los casos).</p> |                            |                              |                                 |                               | <p>El tratamiento con tiotropio no ha demostrado mejorar los parámetros de función pulmonar o la disnea asociada, ni mejorar los resultados en la calidad de vida. En la frecuencia de efectos adversos, no ha mostrado diferencias ni en los efectos adversos graves ni en la mortalidad.</p> <p>La confianza global en algunos estimadores ha sido limitada por diferencias en los resultados en algunas comparaciones.</p> |
| Recomendaciones                                                                                                                                                                                                                                                                                                                                                                                                                                                                                                                                               |                            |                              |                                 |                               | Débil a favor                                                                                                                                                                                                                                                                                                                                                                                                                 |
| <p>En pacientes con EPOC que precisan un broncodilatador de larga duración en monoterapia se recomienda el tratamiento con un LAMA.</p> <p><b>Especificaciones:</b> La evidencia analizada se basa en una mayor prevención de agudizaciones en estudios realizados con el LAMA tiotropio. En pacientes sin agudizaciones, no hay diferencias en la eficacia clínica entre un LAMA y un LABA.</p>                                                                                                                                                              |                            |                              |                                 |                               |                                                                                                                                                                                                                                                                                                                                                                                                                               |
| Tabla 11.1. Resumen de los estudios comparativos entre tiotropio y LABA para la EPOC                                                                                                                                                                                                                                                                                                                                                                                                                                                                          |                            |                              |                                 |                               |                                                                                                                                                                                                                                                                                                                                                                                                                               |
| Outcomes                                                                                                                                                                                                                                                                                                                                                                                                                                                                                                                                                      | Interventions              | Nº of participants (studies) | Quality of the evidence (GRADE) | Relative effect (95% CI)      | Anticipated absolute effects                                                                                                                                                                                                                                                                                                                                                                                                  |
|                                                                                                                                                                                                                                                                                                                                                                                                                                                                                                                                                               |                            |                              |                                 |                               | Risk difference with Tiotropium                                                                                                                                                                                                                                                                                                                                                                                               |
| Trough FEV <sub>1</sub>                                                                                                                                                                                                                                                                                                                                                                                                                                                                                                                                       | Tiotropium vs. LABA        | 4449 (3 RCTs)                | ⊕⊕⊕⊕ HIGH                       | -                             | MD <b>0.02 L more</b> (0 to 0.04 more)                                                                                                                                                                                                                                                                                                                                                                                        |
|                                                                                                                                                                                                                                                                                                                                                                                                                                                                                                                                                               | Tiotropium vs. Indacaterol | 3297 (1 RCT)                 |                                 | -                             | MD <b>0.01 L more</b> (0.01 fewer to 0.03 more)                                                                                                                                                                                                                                                                                                                                                                               |
|                                                                                                                                                                                                                                                                                                                                                                                                                                                                                                                                                               | Tiotropium vs. Salmeterol  | 774 (1 RCT)                  |                                 | -                             | MD <b>0.04 L more</b> (0.01 more to 0.07 more)                                                                                                                                                                                                                                                                                                                                                                                |
|                                                                                                                                                                                                                                                                                                                                                                                                                                                                                                                                                               | Tiotropium vs. Formoterol  | 378 (1 RCT)                  |                                 | -                             | MD <b>0.01 L more</b> (0.09 fewer to 0.11 more)                                                                                                                                                                                                                                                                                                                                                                               |
| Patients with one or more exacerbations (excluding Donohue 2010)                                                                                                                                                                                                                                                                                                                                                                                                                                                                                              | Tiotropium vs. LABA        | 12642 (5 RCTs)               | ⊕⊕⊕○ MODERATE                   | RR <b>0.89</b> (0.85 to 0.94) | <b>41 fewer per 1000</b> (56 fewer to 22 fewer)                                                                                                                                                                                                                                                                                                                                                                               |
|                                                                                                                                                                                                                                                                                                                                                                                                                                                                                                                                                               | Tiotropium vs. Indacaterol | 4028 (2 RCTs)                |                                 | RR <b>0.88</b> (0.81 to 0.95) | <b>46 fewer per 1000</b> (73 fewer to 19 fewer)                                                                                                                                                                                                                                                                                                                                                                               |
|                                                                                                                                                                                                                                                                                                                                                                                                                                                                                                                                                               | Tiotropium vs. Salmeterol  | 8183 (2 RCTs)                |                                 | RR <b>0.90</b> (0.85 to 0.95) | <b>38 fewer per 1000</b> (57 fewer to 19 fewer)                                                                                                                                                                                                                                                                                                                                                                               |
|                                                                                                                                                                                                                                                                                                                                                                                                                                                                                                                                                               | Tiotropium vs. Formoterol  | 431 (1 RCT)                  |                                 | RR <b>1.29</b> (0.71 to 2.34) | <b>23 more per 1000</b> (23 fewer to 108 more)                                                                                                                                                                                                                                                                                                                                                                                |
| Time to first moderate or severe exacerbation                                                                                                                                                                                                                                                                                                                                                                                                                                                                                                                 | Tiotropium vs. LABA        | (2 RCTs)                     | ⊕⊕⊕⊕ HIGH                       | HR <b>0.84</b> (0.78 to 0.89) |                                                                                                                                                                                                                                                                                                                                                                                                                               |
| SGRQ total score                                                                                                                                                                                                                                                                                                                                                                                                                                                                                                                                              | Tiotropium vs. LABA        | 12475 (5 RCTs)               | ⊕⊕⊕○ MODERATE <sup>1</sup>      | -                             | MD <b>0.54 points more</b> (0.57 fewer to 1.65 more)                                                                                                                                                                                                                                                                                                                                                                          |
|                                                                                                                                                                                                                                                                                                                                                                                                                                                                                                                                                               | Tiotropium vs. Indacaterol | (3 RCTs)                     |                                 | -                             | MD <b>0.96 points more</b> (0.28 fewer to 2.19 more)                                                                                                                                                                                                                                                                                                                                                                          |
|                                                                                                                                                                                                                                                                                                                                                                                                                                                                                                                                                               | Tiotropium vs. Salmeterol  | (1 RCT)                      |                                 | -                             | MD <b>1.4 lower</b> (3.34 lower to 0.54 higher)                                                                                                                                                                                                                                                                                                                                                                               |
|                                                                                                                                                                                                                                                                                                                                                                                                                                                                                                                                                               | Tiotropium vs. Formoterol  | (1 RCT)                      |                                 | -                             | MD <b>1 points more</b> (1.7 fewer to 3.7 more)                                                                                                                                                                                                                                                                                                                                                                               |
| Patients with ≥ 4 points in SGRQ improvement                                                                                                                                                                                                                                                                                                                                                                                                                                                                                                                  | Tiotropium vs. Indacaterol | 3955 (2 RCTs)                | ⊕⊕⊕○ MODERATE <sup>1</sup>      | RR <b>0.95</b> (0.86 to 1.04) | <b>26 fewer per 1000</b> (73 fewer to 21 more)                                                                                                                                                                                                                                                                                                                                                                                |
|                                                                                                                                                                                                                                                                                                                                                                                                                                                                                                                                                               | Tiotropium vs. Salmeterol  | 807 (1 RCT)                  | ⊕⊕⊕○ MODERATE <sup>1</sup>      | RR <b>1.13</b> (0.97 to 1.31) | <b>56 more per 1000</b> (13 fewer to 134 more)                                                                                                                                                                                                                                                                                                                                                                                |
| TDI total score change from baseline at week 12                                                                                                                                                                                                                                                                                                                                                                                                                                                                                                               | Tiotropium vs. Indacaterol | 3043 (1 RCT)                 | ⊕⊕⊕⊕ HIGH                       | -                             | MD <b>0.18 points fewer</b> (0.41 fewer to 0.05 more)                                                                                                                                                                                                                                                                                                                                                                         |
| TDI score improvement ≥ 1 point                                                                                                                                                                                                                                                                                                                                                                                                                                                                                                                               | Tiotropium vs. LABA        | 4626 (3 RCTs)                | ⊕⊕⊕○ MODERATE <sup>1</sup>      | RR <b>0.97</b> (0.92 to 1.03) | <b>17 fewer per 1000</b> (45 fewer to 17 more)                                                                                                                                                                                                                                                                                                                                                                                |
|                                                                                                                                                                                                                                                                                                                                                                                                                                                                                                                                                               | Tiotropium vs. Indacaterol | 3819 (2 RCTs)                |                                 | RR <b>0.96</b> (0.90 to 1.03) | <b>24 fewer per 1000</b> (59 fewer to 18 more)                                                                                                                                                                                                                                                                                                                                                                                |
|                                                                                                                                                                                                                                                                                                                                                                                                                                                                                                                                                               | Tiotropium vs. Salmeterol  | 807 (1 RCT)                  |                                 | RR <b>1.04</b> (0.89 to 1.23) | <b>16 more per 1000</b> (45 fewer to 95 more)                                                                                                                                                                                                                                                                                                                                                                                 |

Tabla 11.1. Resumen de los estudios comparativos entre tiotropio y LABA para la EPOC (cont.)

| Outcomes          | Interventions              | Nº of participants (studies) | Quality of the evidence (GRADE) | Relative effect (95% CI) | Anticipated absolute effects            |
|-------------------|----------------------------|------------------------------|---------------------------------|--------------------------|-----------------------------------------|
|                   |                            |                              |                                 |                          | Risk difference with Tiotropium         |
| Patients with SAE | Tiotropium vs. LABA        | 13449 (5 RCTs)               | ⊕⊕⊕⊙<br>MODERATE <sup>1</sup>   | RR 0.92 (0.84 to 1.00)   | 11 fewer per 1000 (22 fewer to 0 fewer) |
|                   | Tiotropium vs. Indacaterol | 5642 (3 RCTs)                |                                 | RR 0.96 (0.83 to 1.11)   | 5 fewer per 1000 (20 fewer to 13 more)  |
|                   | Tiotropium vs. Salmeterol  | 7376 (1 RCT)                 |                                 | RR 0.89 (0.80 to 0.99)   | 18 fewer per 1000 (33 fewer to 2 fewer) |
|                   | Tiotropium vs. Formoterol  | 431 (1 RCT)                  |                                 | RR 1.19 (0.48 to 2.95)   | 7 more per 1000 (20 fewer to 74 more)   |
| Overall mortality | Tiotropium vs. LABA        | 14256 (6 RCTs)               | ⊕⊕⊕⊙<br>MODERATE <sup>1</sup>   | RR 0.88 (0.62 to 1.26)   | 2 fewer per 1000 (6 fewer to 4 more)    |
|                   | Tiotropium vs. Indacaterol | 5642 (3 RCTs)                |                                 | RR 1.09 (0.67 to 1.78)   | 1 more per 1000 (3 fewer to 8 more)     |
|                   | Tiotropium vs. Salmeterol  | 8183 (2 RCTs)                |                                 | RR 0.53 (0.13 to 2.10)   | 10 fewer per 1000 (18 fewer to 23 more) |
|                   | Tiotropium vs. Formoterol  | 431 (1 RCT)                  |                                 | not estimable            | 0 fewer per 1000 (0 fewer to 0 fewer)   |

1. One of the 95% CI crosses or is near the zero effect zone.

Referencias

1. Chong J, Karner C, Poole P. Tiotropium versus long-acting beta-agonists for stable chronic obstructive pulmonary disease. *Cochrane Database Syst Rev*. 2012;(9):CD009157.

2. Brusasco V, Hodder R, Miravittles M, Korducki L, Towse L, Kesten S. Health outcomes following treatment for six months with once daily tiotropium compared with twice daily salmeterol in patients with COPD. *Thorax*. 2003;58:399-404.

3. Vogelmeier C, Kardos P, Harari S, Gans SJ, Stenglein S, Thirlwell J. Formoterol mono- and combination therapy with tiotropium in patients with COPD: a 6-month study. *Respir Med*. 2008;102:1511-20.

4. Donohue JF, Fogarty C, Lotvall J, Mahler DA, Worth H, Yorgancioglu A, et al. Once-daily bronchodilators for chronic obstructive pulmonary disease: indacaterol versus tiotropium. *Am J Respir Crit Care Med*. 2010;182:155-62.

5. Vogelmeier C, Hederer B, Glaab T, Schmidt H, Rutten-van Mölken MP, Beeh KM, et al. Tiotropium versus salmeterol for the prevention of exacerbations of COPD. *N Engl J Med*. 2011;364:1093-103.

6. Bateman ED, Ferguson GT, Barnes N, Gallagher N, Green Y, Henley M, et al. Dual bronchodilation with QVA149 versus single bronchodilator therapy: the SHINE study. *Eur Respir J*. 2013;42:1484-94.

7. Decramer ML, Chapman KR, Dahl R, Frith P, Devouassoux G, Fritscher C, et al. Once-daily Indacaterol versus tiotropium for patients with severe chronic obstructive pulmonary disease (INVIGORATE): a randomised, blinded, parallel-group study. *Lancet Respir Med*. 2013;1:524-33.

Nota

Dos ensayos que se presentaron en un estudio preliminar se excluyeron del análisis por tener un seguimiento menor a 24 semanas:

- Buhl R, Dunn LJ, Disdier C, Lassen C, Amos C, Henley M, et al. Blinded 12-week comparison of once-daily indacaterol and tiotropium in COPD. *Eur Respir J*. 2011;38:797-803.
- Briggs DD Jr, Covelli H, Lapidus R, Bhattacharya S, Kesten S, Cassino C. Improved daytime spirometric efficacy of tiotropium compared with salmeterol in patients with COPD. *Pulm Pharmacol Ther*. 2005;18:397-404.

# Tratamiento con doble broncodilatación de larga duración frente a tratamiento broncodilatador en monoterapia

## P12. Pregunta para responder:

*En los pacientes con EPOC estable, ¿se recomienda el uso del tratamiento con doble broncodilatación de larga duración frente a un tratamiento en monoterapia?*

Se localizaron 3 revisiones sistemáticas (RS) recientes<sup>1-3</sup>. Estas RS identificaron 16 estudios primarios. Se documentaron 2 ensayos clínicos aleatorizados (ECA) adicionales con la comparación del aclidinio y el formoterol frente a sus compuestos activos por separado. Finalmente se han seleccionado 18 estudios primarios.

Las comparaciones evaluadas fueron:

Tiotropio + broncodilatadores beta-2-agonistas de larga duración (LABA) frente a tiotropio.

Tiotropio + LABA frente a LABA.

Glicopirronio + indacaterol frente a monoterapia (glicopirronio, indacaterol o tiotropio).

Umeclidinio + vilanterol frente a monoterapia (umeclidinio, vilanterol o cualquiera de los 2).

Aclidinio + formoterol frente a monoterapia (aclidinio o formoterol).

No fue posible analizar conjuntamente los resultados de doble broncodilatación frente a monoterapia para ningún desenlace, debido a que frecuentemente, dentro de un mismo estudio, se comparó la doble broncodilatación con diferentes opciones de monoterapia (p. ej., en Bateman et al [2013]<sup>4</sup>, el mismo grupo de pacientes que recibió indacaterol + glicopirronio se compara con indacaterol, glicopirronio y tiotropio).

Para el análisis de la efectividad de las diferentes intervenciones sobre las exacerbaciones solo se han considerado los 2 estudios que incluyeron pacientes con exacerbaciones previas: Wedzicha et al (2013)<sup>5</sup> y Aaron et al (2007)<sup>6</sup>, ambos con una duración del tratamiento superior a 1 año. Wedzicha et al (2013)<sup>5</sup> evaluaron el tratamiento combinado de indacaterol + glicopirronio frente a glicopirronio o tiotropio. Aaron et al (2007)<sup>6</sup> evaluaron el tratamiento combinado de tiotropio + LABA frente a tiotropio.

## RESUMEN DE RESULTADOS: DOBLE BRONCODILATACIÓN FRENTE A UN SOLO BRONCODILATADOR

### Mortalidad por todas las causas

Ninguna de las comparaciones evaluadas mostró diferencias significativas entre las 2 estrategias terapéuticas por lo que se refiere a la mortalidad por cualquier causa.

#### *Tiotropio + LABA frente a tiotropio*

Ocho ECA (87 eventos; riesgo relativo [RR]: 1,22; intervalo de confianza [IC] del 95%, 0,80-1,86; 2 pacientes más por 1.000, de 2 menos a 7 más).

Confianza en los resultados: moderada (imprecisión).

#### *Tiotropio + LABA frente a LABA*

Tres ECA (46 eventos; RR: 1,15; IC del 95%, 0,62-2,15; 2 pacientes más por 1.000, de 4 menos a 13 más).

Confianza en los resultados: moderada (imprecisión).

#### *Glicopirronio + indacaterol frente a glicopirronio*

Tres ECA (50 eventos; RR: 0,97; IC del 95%, 0,56-1,69; 0 pacientes menos por 1.000, de 7 menos a 10 más).

Confianza en los resultados: moderada (imprecisión).

#### *Glicopirronio + indacaterol frente a indacaterol*

Dos ECA (6 eventos; RR: 0,31; IC del 95%, 0,05-1,97; 3 pacientes menos por 1.000, de 5 menos a 5 más).

Confianza en los resultados: moderada (imprecisión).

#### *Glicopirronio + indacaterol frente a tiotropio*

Dos ECA (52 eventos; RR: 0,87; IC del 95%, 0,51-1,49; 3 pacientes menos por 1.000, de 11 menos a 11 más).

Confianza en los resultados: baja (imprecisión, limitaciones en el diseño).

#### *Umeclidinio + vilanterol frente a umeclidinio*

Seis ECA (16 eventos; RR: 0,49; IC del 95%, 0,20-1,22; 4 pacientes menos por 1.000, de 6 menos a 2 más).

Confianza en los resultados: moderada (imprecisión).

#### *Umeclidinio + vilanterol frente a vilanterol*

Cinco ECA (11 eventos; RR: 0,63; IC del 95%, 0,20-1,94; 2 pacientes menos por 1.000, de 4 menos a 5 más).

Confianza en los resultados: moderada (imprecisión).

#### *Umeclidinio + vilanterol frente a tiotropio*

Dos ECA (9 eventos; RR: 0,81; IC del 95%, 0,23-2,79; 1 paciente menos por 1.000, de 4 menos a 8 más).

Confianza en los resultados: moderada (imprecisión).

#### *Aclidinio + formoterol frente a aclidinio*

Dos ECA (5 eventos; RR: 0,74; IC del 95%, 0,09-5,83; 1 paciente menos por 1.000, de 4 menos a 20 más).

Confianza en los resultados: moderada (imprecisión).

#### *Aclidinio + formoterol frente a formoterol*

Dos ECA (4 eventos; RR: 0,99; IC del 95%, 0,14-7,04; 0 pacientes menos por 1.000, de 2 menos a 17 más).

Confianza en los resultados: moderada (imprecisión).

Pacientes con una o más exacerbaciones

Se identificaron 2 ECA (2.509 pacientes) que incluyeron pacientes con 1 o más exacerbaciones durante el año previo<sup>5,6</sup>, ambos con una duración de 1 año o más. Los resultados se presentan por tipo de comparación y tipo de exacerbación.

Aaron et al (2007)<sup>6</sup> compararon la doble broncodilatación con tiotropio + salmeterol frente a monoterapia con tiotropio. El estudio presenta los resultados para el número de pacientes con al menos 1 exacerbación (cualquier gravedad) y al menos 1 exacerbación grave (que requirieron hospitalización). Hasta un 40% de los pacientes abandonó el tratamiento. Los resultados representan un análisis de sensibilidad asumiendo que los pacientes que abandonaron tuvieron la misma frecuencia de exacerbaciones que los que siguieron el estudio. Los resul-

tados de esta aproximación se sitúan entre la estimación cruda y la más conservadora.

Wedzicha et al (2013)<sup>5</sup> compararon la doble broncodilatación con glicopirronio + indacaterol frente a monoterapia con glicopirronio o tiotropio (este último de forma no cegada). El estudio presenta los resultados para el número de pacientes con al menos 1 exacerbación moderada o grave.

No se mostraron diferencias significativas entre la doble broncodilatación frente a monoterapia para ninguna comparación o definición. La confianza en los resultados es moderada, debido principalmente a imprecisión.

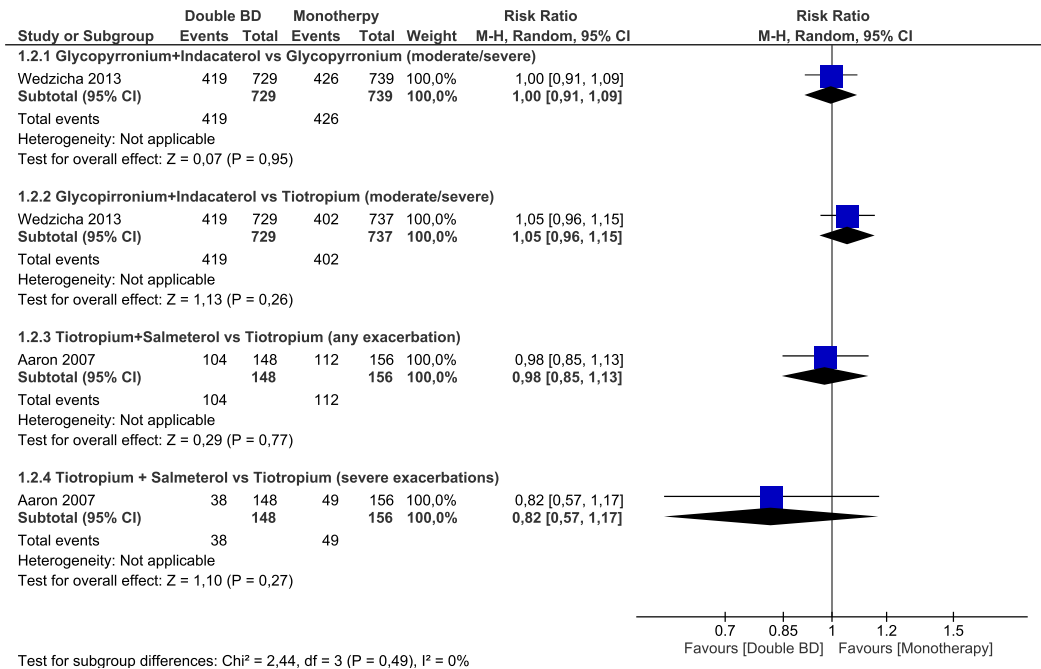

Figura 1. Resultados en relación con los pacientes con una o más exacerbaciones.

Frecuencia de las exacerbaciones (razón de tasas de incidencia, número de exacerbaciones por paciente por año)

Se identificaron 2 ECA (2.509 pacientes) que incluyeron pacientes con 1 o más exacerbaciones durante el año previo<sup>5,6</sup>, ambos con una duración de 1 año o más. Los resultados se presentan por tipo de comparación y tipo de exacerbación.

Tiotropio + LABA frente a tiotropio

Los resultados de 1 ECA (304 pacientes) no muestran diferencias significativas entre los grupos en la incidencia anualizada de exacerbaciones graves o de cualquier gravedad. La confianza en los resultados es moderada, debido principalmente a imprecisión.

Glicopirronio + indacaterol frente a glicopirronio o tiotropio

Los resultados de 1 ECA (2.205 pacientes) muestran que la combinación glicopirronio + indacaterol reduce de forma significativa la incidencia anualizada de exacerbaciones de cualquier gravedad frente a monoterapia (con glicopirronio o tiotropio). La confianza en los resultados es alta. Sin embargo, el estudio no muestra diferencias en la incidencia anualizada de exacerbaciones graves para ninguna de las comparaciones. La confianza en los resultados es moderada, debido principalmente a imprecisión.

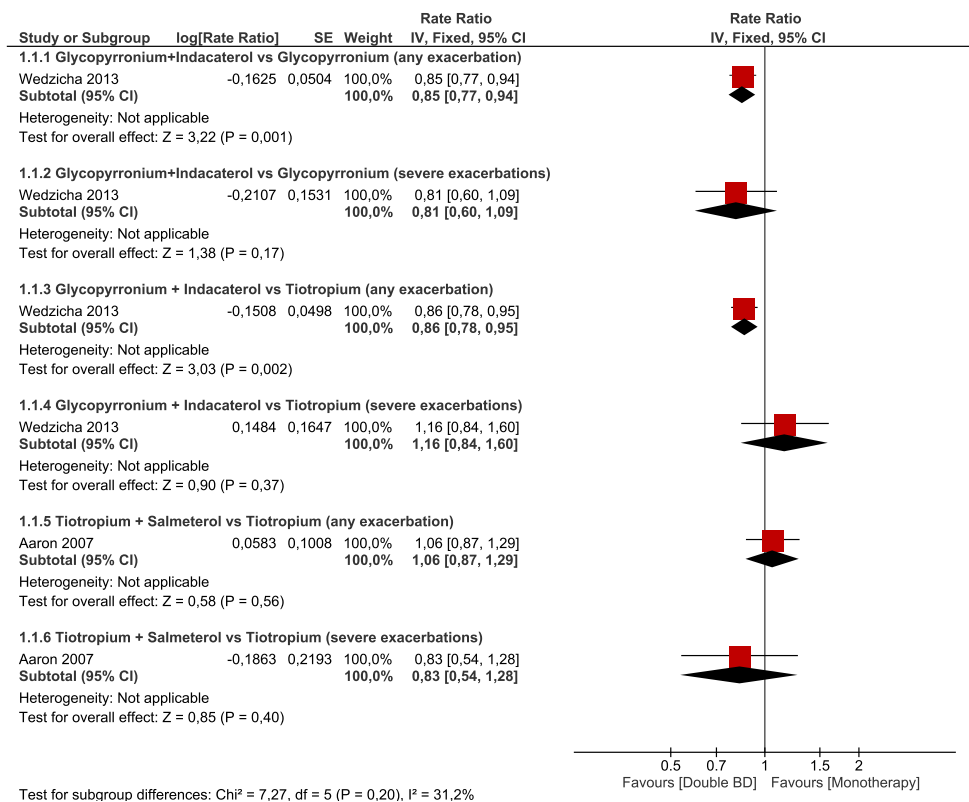

Figura 2. Resultados en relación con la frecuencia de las exacerbaciones.

Tiempo hasta la primera exacerbación

Se identificaron 2 ECA (2.509 pacientes) que incluyeron pacientes con 1 o más exacerbaciones durante el año previo<sup>5,6</sup>, ambos con una duración de 1 año o más. Los resultados se presentan por tipo de comparación.

*Tiotropio + LABA frente a tiotropio*

Los resultados de 1 ECA (304 pacientes) no muestran diferencias significativas entre los grupos en el tiempo hasta la primera exacerbación. Los resultados del estudio no se presentan ajustados. La confianza en los resultados es moderada, debido principalmente a imprecisión.

*Glicopirronio + indacaterol frente a glicopirronio o tiotropio*

Los resultados (ajustados) de 1 ECA (2.205 pacientes) no muestran diferencias significativas entre los grupos en el tiempo hasta la primera exacerbación, aunque la combinación glicopirronio + indacaterol muestra una tendencia a reducir el tiempo hasta la primera exacerbación frente a monoterapia con glicopirronio. La confianza en los resultados es moderada, debido principalmente a imprecisión.

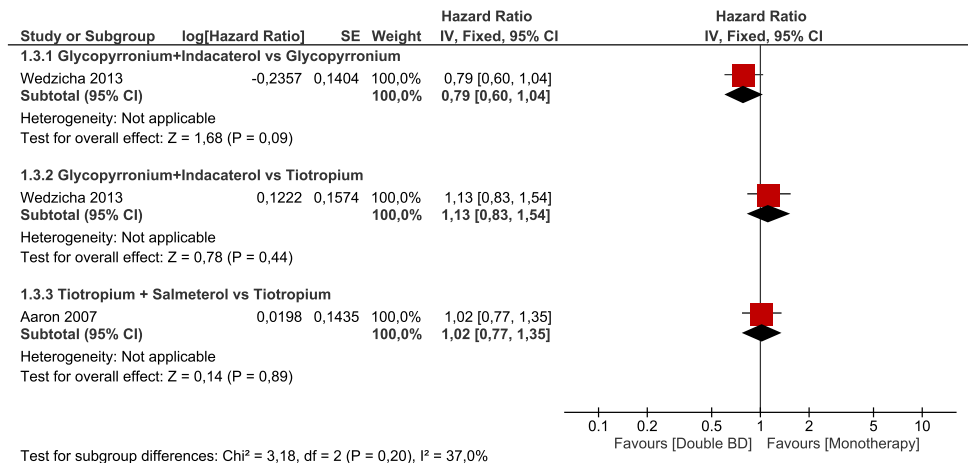

Figura 3. Resultados en relación con el tiempo hasta la primera exacerbación.

## Prueba funcional respiratoria: FEV<sub>1</sub>

Todas las comparaciones estudiadas mostraron una mejoría de la función respiratoria evaluada, como el flujo espiratorio máximo durante el primer segundo (FEV<sub>1</sub>) favorable a la combinación de 2 broncodilatadores en comparación con un solo broncodilatador. Los beneficios observados fueron clínicamente relevantes.

### *Tiotropio + LABA frente a tiotropio*

Diez ECA (9.573 pacientes; diferencia media [MD]: 0,06 l; IC del 95%, 0,05-0,07 l).

Confianza en los resultados: alta.

### *Tiotropio+ LABA frente a LABA*

Cuatro ECA (3.513 pacientes; MD: 0,07 l; IC del 95%, 0,06-0,09 l).

Confianza en los resultados: alta.

### *Glicopirronio + indacaterol frente a glicopirronio*

Un ECA (947 pacientes; MD: 0,11 l; IC del 95%, 0,06-0,16 l).

Confianza en los resultados: alta.

### *Glicopirronio + indacaterol frente a indacaterol*

Dos ECA (1.382 pacientes; MD: 0,07 l; IC del 95%, 0,04-0,10 l).

Confianza en los resultados: alta.

### *Glicopirronio + indacaterol frente a tiotropio*

Un ECA (954 pacientes; MD: 0,10 l; IC del 95%, 0,05-0,15 l).

Confianza en los resultados: moderada (limitaciones en el diseño).

### *Umeclidinio + vilanterol frente a umeclidinio*

Cuatro ECA (MD: 0,05 l; IC del 95%, 0,03-0,08 l).

Confianza en los resultados: alta.

### *Umeclidinio + vilanterol frente a vilanterol*

Cinco ECA (MD: 0,10 l; IC del 95%, 0,09-0,12 l).

Confianza en los resultados: alta.

### *Umeclidinio + vilanterol frente a tiotropio*

Cuatro ECA (MD: 0,09 l; IC del 95%, 0,07-0,11 l).

Confianza en los resultados: alta.

### *Aclidinio + formoterol frente a formoterol*

Dos ECA (MD: 0,06 l; IC del 95%, 0,02-0,10 l).

Confianza en los resultados: alta.

### *Aclidinio + formoterol frente a aclidinio*

Frente a aclidinio, la combinación 400/12 µg mostró una mejoría significativa en las semanas 1 y 4<sup>7</sup>, y hasta las 12 semanas<sup>8</sup> (ninguno de los 2 estudios aporta datos numéricos).

Confianza en los resultados: moderada (imprecisión).

## Calidad de vida: puntuaciones totales en el SGRQ

El Saint George's Respiratory Questionnaire (SGRQ) arroja puntuaciones entre 0 y 100; puntuaciones más altas indican peor calidad de vida.

Todas las comparaciones mostraron una tendencia a una mejoría en las puntuaciones de la escala SGRQ de calidad de vida favorable a la combinación de 2 broncodilatadores en comparación con un solo broncodilatador. Estas mejorías son discretas y se sitúan entre 1 y 2 puntos.

La combinación de tiotropio con un LABA mostró una mejoría estadísticamente significativa, aunque el margen superior del IC no alcanza un efecto clínicamente relevante.

Por otro lado, con la combinación de umeclidinio + vilanterol, la mejoría no es estadísticamente significativa, aunque los resultados son imprecisos y no se puede excluir la posibilidad de que puedan causar una mejoría clínicamente relevante.

### *Tiotropio + LABA frente a tiotropio*

Cinco ECA (6.709 pacientes; MD: -1,34; IC del 95%, -1,87 a -0,8).

Confianza en los resultados: alta.

### *Tiotropio + LABA frente a LABA*

Cuatro ECA (3.378 pacientes; MD: -1,25; IC del 95%, -2,14 a -0,37).

Confianza en los resultados: alta.

### *Umeclidinio + vilanterol frente a umeclidinio*

Dos ECA (MD: -2,1; IC del 95%, -4,52 a 0,31).

Confianza en los resultados: moderada (inconsistencia).

### *Umeclidinio + vilanterol frente a vilanterol*

Dos ECA (MD: -1,64; IC del 95%, -3,98 a 0,7).

Confianza en los resultados: moderada (inconsistencia).

### *Aclidinio + formoterol (400/12 µg) frente a aclidinio*

Un ECA (MD: -1,36; IC del 95%, -3,30 a 0,58).

Confianza en los resultados: moderada (imprecisión).

### *Aclidinio + formoterol (400/12 µg) frente a formoterol*

Un ECA (MD: -1,59; IC del 95%, -3,52 a 0,34).

Confianza en los resultados: moderada (imprecisión).

## Calidad de vida: número de pacientes con mejoría en 4 puntos o más en la escala SGQR

Todas las comparaciones muestran un aumento del número de pacientes con una mejoría relevante de la calidad de vida favorable a la combinación de 2 broncodilatadores en comparación con 1 solo. De todos modos, esta diferencia alcanzó la significación solo en algunas comparaciones.

### *Tiotropio + LABA frente a tiotropio*

Tres ECA (3.067 eventos; RR: 1,14; IC del 95%, 1,09-1,20; 67 pacientes más por 1.000, de 43 más a 96 más; número de pacientes que fue necesario tratar [NNT] = 14).

Confianza en los resultados: alta.



#### *Tiotropio + LABA frente a LABA*

Dos ECA (1.517 eventos; RR: 1,24; IC del 95%, 1,14-1,34; 107 pacientes más por 1.000, de 63 más a 152 más; NNT = 9).

Confianza en los resultados: alta.

#### *Glicopirronio + indacaterol frente a glicopirronio*

Un ECA (590 eventos; RR: 1,06; IC del 95%, 0,96-1,17; 36 pacientes más por 1.000, de 24 menos a 103 más).

Confianza en los resultados: moderada (imprecisión).

#### *Glicopirronio + indacaterol frente a indacaterol*

Dos ECA (834 eventos; RR: 1,09; IC del 95%, 0,92-1,30; 52 pacientes más por 1.000, de 46 menos a 173 más).

Confianza en los resultados: moderada (imprecisión).

#### *Glicopirronio + indacaterol frente a tiotropio*

Un ECA (575 eventos; RR: 1,13; IC del 95%, 1,02-1,26; 73 pacientes más por 1.000, de 11 más a 146 más; NNT = 9).

Confianza en los resultados: baja (imprecisión, limitaciones en el diseño).

#### *Umeclidinio + vilanterol frente a umeclidinio*

Un ECA (977 eventos; RR: 1,13; IC del 95%, 1,03-1,25; 51 pacientes más por 1.000, de 12 más a 99 más; NNT = 18).

Confianza en los resultados: moderada (imprecisión).

#### *Umeclidinio + vilanterol frente a vilanterol*

Tres ECA (977 eventos; RR: 1,08; IC del 95%, 0,98-1,19; 33 pacientes más por 1.000, de 8 menos a 78 más).

Confianza en los resultados: moderada (imprecisión).

#### *Umeclidinio + vilanterol frente a tiotropio*

Tres ECA (1.025 eventos; RR: 1,08; IC del 95%, 0,99-1,19; 36 pacientes más por 1.000, de 5 menos a 86 más).

Confianza en los resultados: moderada (imprecisión).

#### *Aclidinio + formoterol frente a aclidinio*

Un ECA (672 eventos; RR: 1,07; IC del 95%, 0,93-1,22; 38 pacientes más por 1.000, de 38 menos a 120 más).

Confianza en los resultados: moderada (imprecisión).

#### *Aclidinio + formoterol frente a formoterol*

Un ECA (667 eventos; RR: 1,11; IC del 95%, 0,97-1,27; 58 pacientes más por 1.000, de 16 menos a 142 más).

Confianza en los resultados: moderada (imprecisión).

### **Síntomas: número de pacientes con una mejoría de más de 1 punto del índice de disnea transicional (TDI)**

Todas las comparaciones muestran un aumento del número de pacientes con una mejoría relevante de los síntomas favorable a la combinación de 2 broncodilatadores en comparación con 1 solo. De todos modos, esta diferencia alcanzó la significación solo en algunas comparaciones.

#### *Glicopirronio + indacaterol frente a glicopirronio*

Un ECA (624 eventos; RR: 1,07; IC del 95%, 0,98-1,18; 44 pacientes más por 1.000, de 13 menos a 114 más).

Confianza en los resultados: moderada (imprecisión).

#### *Glicopirronio + indacaterol frente a indacaterol*

Dos ECA (919 eventos; RR: 1,13; IC del 95%, 0,97-1,32; 83 pacientes más por 1.000, de 19 menos a 204 más).

Confianza en los resultados: moderada (imprecisión).

#### *Glicopirronio + indacaterol frente a tiotropio*

Un ECA (607 eventos; RR: 1,16; IC del 95%, 1,05-1,27; 94 pacientes más por 1.000, de 29 más a 159 más; NNT = 11).

Confianza en los resultados: moderada (limitaciones en el diseño).

#### *Umeclidinio + vilanterol frente a umeclidinio*

Tres ECA (1.091 eventos; RR: 1,14; IC del 95%, 1,04-1,24; 62 pacientes más por 1.000, de 18 más a 106 más; NNT = 16).

Confianza en los resultados: alta.

#### *Umeclidinio + vilanterol frente a vilanterol*

Tres ECA (1.068 eventos; RR: 1,23; IC del 95%, 1,12-1,34; 95 pacientes más por 1.000, de 50 más a 141 más; NNT = 10).

Confianza en los resultados: alta.

#### *Umeclidinio + vilanterol frente a tiotropio*

Dos ECA (660 eventos; RR: 1,06; IC del 95%, 0,94-1,18; 30 pacientes más por 1.000, de 30 menos a 89 más).

Confianza en los resultados: moderada (imprecisión).

#### *Aclidinio + formoterol (400/12 µg) frente a aclidinio*

Dos ECA (847 eventos; RR: 1,11; IC del 95%, 1,01-1,21; 61 pacientes más por 1.000, de 6 más a 117 más; NNT = 18 [10-129]).

Confianza en los resultados: moderada (imprecisión).

#### *Aclidinio + formoterol (400/12 µg) frente a formoterol*

Dos ECA (851 eventos; RR: 1,08; IC del 95%, 0,99-1,18; 45 pacientes más por 1.000, de 6 menos a 102 más).

Confianza en los resultados: moderada (imprecisión).

## **EFFECTOS ADVERSOS**

### **Pacientes con eventos adversos graves**

No se han encontrado diferencias entre la combinación de 2 broncodilatadores y 1 solo por lo que se refiere a acontecimientos adversos graves (no fatales).

#### *Tiotropio + LABA frente a tiotropio*

Nueve ECA (910 eventos; RR: 1,06; IC del 95%, 0,94-1,19; 5 pacientes más por 1.000, de 5 menos a 17 más).

Confianza en los resultados: alta.

#### *Tiotropio + LABA frente a LABA*

Cuatro ECA (536 eventos; RR: 0,95; IC del 95%, 0,81-1,11; 7 pacientes menos por 1.000, de 28 menos a 16 más).

Confianza en los resultados: moderada (imprecisión).

#### *Glicopirronio + indacaterol frente a glicopirronio*

Tres ECA (233 eventos; RR: 0,91; IC del 95%, 0,76-1,07; 12 pacientes menos por 1.000, de 32 menos a 9 más).

Confianza en los resultados: moderada (imprecisión).

#### *Glicopirronio + indacaterol frente a indacaterol*

Tres ECA (92 eventos; RR: 0,88; IC del 95%, 0,59-1,31; 5 pacientes menos por 1.000, de 17 menos a 13 más).

Confianza en los resultados: moderada (imprecisión).

#### *Glicopirronio + indacaterol frente a tiotropio*

Dos ECA (373 eventos; RR: 1,03; IC del 95%, 0,86-1,23; 5 pacientes menos por 1.000, de 21 menos a 35 más).

Confianza en los resultados: baja (imprecisión, limitaciones en el diseño).

#### *Umeclidinio + vilanterol frente a umeclidinio*

Cinco ECA (163 eventos; RR: 1,03; IC del 95%, 0,75-1,42; 2 pacientes menos por 1.000, de 14 menos a 24 más).

Confianza en los resultados: moderada (imprecisión).

#### *Umeclidinio + vilanterol frente a vilanterol*

Cinco ECA (140 eventos; RR: 0,67; IC del 95%, 0,40-1,14; 19 pacientes menos por 1.000, de 35 menos a 8 más).

Confianza en los resultados: baja (imprecisión e inconsistencia).

#### *Umeclidinio + vilanterol frente a tiotropio*

Cuatro ECA (139 eventos; RR: 0,88; IC del 95%, 0,45-1,71; 6 pacientes menos por 1.000, de 29 menos a 38 más).

Confianza en los resultados: baja (imprecisión e inconsistencia).

#### *Aclidinio + formoterol frente a aclidinio*

Dos ECA (75 eventos; RR: 1,27; IC del 95%, 0,82-1,99; 12 pacientes más por 1.000, de 8 menos a 45 más).

Confianza en los resultados: moderada (imprecisión).

#### *Aclidinio + formoterol frente a formoterol*

Dos ECA (71 eventos; RR: 1,44; IC del 95%, 0,90-2,28; 18 pacientes más por 1.000, de 4 menos a 52 más).

Confianza en los resultados: moderada (imprecisión).

### **Ingresos hospitalarios**

Solo ha sido posible analizar los ingresos hospitalarios (por cualquier causa) para las combinaciones de tiotropio + LABA, sin que se muestren diferencias significativas respecto a un solo broncodilatador.

#### *Tiotropio + LABA frente a tiotropio*

Cuatro ECA (689 eventos; RR: 1,01; IC del 95%, 0,88-1,16; 1 paciente más por 1.000, de 17 menos a 23 más).

Confianza en los resultados: moderada (evidencia indirecta).

#### *Tiotropio + LABA frente a LABA*

Tres ECA (480 eventos; RR: 0,94; IC del 95%, 0,79-1,12; 8 pacientes menos por 1.000, de 29 menos a 16 más).

Confianza en los resultados: moderada (evidencia indirecta).

Tampoco se mostraron diferencias al evaluar las hospitalizaciones debidas a exacerbaciones.

### **Retiradas del tratamiento**

Solo ha sido posible analizar las retiradas del tratamiento para las combinaciones de tiotropio + LABA, que mostraron una tendencia a la reducción que solo fue significativa cuando se compararon con un LABA.

#### *Tiotropio + LABA frente a tiotropio*

Nueve ECA (1.111 eventos; RR: 0,93; IC del 95%, 0,78-1,11; 9 pacientes menos por 1.000, de 27 menos a 14 más).

Confianza en los resultados: baja (evidencia indirecta, imprecisión).

#### *Tiotropio + LABA frente a LABA*

Tres ECA (501 eventos; RR: 0,70; IC del 95%, 0,58-0,85; 53 pacientes menos por 1.000, de 74 menos a 26 menos; NNT = 19).

Confianza en los resultados: moderada (evidencia indirecta).

### **Balance riesgo/beneficio**

De forma general, un tratamiento con 2 broncodilatadores aporta más efectos beneficiosos que el tratamiento con 1 solo, sin aumentar los efectos indeseados graves.

Cualquier opción de doble broncodilatación mejora la función respiratoria (FEV<sub>1</sub>) respecto a la monoterapia. Sin embargo, los valores centrales apuntan a una mejoría modesta y varían de 50 a 110 ml. La calidad de vida (valores totales de la escala SGRQ) solo mostró una mejoría significativa con la combinación de tiotropio + LABA frente a

monoterapia (tiotropio o LABA). En ninguno de los casos, los valores centrales o los extremos del IC representan una mejoría clínicamente relevante. Diferentes opciones de doble broncodilatación mejoraron significativamente el número de pacientes con una mejoría relevante en la calidad de vida (reducción > 4 puntos en los valores totales de la escala SGRQ): combinación de tiotropio + LABA frente a monoterapia (tiotropio o LABA), glicopirronio + indacaterol frente a tiotropio y umeclidinio + vilanterol frente a umeclidinio. La doble broncodilatación (glicopirronio + indacaterol o umeclidinio + vilanterol) mejoró la

disnea en comparación con la monoterapia (glicopirronio, umeclidinio o vilanterol). También se observó una mejoría de la disnea con la doble terapia con aclidinio + formoterol en comparación con el aclidinio en monoterapia.

Solo 2 ECA evaluaron la efectividad de la doble broncodilatación en pacientes con antecedentes de exacerbaciones previas. Únicamente la combinación de glicopirronio + indacaterol mostró una reducción significativa de la frecuencia de exacerbaciones (de cualquier gravedad) en comparación con tiotropio o glicopirronio. El efecto sobre la frecuencia de exacerbaciones graves fue variable y no significativo. Los

estudios tampoco mostraron un efecto sobre el tiempo hasta la primera exacerbación.

Aunque no se observa un incremento significativo de los efectos adversos graves, es de esperar que el uso de 2 broncodilatadores se asocie a más efectos adversos, la mayoría leves. Como toda combinación a dosis fijas, ante cualquier evento o intolerancia, resulta más complejo individualizar las dosis de uno de los principios activos.

Aceptabilidad: La doble terapia broncodilatadora es de elección frente a la terapia con un solo broncodilatador en pacientes de alto riesgo.

|                 |               |
|-----------------|---------------|
| Recomendaciones | Débil a favor |
|-----------------|---------------|

La terapia con doble broncodilatación proporciona una mayor eficacia broncodilatadora y es de elección en pacientes sintomáticos a pesar de seguir un tratamiento con un solo broncodilatador.

**Especificaciones:** En pacientes con afectación espirométrica grave o muy grave, la terapia con doble broncodilatación es recomendable de inicio sobre la monoterapia, por su mayor efecto sobre la función pulmonar.

Tabla 12.1. Resumen de los estudios de comparación entre doble broncodilatación y monoterapias

|                                         | Outcomes                                                                        | N° of participants (studies) | Quality of the evidence (GRADE) | Relative effect (95% CI)       | Risk difference                                                  |
|-----------------------------------------|---------------------------------------------------------------------------------|------------------------------|---------------------------------|--------------------------------|------------------------------------------------------------------|
| Mortality (all cause)                   | LABA + Tiotropium vs. Tiotropium                                                | 9633 (8 RCTs)                | ⊕⊕⊕○<br>MODERATE                | RR 1.22 (0.80 to 1.86)         | 2 more per 1000 (2 fewer to 7 more)                              |
|                                         | LABA + Tiotropium vs. LABA                                                      | 3514 (3 RCTs)                | ⊕⊕⊕○<br>MODERATE                | RR 1.15 (0.62 to 2.15)         | 2 more per 1000 (4 fewer to 13 more)                             |
|                                         | Indacaterol + Glycopyrronium vs. Glycopyrronium                                 | 3455 (3 RCTs)                | ⊕⊕⊕○<br>MODERATE                | RR 0.97 (0.56 to 1.69)         | 0 fewer per 1000 (7 fewer to 10 more)                            |
|                                         | Indacaterol + Glycopyrronium vs. Tiotropium                                     | 2441 (2 RCTs)                | ⊕⊕○○<br>LOW                     | RR 0.87 (0.51 to 1.49)         | 3 fewer per 1000 (11 fewer to 11 more)                           |
|                                         | Indacaterol + Glycopyrronium vs. Indacaterol                                    | 1973 (2 RCTs)                | ⊕⊕⊕○<br>MODERATE                | RR 0.31 (0.05 to 1.97)         | 3 fewer per 1000 (5 fewer to 5 more)                             |
|                                         | Umeclidinium + Vilanterol vs. Single BD                                         | 8638 (7 RCTs)                | ⊕⊕⊕○<br>MODERATE                | RR 0.59 (0.32 to 1.09)         | 2 fewer per 1000 (4 fewer to 1 more)                             |
|                                         | Indacaterol + Glycopyrronium vs. Vilanterol                                     | 2970 (5 RCTs)                | ⊕⊕⊕○<br>MODERATE                | RR 0.63 (0.20 to 1.94)         | 2 fewer per 1000 (4 fewer to 5 more)                             |
|                                         | Umeclidinium + Vilanterol vs. Umeclidinium                                      | 3482 (6 RCTs)                | ⊕⊕⊕○<br>MODERATE                | RR 0.49 (0.20 to 1.22)         | 4 fewer per 1000 (6 fewer to 2 more)                             |
|                                         | Umeclidinium + Vilanterol vs. Tiotropium                                        | 2186 (2 RCTs)                | ⊕⊕⊕○<br>MODERATE                | RR 0.81 (0.23 to 2.79)         | 1 fewer per 1000 (4 fewer to 8 more)                             |
|                                         | Aclidinium + Formoterol vs. Aclidinium                                          | 1442 (2 RCTs)                | ⊕⊕⊕○<br>MODERATE                | RR 0.74 (0.09 a 5.83)          | 1 fewer per 1000 (4 fewer to 20 more)                            |
|                                         | Aclidinium + Formoterol vs. Formoterol                                          | 1436 (2 RCTs)                | ⊕⊕⊕○<br>MODERATE                | RR 0.99 (0.14 a 7.04)          | 0 fewer per 1000 (2 fewer to 17 more)                            |
| Patients. with one or more exacerbation | LABA + Tiotropium vs. Tiotropium (any exacerbation)                             | 304 (1 RCTs)                 | ⊕⊕⊕○<br>MODERATE                | RR 0.98 (0.85 to 1.13)         | 14 fewer per 1000 (93 more to 108 fewer)<br>Sensitivity analysis |
|                                         | LABA + Tiotropium vs. Tiotropium (severe exacerbations)                         | 304 (1 RCTs)                 | ⊕⊕⊕○<br>MODERATE                | RR 0.82 (0.57 to 1.17)         | 57 fewer per 1000 (53 more to 135 fewer)                         |
|                                         | Indacaterol + Glycopyrronium vs. Tiotropium (moderate/severe exacerbations)     | 1466 (1 RCTs)                | ⊕⊕⊕○<br>MODERATE                | RR 1.05 (0.96 to 1.15)         | 27 more per 1000 (22 fewer to 82 more)                           |
|                                         | Indacaterol + Glycopyrronium vs. Glycopyrronium (moderate/severe exacerbations) | 1468 (1 RCTs)                | ⊕⊕⊕○<br>MODERATE                | RR 1.00 (0.91 to 1.09)         | 0 fewer per 1000 (52 fewer to 52 more)                           |
| Rate ratio of exacerbations             | LABA + Tiotropium vs. Tiotropium (any exacerbation)                             | 304 (1 RCTs)                 | ⊕⊕⊕○<br>MODERATE                | Rate ratio 1.06 (0.87 to 1.29) |                                                                  |
|                                         | LABA + Tiotropium vs. Tiotropium (severe exacerbations)                         | 304 (1 RCTs)                 | ⊕⊕⊕○<br>MODERATE                | Rate ratio 0.83 (0.54 to 1.28) |                                                                  |
|                                         | Indacaterol + Glycopyrronium vs. Tiotropium (any exacerbation)                  | 1466 (1 RCT)                 | ⊕⊕⊕○<br>MODERATE                | Rate ratio 0.86 (0.75 to 0.95) |                                                                  |

Tabla 12.1. Resumen de los estudios de comparación entre doble broncodilatación y monoterapias (cont.)

|                                                                     | Outcomes                                                              | N° of participants (studies) | Quality of the evidence (GRADE) | Relative effect (95% CI)                 | Risk difference                                        |
|---------------------------------------------------------------------|-----------------------------------------------------------------------|------------------------------|---------------------------------|------------------------------------------|--------------------------------------------------------|
| Rate ratio of exacerbations                                         | Indacaterol + Glycopyrronium vs. Tiotropium (severe exacerbations)    | 1466 (1 RCT)                 | ⊕⊕⊕○<br>MODERATE                | <b>Rate ratio 1.16</b><br>(0.84 to 1.60) |                                                        |
|                                                                     | Indacaterol + Glycopyrronium vs. Glycopyrronium (any exacerbation)    | 1468 (1 RCT)                 | ⊕⊕⊕○<br>MODERATE                | <b>Rate ratio 0.85</b><br>(0.77 to 0.94) |                                                        |
|                                                                     | Indacaterol + Glycopyrronium vs. Glycopyrronium (severe exacerbation) | 1468 (1 RCT)                 | ⊕⊕⊕○<br>MODERATE                | <b>Rate ratio 0.81</b><br>(0.60 to 1.09) |                                                        |
| Time to first exacerbation                                          | LABA + Tiotropium vs. Tiotropium                                      | 304 (1 RCT)                  | ⊕⊕⊕○<br>MODERATE                | <b>HR 1.02</b><br>(0.77 to 1.35)         | Unadjusted analysis                                    |
|                                                                     | Indacaterol + Glycopyrronium vs. Tiotropium                           | 1466 (1 RCT)                 | ⊕⊕⊕○<br>MODERATE                | <b>HR 1.13</b><br>(0.83 to 1.54)         |                                                        |
|                                                                     | Indacaterol + Glycopyrronium vs. Glycopyrronium                       | 1468 (1 RCT)                 | ⊕⊕⊕○<br>MODERATE                | <b>HR 0.79</b><br>(0.60 to 1.04)         |                                                        |
| Trough forced expiratory volume in 1 second (FEV <sub>1</sub> ) (L) | LABA + Tiotropium vs. Tiotropium                                      | 9573 (10 RCTs)               | ⊕⊕⊕⊕<br>HIGH                    | -                                        | MD <b>0.06 liters more</b><br>(0.05 more to 0.07 more) |
|                                                                     | LABA + Tiotropium vs. LABA                                            | 3513 (4 RCTs)                | ⊕⊕⊕⊕<br>HIGH                    | -                                        | MD <b>0.07 liters more</b><br>(0.06 more to 0.09 more) |
|                                                                     | Indacaterol + Glycopyrronium vs. Glycopyrronium                       | 947 (1 RCT)                  | ⊕⊕⊕⊕<br>HIGH                    | -                                        | MD <b>0.11 liters more</b><br>(0.06 more to 0.16 more) |
|                                                                     | Indacaterol + Glycopyrronium vs. Tiotropium                           | 954 (1 RCT)                  | ⊕⊕⊕○<br>MODERATE                | -                                        | MD <b>0.1 liters more</b><br>(0.05 more to 0.15 more)  |
|                                                                     | Indacaterol + Glycopyrronium vs. Indacaterol                          | 1382 (2 RCTs)                | ⊕⊕⊕⊕<br>HIGH                    | -                                        | MD <b>0.07 liters more</b><br>(0.04 more to 0.1 more)  |
|                                                                     | Umeclidinium + Vilanterol vs. Tiotropium                              | (4 RCTs)                     | ⊕⊕⊕⊕<br>HIGH                    | -                                        | MD <b>0.09 liters more</b><br>(0.07 more to 0.11 more) |
|                                                                     | Umeclidinium + Vilanterol vs. Umeclidinium                            | (4 RCTs)                     | ⊕⊕⊕⊕<br>HIGH                    | -                                        | MD <b>0.05 liters more</b><br>(0.03 more to 0.08 more) |
|                                                                     | Umeclidinium + Vilanterol vs. Vilanterol                              | (5 RCTs)                     | ⊕⊕⊕⊕<br>HIGH                    | -                                        | MD <b>0.1 liters more</b><br>(0.09 more to 0.12 more)  |
|                                                                     | Acclidinium + Formoterol vs. Formoterol                               | (2 RCTs)                     | ⊕⊕⊕⊕<br>HIGH                    | -                                        | MD <b>0.06 liters more</b><br>(0.02 more to 0.10 more) |
|                                                                     | Acclidinium + Formoterol vs. Acclidinium                              | (2 RCTs)                     | ⊕⊕⊕○<br>MODERATE                |                                          | Significant differences up to week 4 or 12             |
| SGRQ total scores                                                   | LABA + Tiotropium vs. Tiotropium                                      | 6709 (5 RCTs)                | ⊕⊕⊕⊕<br>HIGH                    | -                                        | MD <b>1.34 points less</b><br>(1.87 less to 0.8 less)  |
|                                                                     | LABA + Tiotropium vs. LABA                                            | 3378 (4 RCTs)                | ⊕⊕⊕○<br>MODERATE                | -                                        | MD <b>1.25 points less</b><br>(2.14 less to 0.37 less) |
|                                                                     | Umeclidinium + Vilanterol vs. Umeclidinium                            | (2 RCTs)                     | ⊕⊕⊕○<br>MODERATE                | -                                        | MD <b>2.1 points less</b><br>(4.52 less to 0.31 more)  |
|                                                                     | Umeclidinium + Vilanterol vs. Vilanterol                              | (2 RCTs)                     | ⊕⊕⊕○<br>MODERATE                | -                                        | MD <b>1.64 points less</b><br>(3.98 less to 0.7 more)  |
|                                                                     | Acclidinium + Formoterol vs. Acclidinium                              | (1 RCT)                      | ⊕⊕⊕○<br>MODERATE                |                                          | MD <b>1.36 points less</b><br>(3.3 less to 0.58 more)  |
|                                                                     | Acclidinium + Formoterol vs. Formoterol                               | (1 RCT)                      | ⊕⊕⊕○<br>MODERATE                |                                          | MD <b>1.59 points less</b><br>(3.52 less to 0.34 more) |
| Patients with ≥ 4 points in SGRQ improvement                        | LABA + Tiotropium vs. Tiotropium                                      | 5978 (3 RCTs)                | ⊕⊕⊕⊕<br>HIGH                    | <b>RR 1.14</b><br>(1.09 to 1.20)         | <b>67 more per 1000</b><br>(43 more to 96 more)        |
|                                                                     | LABA + Tiotropium vs. LABA                                            | 2923 (2 RCTs)                | ⊕⊕⊕⊕<br>HIGH                    | <b>RR 1.24</b><br>(1.14 to 1.34)         | <b>107 more per 1000</b><br>(63 more to 152 more)      |
|                                                                     | Umeclidinium + Vilanterol vs. Tiotropium                              | 2170 (3 RCTs)                | ⊕⊕⊕○<br>MODERATE                | <b>RR 1.08</b><br>(0.99 to 1.19)         | <b>36 more per 1000</b><br>(5 fewer to 86 more)        |
|                                                                     | Umeclidinium + Vilanterol vs. Umeclidinium                            | 2295 (3 RCTs)                | ⊕⊕⊕○<br>MODERATE                | <b>RR 1.13</b><br>(1.03 to 1.25)         | <b>51 more per 1000</b><br>(12 more to 99 more)        |
|                                                                     | Umeclidinium + Vilanterol vs. Vilanterol                              | 2261 (3 RCTs)                | ⊕⊕⊕○<br>MODERATE                | <b>RR 1.08</b><br>(0.98 to 1.19)         | <b>33 more per 1000</b><br>(8 fewer to 78 more)        |
|                                                                     | Indacaterol + Glycopyrronium vs. Glycopyrronium                       | 950 (1 RCT)                  | ⊕⊕⊕○<br>MODERATE                | <b>RR 1.06</b><br>(0.96 to 1.17)         | <b>36 more per 1000</b><br>(24 fewer to 103 more)      |
|                                                                     | Indacaterol + Glycopyrronium vs. Tiotropium                           | 958 (1 RCT)                  | ⊕⊕○○<br>LOW                     | <b>RR 1.13</b><br>(1.02 to 1.26)         | <b>73 more per 1000</b><br>(11 more to 146 more)       |
|                                                                     | Indacaterol + Glycopyrronium vs. Indacaterol                          | 1399 (2 RCTs)                | ⊕⊕⊕○<br>MODERATE                | <b>RR 1.09</b><br>(0.92 to 1.30)         | <b>52 more per 1000</b><br>(46 fewer to 173 more)      |

Tabla 12.1. Resumen de los estudios de comparación entre doble broncodilatación y monoterapias (cont.)

|                                           | Outcomes                                        | N° of participants (studies) | Quality of the evidence (GRADE) | Relative effect (95% CI)         | Risk difference                                    |
|-------------------------------------------|-------------------------------------------------|------------------------------|---------------------------------|----------------------------------|----------------------------------------------------|
|                                           | Acidinium + Formoterol vs. Acidinium            | 672 (1 RCT)                  | ⊕⊕⊕○<br>MODERATE                | <b>RR 1.07</b><br>(0.93 to 1.22) | <b>38 more per 1000</b><br>(38 fewer to 120 more)  |
|                                           | Acidinium + Formoterol vs. Formoterol           | 667 (1 RCT)                  | ⊕⊕⊕○<br>MODERATE                | <b>RR 1.11</b><br>(0.97 to 1.27) | <b>58 more per 1000</b><br>(16 fewer to 142 more)  |
| <b>TDI score improvement of ≥ 1 point</b> | Indacaterol + Glycopyrronium vs. Glycopyrronium | 950 (1 RCT)                  | ⊕⊕⊕○<br>MODERATE                | <b>RR 1.07</b><br>(0.98 to 1.18) | <b>44 more per 1000</b><br>(13 fewer to 114 more)  |
|                                           | Indacaterol + Glycopyrronium vs. Tiotropium     | 958 (1 RCT)                  | ⊕⊕⊕○<br>MODERATE                | <b>RR 1.16</b><br>(1.05 to 1.27) | <b>94 more per 1000</b><br>(29 more to 159 more)   |
|                                           | Indacaterol + Glycopyrronium vs. Indacaterol    | 1368 (2 RCTs)                | ⊕⊕⊕○<br>MODERATE                | <b>RR 1.13</b><br>(0.97 to 1.32) | <b>83 more per 1000</b><br>(19 fewer to 204 more)  |
|                                           | Umeclidinium + Vilanterol vs. Tiotropium        | 1281 (2 RCTs)                | ⊕⊕⊕○<br>MODERATE                | <b>RR 1.06</b><br>(0.94 to 1.18) | <b>30 more per 1000</b><br>(30 fewer to 89 more)   |
|                                           | Umeclidinium + Vilanterol vs. Umeclidinium      | 2295 (3 RCTs)                | ⊕⊕⊕⊕<br>HIGH                    | <b>RR 1.14</b><br>(1.04 to 1.24) | <b>62 more per 1000</b><br>(18 more to 106 more)   |
|                                           | Umeclidinium + Vilanterol vs. Vilanterol        | 2276 (3 RCTs)                | ⊕⊕⊕⊕<br>HIGH                    | <b>RR 1.23</b><br>(1.12 to 1.34) | <b>95 more per 1000</b><br>(50 more to 141 more)   |
|                                           | Acidinium + Formoterol vs. Acidinium            | 1442 (2 RCTs)                | ⊕⊕⊕○<br>MODERATE                | <b>RR 1.11</b><br>(1.01 to 1.21) | <b>61 more per 1000</b><br>(6 more to 117 more)    |
|                                           | Acidinium + Formoterol vs. Formoterol           | 1436 (2 RCTs)                | ⊕⊕⊕○<br>MODERATE                | <b>RR 1.08</b><br>(0.99 to 1.18) | <b>45 more per 1000</b><br>(6 fewer to 102 more)   |
| <b>Serious adverse event (non-fatal)</b>  | LABA + Tiotropium vs. Tiotropium                | 9654 (9 RCTs)                | ⊕⊕⊕⊕<br>HIGH                    | <b>RR 1.06</b><br>(0.94 to 1.19) | <b>5 more per 1000</b><br>(5 fewer to 17 more)     |
|                                           | LABA + Tiotropium vs. LABA                      | 3552 (4 RCTs)                | ⊕⊕⊕○<br>MODERATE                | <b>RR 0.95</b><br>(0.81 to 1.11) | <b>7 fewer per 1000</b><br>(28 fewer to 16 more)   |
|                                           | Indacaterol + Glycopyrronium vs. Glycopyrronium | 3455 (3 RCTs)                | ⊕⊕⊕○<br>MODERATE                | <b>RR 0.91</b><br>(0.76 to 1.07) | <b>12 fewer per 1000</b><br>(32 fewer to 9 more)   |
|                                           | Indacaterol + Glycopyrronium vs. Tiotropium     | 2441 (2 RCTs)                | ⊕⊕○○<br>LOW                     | <b>RR 1.03</b><br>(0.86 to 1.23) | <b>5 more per 1000</b><br>(21 fewer to 35 more)    |
|                                           | Indacaterol + Glycopyrronium vs. Indacaterol    | 2420 (3 RCTs)                | ⊕⊕⊕○<br>MODERATE                | <b>RR 0.88</b><br>(0.59 to 1.31) | <b>5 fewer per 1000</b><br>(17 fewer to 13 more)   |
|                                           | Umeclidinium + Vilanterol vs. Tiotropium        | 2658 (4 RCTs)                | ⊕⊕○○<br>LOW                     | <b>RR 0.88</b><br>(0.45 to 1.71) | <b>6 fewer per 1000</b><br>(29 fewer to 38 more)   |
|                                           | Umeclidinium + Vilanterol vs. Umeclidinium      | 2970 (5 RCTs)                | ⊕⊕⊕○<br>MODERATE                | <b>RR 1.03</b><br>(0.75 to 1.42) | <b>2 more per 1000</b><br>(14 fewer to 24 more)    |
|                                           | Umeclidinium + Vilanterol vs. Vilanterol        | 2970 (5 RCTs)                | ⊕⊕○○<br>LOW                     | <b>RR 0.67</b><br>(0.40 to 1.14) | <b>19 fewer per 1000</b><br>(35 fewer to 8 more)   |
|                                           | Acidinium + Formoterol vs. Acidinium            | 1442 (2 RCTs)                | ⊕⊕⊕○<br>MODERATE                | <b>RR 1.27</b><br>(0.82 to 1.99) | <b>12 more per 1000</b><br>(8 fewer to 45 more)    |
|                                           | Acidinium + Formoterol vs. Formoterol           | 1436 (2 RCTs)                | ⊕⊕⊕○<br>MODERATE                | <b>RR 1.44</b><br>(0.90 to 2.28) | <b>18 more per 1000</b><br>(4 fewer to 52 more)    |
| <b>Hospital admission (all cause)</b>     | LABA + Tiotropium vs. Tiotropium                | 4856 (4 RCTs)                | ⊕⊕⊕○<br>MODERATE                | <b>RR 1.01</b><br>(0.88 to 1.16) | <b>1 more per 1000</b><br>(17 fewer to 23 more)    |
|                                           | LABA + Tiotropium vs. LABA                      | 3514 (3 RCTs)                | ⊕⊕⊕○<br>MODERATE                | <b>RR 0.94</b><br>(0.79 to 1.12) | <b>8 fewer per 1000</b><br>(29 fewer to 16 more)   |
| <b>Hospital admission (exacerbation)</b>  | LABA + Tiotropium vs. Tiotropium                | 4856 (4 RCTs)                | ⊕⊕⊕⊕<br>HIGH                    | <b>RR 1.02</b><br>(0.81 to 1.28) | <b>1 more per 1000</b><br>(12 fewer to 17 more)    |
|                                           | LABA + Tiotropium vs. LABA                      | 3514 (3 RCTs)                | ⊕⊕⊕○<br>MODERATE                | <b>RR 0.90</b><br>(0.65 to 1.25) | <b>6 fewer per 1000</b><br>(19 fewer to 14 more)   |
| <b>Withdrawal</b>                         | LABA + Tiotropium vs. Tiotropium                | 9654 (9 RCTs)                | ⊕⊕○○<br>LOW                     | <b>RR 0.93</b><br>(0.78 to 1.11) | <b>9 fewer per 1000</b><br>(27 fewer to 14 more)   |
|                                           | LABA + Tiotropium vs. LABA                      | 3514 (3 RCTs)                | ⊕⊕⊕○<br>MODERATE                | <b>RR 0.70</b><br>(0.58 to 0.85) | <b>53 fewer per 1000</b><br>(74 fewer to 26 fewer) |



Tabla 12.2. Comparaciones existentes entre doble broncodilatación y monoterapias

|                       | LABA + Tiotropium                                                                                                                                                                                                   | Indacaterol + Glycopyrronium                                                                                                                                                                                                                                               | Umeclidinium + Vilanterol                                                                                                                                                                                                       | Acclidinium + Formoterol                                                                                                                     |
|-----------------------|---------------------------------------------------------------------------------------------------------------------------------------------------------------------------------------------------------------------|----------------------------------------------------------------------------------------------------------------------------------------------------------------------------------------------------------------------------------------------------------------------------|---------------------------------------------------------------------------------------------------------------------------------------------------------------------------------------------------------------------------------|----------------------------------------------------------------------------------------------------------------------------------------------|
| <b>Tiotropium</b>     | <ul style="list-style-type: none"> <li>• FEV<sub>1</sub></li> <li>• SGRQ total scores</li> <li>• Patients with <math>\geq 4</math> points in SGRQ improvement (NNT = 14)</li> </ul>                                 | <ul style="list-style-type: none"> <li>• FEV<sub>1</sub></li> <li>• Incidence of exacerbations (any)</li> <li>• Patients with <math>\geq 4</math> points in SGRQ improvement (NNT = 9)</li> <li>• TDI score improvement of <math>\geq 1</math> point (NNT = 11)</li> </ul> | <ul style="list-style-type: none"> <li>• FEV<sub>1</sub></li> </ul>                                                                                                                                                             |                                                                                                                                              |
| <b>LABA</b>           | <ul style="list-style-type: none"> <li>• FEV<sub>1</sub></li> <li>• SGRQ total scores</li> <li>• Patients with <math>\geq 4</math> points in SGRQ improvement (NNT = 9)</li> <li>• Withdrawal (NNT = 19)</li> </ul> |                                                                                                                                                                                                                                                                            |                                                                                                                                                                                                                                 |                                                                                                                                              |
| <b>Glycopyrronium</b> |                                                                                                                                                                                                                     | <ul style="list-style-type: none"> <li>• FEV<sub>1</sub></li> <li>• Incidence of exacerbations (any)</li> </ul>                                                                                                                                                            |                                                                                                                                                                                                                                 |                                                                                                                                              |
| <b>Indacaterol</b>    |                                                                                                                                                                                                                     | <ul style="list-style-type: none"> <li>• FEV<sub>1</sub></li> </ul>                                                                                                                                                                                                        |                                                                                                                                                                                                                                 |                                                                                                                                              |
| <b>Umeclidinium</b>   |                                                                                                                                                                                                                     |                                                                                                                                                                                                                                                                            | <ul style="list-style-type: none"> <li>• FEV<sub>1</sub></li> <li>• Patients with <math>\geq 4</math> points in SGRQ improvement (NNT = 18)</li> <li>• TDI score improvement of <math>\geq 1</math> point (NNT = 16)</li> </ul> |                                                                                                                                              |
| <b>Vilanterol</b>     |                                                                                                                                                                                                                     |                                                                                                                                                                                                                                                                            | <ul style="list-style-type: none"> <li>• FEV<sub>1</sub></li> <li>• TDI score improvement of <math>\geq 1</math> point (NNT = 10)</li> </ul>                                                                                    |                                                                                                                                              |
| <b>Formoterol</b>     |                                                                                                                                                                                                                     |                                                                                                                                                                                                                                                                            |                                                                                                                                                                                                                                 | <ul style="list-style-type: none"> <li>• FEV<sub>1</sub></li> </ul>                                                                          |
| <b>Acclidinium</b>    |                                                                                                                                                                                                                     |                                                                                                                                                                                                                                                                            |                                                                                                                                                                                                                                 | <ul style="list-style-type: none"> <li>• FEV<sub>1</sub></li> <li>• TDI score improvement of <math>\geq 1</math> point (NNT = 18)</li> </ul> |

## Referencias

- \*Farne HA, Cates CJ. Long-acting beta2-agonist in addition to tiotropium versus either tiotropium or long-acting beta2-agonist alone for chronic obstructive pulmonary disease. *Cochrane Database Syst Rev*. 2015;(10):CD008989.
  - \*Rodrigo GJ, Neffen H. A Systematic Review of the Efficacy and Safety of a Fixed-Dose Combination of Umeclidinium and Vilanterol for the Treatment of COPD. *Chest*. 2015;148:397-407.
  - \*Ulrik CS. Clinical benefit of fixed-dose dual bronchodilation with glycopyrronium and indacaterol once daily in patients with chronic obstructive pulmonary disease: a systematic review. *Int J Chron Obstruct Pulmon Dis*. 2014;9:331-8.
  - \*\*Bateman ED, Ferguson GT, Barnes N, Gallagher N, Green Y, Henley M, et al. Dual bronchodilation with QVA149 versus single bronchodilator therapy: the SHINE study. *Eur Respir J*. 2013;42:1484-94.
  - \*\*Wedzicha JA, Decramer M, Ficker JH, Niewoehner DE, Sandström T, Taylor AF, et al. Analysis of chronic obstructive pulmonary disease exacerbations with the dual bronchodilator QVA149 compared with glycopyrronium and tiotropium (SPARK): a randomised, double-blind, parallel-group study. *Lancet Respir Med*. 2013;1:199-209.
  - \*\*Aaron SD, Vandemheen KL, Fergusson D, Maltais F, Bourbeau J, Goldstein R, et al. Tiotropium in combination with placebo, salmeterol, or fluticasone-salmeterol for treatment of chronic obstructive pulmonary disease: a randomized trial. *Ann Intern Med*. 2007;146:545-55.
  - \*\*Singh D, Jones PW, Bateman ED, Korn S, Serra C, Molins E, et al. Efficacy and safety of acclidinium bromide/formoterol fumarate fixed-dose combinations compared with individual components and placebo in patients with COPD (ACLIFORM-COPD): a multicentre, randomised study. *BMC Pulm Med*. 2014;14:178.
  - \*\*D'Urzo AD, Rennard SI, Kerwin EM, Mergel V, Leselbaum AR, Caracta CF. Efficacy and safety of fixed-dose combinations of acclidinium bromide/formoterol fumarate: the 24-week, randomized, placebo-controlled AUGMENT COPD study. *Respir Res*. 2014;15:123.
- Otros ensayos clínicos aleatorizados no referenciados en el texto**
- Buhl R, Maltais F, Abrahams R, Bjermer L, Derom E, Ferguson G, et al. Tiotropium and olodaterol fixed-dose combination versus mono-components in COPD (GOLD 2-4). *Eur Respir J*. 2015;45:969-79.
- Celli B, Crater G, Kilbride S, Mehta R, Tabberer M, Kalberg C, et al. Once daily umeclidinium/vilanterol 125/25 mcg therapy in COPD: a randomized, controlled study. *Chest*. 2014;145:981-91.
- Decramer M, Anzueto A, Kerwin E, Kaelin T, Richard N, Crater G, et al. Efficacy and safety of umeclidinium plus vilanterol versus tiotropium, vilanterol, or umeclidinium monotherapies over 24 weeks in patients with chronic obstructive pulmonary disease: results from two multicentre, blinded, randomised controlled trials. *Lancet Respir Med*. 2014;2:472-86.
- Donohue JF, Maleki-Yazdi MR, Kilbride S, Mehta R, Kalberg C, Church A. Efficacy and safety of once-daily umeclidinium/ vilanterol 62.5/25 mcg in COPD. *Respir Med*. 2013;107:1538-46.
- Donohue JF, Niewoehner D, Brooks J, O'Dell D, Church A. Safety and tolerability of once-daily umeclidinium/vilanterol 125/25 mcg and umeclidinium 125 mcg in patients with chronic obstructive pulmonary disease: results from a 52-week, randomized, double-blind, placebo-controlled study. *Respir Res*. 2014;15:78.
- GSK. An exercise endurance study to evaluate the effects of treatment of chronic obstructive pulmonary disease (COPD) patients with a dual bronchodilator: GSK573719/GW642444. Study A (COPD). GSK Clinical Study Register. Disponible en: <https://clinicaltrials.gov/ct2/show/NCT01328444>
- GSK. An exercise endurance study to evaluate the effects of treatment of chronic obstructive pulmonary disease (COPD) patients with a dual bronchodilator: GSK573719/GW642444. Study B (COPD). GSK Clinical Study Register. Disponible en: <https://clinicaltrials.gov/ct2/show/NCT01323660>
- Hoshino M, Ohtawa J. Computed tomography assessment of airway dimensions with combined tiotropium and indacaterol therapy in COPD patients. *Respirology*. 2014;19:403-10.
- Mahler DA, D'Urzo A, Bateman ED, Ozkan SA, White T, Peckitt C, et al. Concurrent use of indacaterol plus tiotropium in patients with COPD provides superior bronchodilation compared with tiotropium alone: a randomised, double-blind comparison. *Thorax*. 2012;67:781-8.
- Maleki-Yazdi MR, Kaelin T, Richard N, Zvarich M, Church A. Efficacy and safety of umeclidinium/vilanterol 62.5/25 mcg and tiotropium 18 mcg in chronic obstructive pulmonary disease: results of a 24-week, randomized, controlled trial. *Respir Med*. 2014;108:1752-60.
- Tashkin DP, Pearl J, Iezzoni D, Varghese ST. Formoterol and tiotropium compared with tiotropium alone for treatment of COPD. *COPD*. 2009;6:17-25.
- Vogelmeier C, Kardos P, Harari S, Gans SJ, Stenglein S, Thirlwell J. Formoterol mono- and combination therapy with tiotropium in patients with COPD: a 6-month study. *Respir Med*. 2008;102:1511-20.
- ZuWallack R, Allen L, Hernandez G, Ting N, Abrahams R. Efficacy and safety of combining olodaterol Respimat® and tiotropium HandiHaler® in patients with COPD: results of two randomized, double-blind, active-controlled studies. *Int J Chron Obstruct Pulmon Dis*. 2014;9:1133-44.

\*Revisión sistemática.

\*\*Ensayos clínicos aleatorizados.

# Tratamiento combinado (LABA/CI) frente a doble broncodilatación (LABA/LAMA)

## P13. Pregunta para responder:

*En los pacientes con EPOC estable, ¿se recomienda el uso de un tratamiento combinado con un broncodilatador más un corticoide inhalado frente al tratamiento con doble broncodilatación?*

Se localizaron 16 revisiones sistemáticas (RS), de las cuales se seleccionó 1 por ser la más actualizada: Horita et al (2015)<sup>1</sup>.

Esta RS identificó 7 estudios primarios (en 6 artículos). Se identificaron 3 ensayos clínicos aleatorizados (ECA) posteriores<sup>2-4</sup>.

Las intervenciones evaluadas para la doble broncodilatación fueron tiotropio + LABA, umeclidinio + vilanterol, glicopirronio + indacaterol y aclidinio + formoterol.

Estas intervenciones se compararon con un tratamiento combinado que incluyó salmeterol y fluticasona.

Se analizaron conjuntamente los resultados para cada uno de estos subgrupos y cuando fue posible se obtuvo un resultado conjunto para la doble broncodilatación frente a un tratamiento combinado. Para el análisis de la efectividad de las diferentes intervenciones sobre las exacerbaciones solo se han considerado los 2 estudios que incluyeron pacientes con exacerbaciones previas.

Los ECA incluidos para cada una de las comparaciones fueron:

### 1. Tiotropio + LABA<sup>2,5,6</sup>

Hoshino M et al (2015)<sup>5</sup>: estudio abierto de 16 semanas de seguimiento. Incluye pacientes exfumadores mayores de 40 años, con diagnóstico de EPOC, historia tabaquismo > 10 paquetes/año, flujo espiratorio máximo durante el primer segundo (FEV<sub>1</sub>) entre el 30 y el 80% de lo previsto y FEV<sub>1</sub>/capacidad vital forzada (FVC) < 0,70. Excluye pacientes con diagnóstico de asma, diagnóstico clínicamente significativo distinto a EPOC, uso de oxígeno suplementario al esfuerzo o exacerbación que haya necesitado tratamiento con antibióticos o glucocorticoides sistémicos.

Magnussen et al (2012)<sup>6</sup>: estudio cruzado doble ciego de 8 semanas de seguimiento. Incluye pacientes con EPOC estable, edad entre 40 y 75 años, antecedente de tabaquismo > 10 paquetes/año, FEV<sub>1</sub> ≤ 65% de lo previsto y volumen de gas torácico (TGV) ≥ 120% de lo previsto. Se excluyen pacientes con enfermedades significativas distintas a EPOC, antecedente de asma, rinitis alérgica o atopía, y aquellos con contraindicaciones para el test de ejercicio, limitaciones para el ejercicio no relacionadas con disnea o disnea de esfuerzo, o participación en un programa de rehabilitación pulmonar las 6 semanas previas al estudio.

Beeh et al (2016)<sup>2</sup>: estudio cruzado doble ciego con 4 tratamientos, de 6 semanas de seguimiento. Incluye pacientes con diagnóstico de EPOC de moderada a grave, FEV<sub>1</sub> posbroncodilatación ≥ 30% y ≤ 80% de lo previsto, FEV<sub>1</sub>/FVC < 70% al ingreso del estudio; edad > 40 años; fumador actual o pasado con antecedente de más de 10 paquetes/año, con capacidad de desarrollar pruebas de función pulmonar, y mantener diarios cuando se requiera y realizar adecuadamente la técnica con los dispositivos de inhalación. Se excluyen pacientes con otras enfermedades significativas o antecedente de exacerbación que haya requerido tratamiento con antibióticos, esteroides sistémicos u hospitalización en los 3 meses previos.

### 2. Umeclidinio + vilanterol<sup>7,8</sup>

Singh et al (2015)<sup>7</sup>: estudio de 12 semanas de seguimiento. Incluye pacientes ≥ 40 años de edad; con historia clínica EPOC establecida; FVC < 0,70 y un FEV<sub>1</sub> postsalbutamol ≥ 30% y ≤ 70%; disnea ≥ 2; historia de tabaquismo de 10 paquetes/año o más. Exclusión: antecedente de asma u otros trastornos respiratorios; hospitalización por neumonía dentro de las 12 semanas previas, ≥ 1 exacerbación por EPOC que haya requerido corticosteroides orales, antibióticos y/u hospitalización en los 12 meses anteriores a la selección.

Donohue et al (2015)<sup>8</sup>: 2 estudios de 12 semanas de seguimiento. Incluyen pacientes con EPOC moderada-grave (FEV<sub>1</sub> ≥ 30% y ≤ 70%), sin antecedentes de exacerbación definida, como síntomas de EPOC que requirieron tratamiento con corticoides orales, antibióticos u hospitalización el año anterior a la selección.

### 3. Glicopirronio + indacaterol<sup>4,9,10</sup>

Vogelmeier et al (2013)<sup>10</sup>: estudio aleatorizado, doble ciego, multicéntrico, de 26 semanas de seguimiento. Incluye pacientes con EPOC de moderada a grave (GOLD II o III), edad mayor de 40 años, fumadores actuales o exfumadores, con al menos antecedente de consumo de 10 paquetes/año. FEV<sub>1</sub> posbroncodilatación entre el 40 y el 80% de lo previsto y el ratio FVC < 0,70. Se excluyeron pacientes con antecedente de exacerbación por EPOC que hubiera precisado antibióticos, corticoides sistémicos u hospitalización en el año previo a la selección.

Zhong et al (2015)<sup>9</sup>: estudio aleatorizado, doble ciego, multicéntrico, de 26 semanas de seguimiento. Incluye pacientes mayores de 40 años, con EPOC de moderada a grave, GOLD II y III, con mMRC > 2. Se excluyeron pacientes con más de una exacerbación por EPOC documentada que hubieran requerido tratamiento con antibióticos y/o corticoides orales y/o hospitalización en el año previo o durante el periodo de inicio del estudio.

Wedzicha et al (2016)<sup>4</sup>: estudio aleatorizado doble ciego multicéntrico de 52 semanas de seguimiento. Incluye pacientes mayores de 40 años, con mMRC > 2, FEV<sub>1</sub> posbroncodilatación de menos del 25% a menos del 60% del valor previsto, FEV<sub>1</sub>/FVC ratio < 0,70. Se incluyen pacientes que hayan tenido por lo menos una exacerbación documentada que haya precisado antibióticos o glucocorticoides o ambos el año previo al estudio.

### 4. Aclidinio + formoterol<sup>3</sup>

Vogelmeier et al (2013)<sup>3</sup>: AFFIRM COPD (Aclidinium and Formoterol Findings in Respiratory Medicine COPD), estudio aleatorizado de 24 semanas de seguimiento, doble ciego, doble *dummy*, multicéntrico con control activo. Se incluyeron pacientes mayores de 40 años, con antecedentes de tabaquismo > 10 paquetes/año, diagnosticados con EPOC de moderada a grave (GOLD 2013 criterios: FEV<sub>1</sub> posbroncodilatador/FVC < 70% y FEV<sub>1</sub> < 80%), sintomáticos al principio del estudio. Estos fueron aleatorizados (1:1) a aclidinio/formoterol 400/12 µg 2 veces al día, utilizando genuair/pressair o salmeterol/fluticasona 50/500 µg 2 veces al día con Accuhaler. La aleatorización fue estratificada por el uso de corticoides inhalados y el número de exacerbaciones el año previo. Se excluyeron pacientes con infecciones respiratorias agudas o exacerbaciones dentro de las 6 semanas del periodo de cribado del estudio, que hubieran recibido triple terapia (LAMA/LABA/CI) en las últimas 4 semanas o rehabilitación pulmonar en los últimos 3 meses.



RESUMEN DE RESULTADOS

Prueba funcional respiratoria: FEV<sub>1</sub>

El tratamiento con doble broncodilatación aumenta de forma significativa el FEV<sub>1</sub> en comparación con el tratamiento combinado (diferencia media [MD]: 0,07 l; intervalo de confianza [IC] del 95%, 0,06-0,09 l más).

Aunque existe una variabilidad significativa entre los estudios, se han analizado conjuntamente los datos porque se evidencia consistencia en la dirección de los resultados.

Al valorar por tipo de doble broncodilatación, las diferencias medias son de 0,05 l para tiotropio + LABA, 0,09 l para umeclidinio + vilanterol, 0,07 l para glicopirronio + indacaterol y 0,09 l para aclidinio + formoterol.

La confianza en los resultados es alta, excepto para tiotropio + LABA, que es moderada, aunque no se descarta que este resultado sea clínicamente irrelevante.

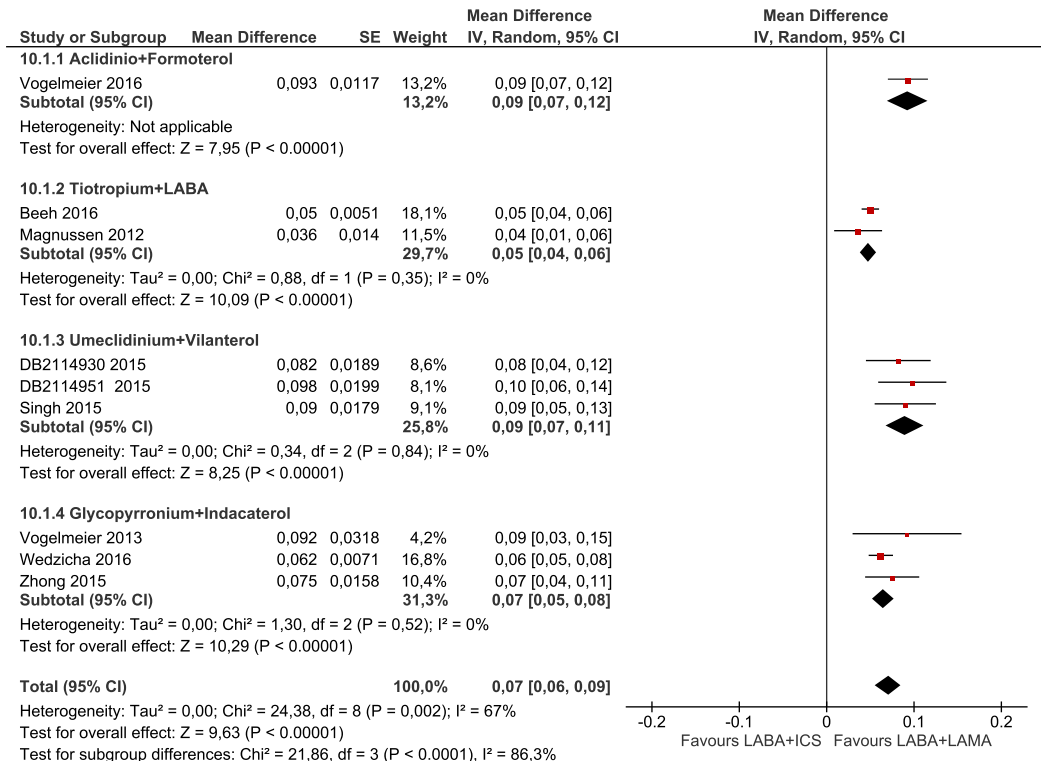

Figura 1. Resultados en relación con la prueba funcional respiratoria: FEV<sub>1</sub>.

Calidad de vida: SGRQ puntuación total

El tratamiento con doble broncodilatación no mejora de forma significativa la puntuación total de la escala SGRQ (Saint George's Respiratory Questionnaire) de calidad de vida en comparación con el tratamiento combinado, con excepción del subgrupo de tiotropio + LABA. En este subgrupo, este desenlace recoge los resultados de un estudio abierto<sup>3</sup>, con resultados a favor de la broncodilatación (MD: 5 puntos; IC del 95%, 7,16-2,84).

En la comparación aclidinio + formoterol frente a salmeterol + fluticasona, no hubo diferencias significativas en la puntuación total de

calidad de vida a las 24 semanas en la escala SGRQ (-4,7 y -5,7; p = 0,27).

No se considera adecuado un análisis conjunto del tratamiento combinado frente a la doble broncodilatación debido a la importante variabilidad entre los estudios.

La confianza en los resultados es moderada (por imprecisión), excepto para tiotropio + LABA, que es baja.

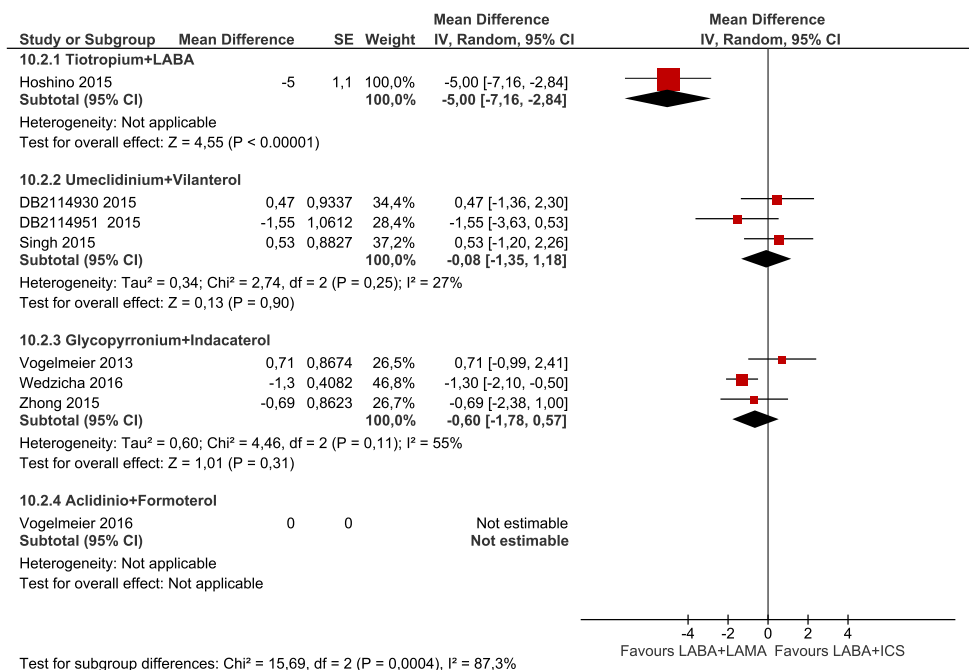

Figura 2. Resultados en relación con la calidad de vida: SGRQ puntuación total.

Calidad de vida: número de pacientes con mejoría de 4 puntos o más en la escala SGQR

Dos ECA que evaluaron glicopirronio + indacaterol frente a tratamiento combinado incluyeron este desenlace. El resultado conjunto de esta comparación (2 ECA, 1.729 pacientes) muestra que el tratamiento con glicopirronio + indacaterol aumenta de forma significativa la probabilidad de presentar una mejoría clínicamente relevante de la calidad de vida (personas con una mejoría de 4 puntos o más en la puntuación total de la escala SGRQ) en comparación con el tratamiento combinado (riesgo relativo [RR]: 1,16; IC del 95%, 1,05-1,21; 58 pacientes más por 1.000, de 22 más a 93 más; NNT = 18).

Un ECA que evalúa aclidinio + formoterol frente a tratamiento combinado incluye este desenlace, y no hay diferencias significativas entre los 2 brazos (RR: 0,94; IC del 95%, 0,84-1,06; 33 pacientes menos por 1.000, de 89 menos a 33 más).

La confianza en estos resultados es alta para glicopirronio + indacaterol y moderada para aclidinio + formoterol (por imprecisión). No se considera adecuado un análisis conjunto del tratamiento combinado frente a la doble broncodilatación debido a la importante variabilidad entre los estudios.

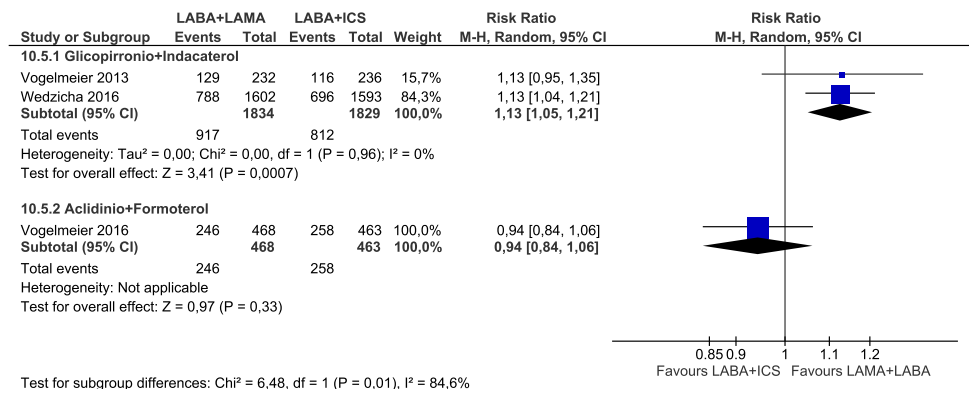

Figura 3. Resultados en relación con el número de pacientes con mejoría de 4 puntos o más en la escala SGQR.

Tiempo hasta la primera exacerbación moderada o grave

En el estudio que incluye específicamente pacientes con agudizaciones previas<sup>4</sup>, el tratamiento con glicopirronio + indacaterol redujo la probabilidad de presentar una exacerbación moderada o grave en el 22% respecto al tratamiento combinado (hazard ratio [HR]: 0,78; IC del 95%, 0,70-0,86).

El tiempo hasta la primera exacerbación moderada o grave con la doble broncodilatación fue de 127 días (IC del 95%, 107-149 días), mientras que con el tratamiento combinado fue de 87 días (IC del 95%, 81-103 días).

La confianza en este resultado es alta.

Tasa anual de exacerbaciones moderadas o graves

En el estudio que incluye específicamente pacientes con agudizaciones previas<sup>4</sup>, el tratamiento con glicopirronio + indacaterol mostró una tasa anual de exacerbaciones moderadas o graves menor

respecto a la terapia combinada (RR, 0,83; IC del 95%, 0,75-0,91;  $p < 0,001$ ).  
La confianza en este resultado es alta.

Pacientes con al menos 1 exacerbación

En el estudio que incluye específicamente pacientes con agudizaciones previas<sup>4</sup>, el tratamiento con glicopirronio + indacaterol mostró un menor porcentaje de pacientes que presentó al menos 1 exacerba-

ción respecto al tratamiento combinado (RR: 0,94; IC del 95%, 0,91-0,97).  
La confianza en este resultado es alta.

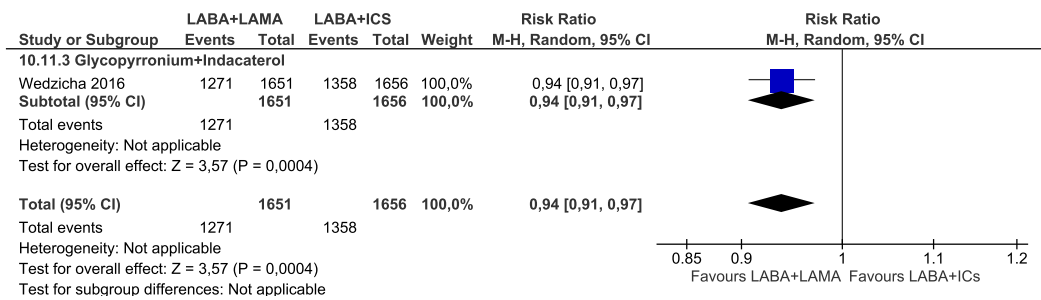

Figura 4. Resultados en relación con los pacientes con al menos 1 exacerbación.

Síntomas: TDI puntuación total a la semana 12

En el análisis conjunto, el tratamiento con doble broncodilatación no mejora los síntomas evaluados con el índice de disnea transicional (TDI) (puntuación total a las 12 semanas) en comparación con el tratamiento combinado, aunque el resultado conjunto está al límite de la significación (MD: 0,18 puntos; IC del 95%, -0,02 a 0,37 puntos más).

Los estudios que evaluaron glicopirronio + indacaterol frente a tratamiento combinado muestran una mejoría significativa de los síntomas en comparación con el tratamiento combinado (2 ECA; MD: 0,36

puntos; IC del 95%, 0,05-0,66), aunque no se descarta que la diferencia pueda ser clínicamente irrelevante.

En las otras comparaciones de doble broncodilatación (umeclidinio + vilanterol y aclidinio + formoterol), no se encontraron diferencias significativas en la mejoría de los síntomas respecto al tratamiento combinado.

La confianza en estos resultados es moderada (por imprecisión).

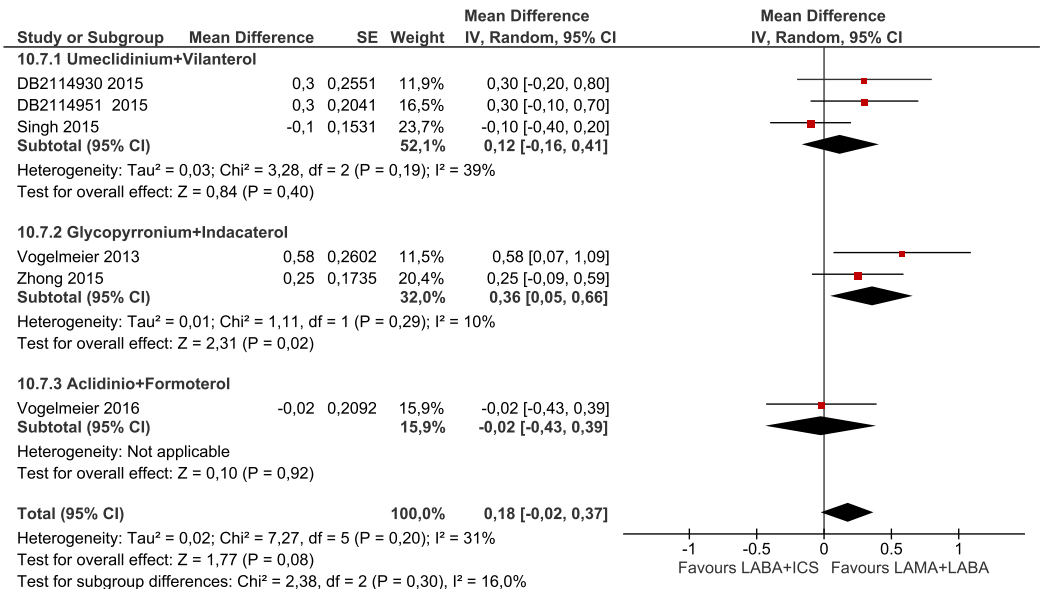

Figura 5. Resultados en relación con los síntomas: TDI puntuación total a la semana 12.

EFFECTOS ADVERSOS

Pacientes con eventos adversos graves

En el análisis conjunto, no se encuentran diferencias significativas entre el tratamiento con doble broncodilatación y el tratamiento combinado por lo que se refiere a las personas con efectos indeseables graves (RR: 0,91; IC del 95%, 0,81-1,03).

Los estudios que evaluaron glicopirronio + indacaterol frente a tratamiento combinado muestran una reducción al margen de la signifi-

cación para este desenlace (3 ECA [804 eventos]; RR: 0,83; IC del 95%, 0,63-1,11).

La confianza en estos resultados es moderada, por el escaso número de eventos en algunas comparaciones.

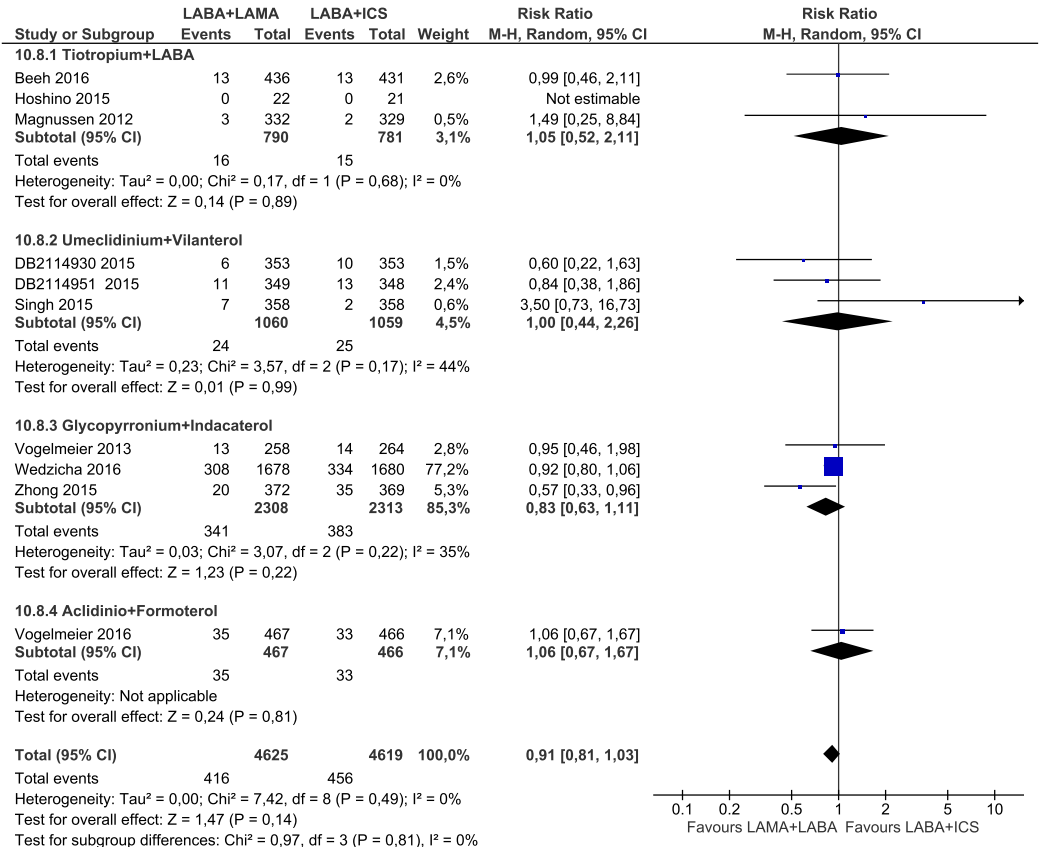

Figura 6. Resultados en relación con los pacientes con eventos adversos graves.

Mortalidad global

No hay diferencias entre el tratamiento con doble broncodilatación y el tratamiento combinado por lo que se refiere a mortalidad, aunque el tiempo de seguimiento y el número de eventos para alguno de los estudios fueron escasos (RR: 1,08; IC del 95%, 0,66-1,76; 1 paciente más por 1.000, de 2 menos a 5 más).

La confianza en los resultados es moderada excepto para tiotropio + LABA, que es baja.

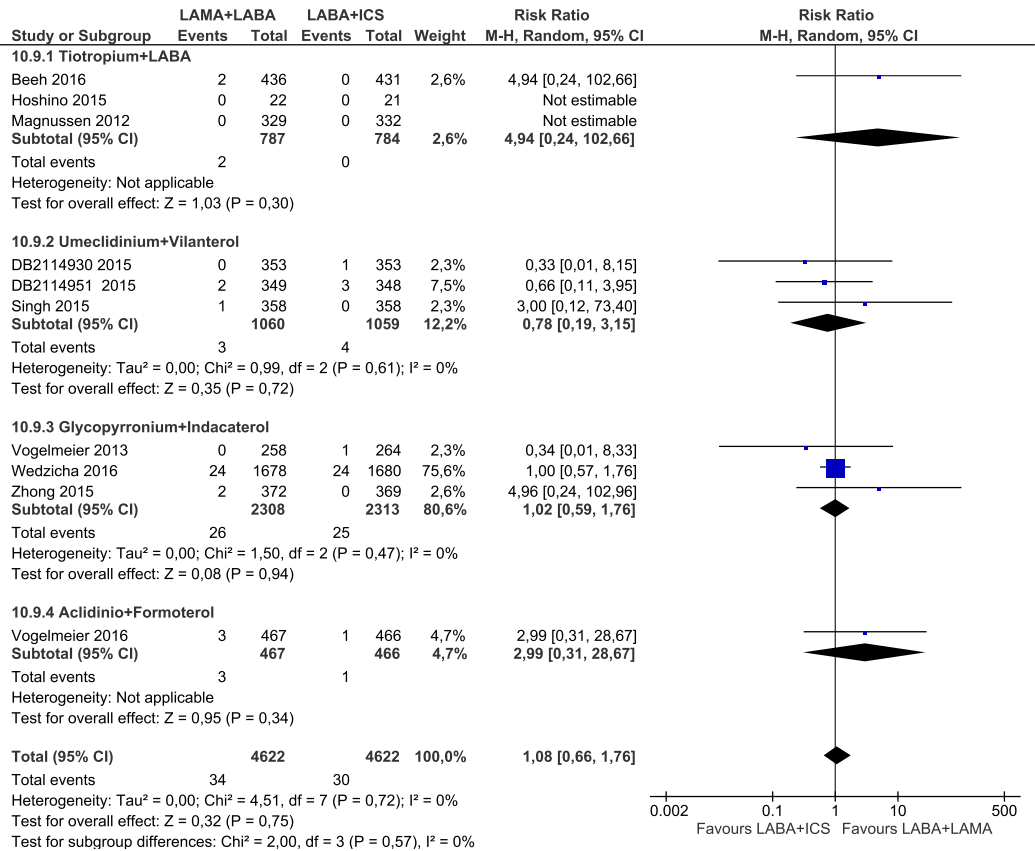

Figura 7. Resultados en relación con la mortalidad global.

**Balance riesgo/beneficio**

De forma general, el tratamiento con doble broncodilatación mejora la funcionalidad respiratoria (FEV<sub>1</sub>) en comparación con el tratamiento combinado, sin una mejoría significativa de los síntomas (evaluados con la escala TDI) o la calidad de vida (evaluados con la escala SGRQ). Los efectos adversos graves son parecidos en las 2 estrategias de tratamiento. La magnitud de los efectos, de forma general, es pequeña. No obstante, el tratamiento combinado LABA/CI presenta un mayor riesgo de neumonía que el tratamiento con doble broncodilatación.

Un desenlace clave considerado por el grupo elaborador de la guía es la frecuencia de exacerbaciones. Tras la búsqueda de evidencia, solo se ha encontrado 1 estudio con un diseño apropiado para medir este resultado<sup>4</sup>. En este estudio se hace referencia a una de las 3 posibles asociaciones de doble broncodilatación existentes en el mercado, que es indacaterol + glicopirronio; por lo tanto, no es posible realizar una recomendación amplia para responder a la pregunta de si la doble broncodilatación es superior o no a la terapia combinada en el control a largo plazo de la EPOC.

En el estudio<sup>4</sup>, que incluye específicamente pacientes con al menos una agudización el año previo, la doble broncodilatación con glicopirronio + indacaterol muestra mejores resultados en relación con las exacerbaciones que el tratamiento combinado (tiempo hasta la primera exacerbación y frecuencia de exacerbaciones), además de probables mejores resultados en funcionalidad respiratoria y calidad de vida.

Sería razonable considerar preferiblemente la doble broncodilatación (LABA/LAMA) al tratamiento combinado (LABA/CI) en los casos en que se requiera reforzar el tratamiento inhalado en pacientes con monoterapia y un pobre control clínico, especialmente en los pacientes con agudizaciones previas.

La confianza en estos resultados es limitada, porque no se encuentra evidencia suficiente para todos los desenlaces y la magnitud del efecto de la intervención puede no ser clínicamente relevante en otros.

**Recomendaciones**

**Débil a favor**

En pacientes sintomáticos, a pesar de un tratamiento con un broncodilatador de acción prolongada y en especial si presentan agudiza-

ciones, el tratamiento con doble broncodilatación (LABA/LAMA) es de elección frente al tratamiento combinado (LABA/CI).

Tabla 13.1. Resumen de conclusiones

|                              | Judgement                            |                                               |                                                          |                                         |                         |        |                               |
|------------------------------|--------------------------------------|-----------------------------------------------|----------------------------------------------------------|-----------------------------------------|-------------------------|--------|-------------------------------|
| <b>Desirable effects</b>     | Trivial                              | <b>Small</b>                                  | Moderate                                                 | Large                                   |                         | Varies | Don't know                    |
| <b>Undesirable effects</b>   | Large                                | Moderate                                      | <b>Small</b>                                             | Trivial                                 |                         | Varies | Don't know                    |
| <b>Certainty of evidence</b> | Very low                             | Low                                           | <b>Moderate</b>                                          | High                                    |                         |        | No included studies           |
| <b>Values</b>                | Important uncertainty or variability | Possibly important uncertainty or variability | Probably no important uncertainty or variability         | No important uncertainty or variability |                         |        | No known undesirable outcomes |
| <b>Balance of effects</b>    | Favors the comparison                | <b>Probably favors the comparison</b>         | Does not favor either the intervention or the comparison | Probably favors the intervention        | Favors the intervention | Varies | Don't know                    |
| <b>Resources required</b>    | Large costs                          | Moderate costs                                | Negligible costs and savings                             | Moderate savings                        | Large savings           | Varies | Don't know                    |
| <b>Acceptability</b>         | No                                   | Probably no                                   | Probably yes                                             | Yes                                     |                         | Varies | Don't know                    |
| <b>Feasibility</b>           | No                                   | Probably no                                   | Probably yes                                             | Yes                                     |                         | Varies | Don't know                    |

Tabla 13.2. Resumen de los estudios de comparación entre tratamiento combinado y doble broncodilatación

| Outcomes                                                          |                                            | N° of participants (studies) | Quality of the evidence (GRADE) | Relative effect (95% CI)              | Risk difference with LABA + LAMA                                                                                                                           |
|-------------------------------------------------------------------|--------------------------------------------|------------------------------|---------------------------------|---------------------------------------|------------------------------------------------------------------------------------------------------------------------------------------------------------|
| <b>Trough FEV<sub>1</sub></b>                                     | LAMA + LABA vs. LABA + CI                  | (9 RCTs)                     | ⊕⊕⊕⊕<br>HIGH                    |                                       | MD <b>0.07 litres more</b><br>(0.06 more to 0.09 more)                                                                                                     |
|                                                                   | Tiotropium + LABA vs. LABA + CI            | (2 RCTs)                     | ⊕⊕⊕○<br>MODERATE <sup>1</sup>   | -                                     | MD <b>0.05 litres more</b><br>(0.04 more to 0.06 more)                                                                                                     |
|                                                                   | Umeclidinium + Vilanterol vs. LABA + CI    | (3 RCTs)                     | ⊕⊕⊕⊕<br>HIGH                    | -                                     | MD <b>0.09 litres more</b><br>(0.07 more to 0.11 more)                                                                                                     |
|                                                                   | Glycopyrronium + Indacaterol vs. LABA + CI | (3 RCTs)                     | ⊕⊕⊕⊕<br>HIGH                    | -                                     | MD <b>0.07 litres more</b><br>(0.05 more to 0.08 more)                                                                                                     |
|                                                                   | Aclidinium + Formoterol vs. LABA + CI      | (1 RCT)                      | ⊕⊕⊕⊕<br>HIGH                    | -                                     | MD <b>0.09 litres more</b><br>(0.07 more to 0.12 more)                                                                                                     |
| <b>SGRQ total score</b>                                           | Tiotropium + LABA vs. LABA + CI            | (1 RCT)                      | ⊕⊕○○<br>LOW <sup>1</sup>        | -                                     | MD <b>5 points fewer</b><br>(7.16 fewer to 2.84 fewer)                                                                                                     |
|                                                                   | Umeclidinium + Vilanterol vs. LABA + CI    | (3 RCTs)                     | ⊕⊕⊕○<br>MODERATE <sup>2</sup>   | -                                     | MD <b>0.08 points fewer</b><br>(1.35 fewer to 1.18 more)                                                                                                   |
|                                                                   | Glycopyrronium + Indacaterol vs. LABA + CI | (3 RCTs)                     | ⊕⊕⊕○<br>MODERATE <sup>2</sup>   | -                                     | MD <b>0.6 points fewer</b><br>(1.78 fewer to 0.57 more)                                                                                                    |
|                                                                   | Aclidinium + Formoterol vs. LABA + CI      | (1 RCT)                      | ⊕⊕⊕○<br>MODERATE <sup>2</sup>   |                                       | Mean improvements in SGRQ total scores (week 24) were similar with aclidinium/formoterol or salmeterol/fluticasone (-4.7 and -5.7, respectively; p = 0.27) |
| <b>Patients with ≥ 4 points in SGRQ improvement</b>               | Glycopyrronium + Indacaterol vs. LABA + CI | 3663<br>(2 RCTs)             | ⊕⊕⊕⊕<br>HIGH                    | <b>RR 1.13</b><br>(1.05 to 1.21)      | <b>58 more per 1000</b><br>(22 more to 93 more)<br><b>NNT = 18</b>                                                                                         |
|                                                                   | Aclidinium + Formoterol vs. LABA + CI      | (1 RCT)                      | ⊕⊕⊕○<br>MODERATE <sup>2</sup>   | <b>RR: 0.94</b><br>(0.84 to 1.06)     | <b>33 fewer per 1000</b><br>(89 fewer to 33 more)                                                                                                          |
| <b>Time to first moderate or severe COPD exacerbation</b>         | Glycopyrronium + Indacaterol vs. LABA + CI | 3307<br>(1 RCTs)             | ⊕⊕⊕⊕<br>HIGH                    | <b>HR 0.78</b> (0.70 to 0.86)         |                                                                                                                                                            |
| <b>Annual rate ratio of moderate or severe exacerbations</b>      | Glycopyrronium + Indacaterol vs. LABA + CI | 3307<br>(1 RCTs)             | ⊕⊕⊕⊕<br>HIGH                    | <b>Rate ratio 0.83</b> (0.75 to 0.91) |                                                                                                                                                            |
| <b>Patients with at least one moderate or severe exacerbation</b> | Glycopyrronium + Indacaterol vs. LABA + CI | 3307<br>(1 RCTs)             | ⊕⊕⊕⊕<br>HIGH                    | <b>RR 0.94</b><br>(0.91 to 0.97)      | <b>49 fewer per 1000</b><br>(74 fewer to 25 fewer)<br><b>NNT = 20s</b>                                                                                     |

Tabla 13.2. Resumen de los estudios de comparación entre tratamiento combinado y doble broncodilatación (cont.)

| Outcomes                   |                                            | N° of participants (studies) | Quality of the evidence (GRADE) | Relative effect (95% CI)           | Risk difference with LABA + LAMA                                        |
|----------------------------|--------------------------------------------|------------------------------|---------------------------------|------------------------------------|-------------------------------------------------------------------------|
| TDI total score at week 12 | LAMA + LABA vs. LABA + CI                  | (6 RCTs)                     | ⊕⊕⊕○<br>MODERATE <sup>2</sup>   |                                    | MD <b>0.18 points more</b><br>(0.02 fewer to 0.37 more)                 |
|                            | Umeclidinium + Vilanterol vs. LABA + CI    | (3 RCTs)                     |                                 | -                                  | MD <b>0.12 points more</b><br>(0.16 fewer to 0.41 more)                 |
|                            | Glycopyrronium + Indacaterol vs. LABA + CI | (2 RCTs)                     |                                 |                                    | MD <b>0.36 points more</b><br>(0.05 more to 0.66 more)                  |
|                            | Acridinium + Formoterol vs. LABA + CI      | (1 RCTs)                     |                                 |                                    | MD 0.02 points less<br>(0.43 fewer to 0.39 more)                        |
| Patients with SAE          | LAMA + LABA vs. LABA + CI                  | 9244<br>(10 RCTs)            | ⊕⊕⊕○<br>MODERATE <sup>2</sup>   | <b>RR 0.91</b><br>(0.81 to 1.03)   | <b>9 fewer per 1000</b><br>(19 fewer to 3 more)                         |
|                            | Tiotropium + LABA vs. LABA + CI            | 1571<br>(3 RCTs)             |                                 | <b>RR 1.05</b><br>(0.52 to 2.11)   | <b>1 more per 1000</b><br>(9 fewer to 21 more)                          |
|                            | Umeclidinium + Vilanterol vs. LABA + CI    | 2119<br>(3 RCTs)             |                                 | <b>RR 1.00</b><br>(0.44 to 2.26)   | <b>0 fewer per 1000</b><br>(13 fewer to 30 more)                        |
|                            | Glycopyrronium + Indacaterol vs. LABA + CI | 4621<br>(3 RCTs)             |                                 | <b>RR 0.83</b><br>(0.63 to 1.11)   | <b>28 fewer per 1000</b><br>(61 fewer to 18 more)                       |
|                            | Acridinium + Formoterol vs. LABA + CI      | 933<br>(1 RCT)               |                                 | <b>RR 1.06</b><br>(0.67 to 1.67)   | <b>4 more per 1000</b><br>(23 fewer to 47 more)                         |
| Overall mortality          | LAMA + LABA vs. LABA + CI                  | 9244<br>(10 RCT)             | ⊕⊕⊕○<br>MODERATE <sup>2</sup>   | <b>RR 1.08</b><br>(0.66 to 1.76)   | <b>1 more per 1000</b><br>(2 fewer to 5 more)                           |
|                            | Tiotropium + LABA vs. LABA + CI            | 1571<br>(3 RCTs)             |                                 | <b>RR 4.94</b><br>(0.24 to 102.66) | <b>Not estimable</b><br>2 events double BD<br>0 events combined therapy |
|                            | Umeclidinium + Vilanterol vs. LABA + CI    | 2119<br>(3 RCTs)             |                                 | <b>RR 0.78</b><br>(0.19 to 3.15)   | <b>1 fewer per 1000</b><br>(3 fewer to 8 more)                          |
|                            | Glycopyrronium + Indacaterol vs. LABA + CI | 4621<br>(3 RCTs)             |                                 | <b>RR 1.02</b><br>(0.59 to 1.76)   | <b>0 fewer per 1000</b><br>(4 fewer to 8 more)                          |
|                            | Acridinium + Formoterol vs. LABA + CI      | 933<br>(1 RCT)               |                                 | <b>RR 2.99</b><br>(0.31 to 28.67)  | <b>4 more per 1000</b><br>(1 fewer to 59 more)                          |

<sup>1</sup> Hoshino 2015 is an open label study<sup>5</sup>.<sup>2</sup> 95% IC boundaries includes both potential harms or benefits.

## Referencias

- \*Horita N, Miyazawa N, Tomaru K, Inoue M, Kaneko T. Long-acting muscarinic antagonist + long-acting beta agonist versus long-acting beta agonist + inhaled corticosteroid for COPD: A systematic review and meta-analysis. *Respirology*. 2015;20:1153-9.
- \*\*Beeh KM, Derom E, Echave-Sustaeta J, Grönke L, Hamilton A, Zhai D, et al. The lung function profile of once-daily tiotropio and olodaterol via Respimat is superior to that of twice-daily salmeterol and fluticasone propionate via Accuhaler (ENERGITO study). *Int J Chron Obstruct Pulmon Dis*. 2016;11:193-205.
- \*\*\*Vogelmeier C, Paggiaro PL, Dorca J, Sliwinski P, Mallet M, Kirsten AM, et al. Efficacy and safety of acridinium/formoterol versus salmeterol/fluticasone: a phase 3 COPD study. *Eur Respir J*. 2016;48:1030-9.
- \*\*\*Wedzicha JA, Banerji D, Chapman KR, Vestbo J, Roche N, Ayers RT, et al; FLAME Investigators. Indacaterol-glicopirronio versus salmeterol-fluticasone for COPD. *N Engl J Med*. 2016;374(23):2222-34.
- \*\*Hoshino M, Ohtawa J, Akitsu K. Comparison of airway dimensions with once daily tiotropio plus indacaterol versus twice daily Advair(®) in chronic obstructive pulmonary disease. *Pulm Pharmacol Ther*. 2015;30:128-33.
- \*\*Magnussen H, Paggiaro P, Schmidt H, Kesten S, Metzendorf N, Maltais F. Effect of combination treatment on lung volumes and exercise endurance time in COPD. *Respir Med*. 2012;106:1413-20.
- \*\*\*\*Singh D, Worsley S, Zhu C-Q, Hardaker L, Church A. Umeclidinium/vilanterol versus fluticasone propionate/salmeterol in COPD: a randomised trial. *BMC Pulm Med*. 2015;15:91.
- \*\*\*\*Donohue JF, Worsley S, Zhu CQ, Hardaker L, Church A. Improvements in lung function with umeclidinium/vilanterol versus fluticasone propionate/salmeterol in patients with moderate-to-severe COPD and infrequent exacerbations. *Respir Med*. 2015;109:870-81.
- \*\*\*\*Zhong N, Wang X, Zhou N, Zhang F, Patalano F, Humphries M, et al. Efficacy and safety of once-daily QVA149 compared with twice-daily salmeterol/fluticasone combination (SFC) in patients with COPD: the LANTERN study. *Int J Chron Obstruct Pulmon Dis*. 2015;10:1015-26.
- \*\*\*\*Vogelmeier CF, Bateman ED, Pallante J, Alagappan VK, D'Andrea P, Chen H, et al. Efficacy and safety of once-daily QVA149 compared with twice-daily salmeterol-fluticasone in patients with chronic obstructive pulmonary disease (ILLUMINATE): a randomised, double-blind, parallel group study. *Lancet Respir Med*. 2013;1:51-60.

\*Revisión sistemática.

\*\*Tiotropio + LABA.

\*\*\*Acridinio + formoterol.

\*\*\*\*Glicopirronio + indacaterol.

\*\*\*\*\*Umeclidinium + vilanterol.



# Mucolíticos en la prevención de exacerbaciones de la EPOC

## P14. Pregunta para responder:

En los pacientes con EPOC estable, ¿se deben usar los mucolíticos para prevenir las exacerbaciones?

La EPOC puede cursar con hipersecreción mucosa excesiva o espesa. Los mucolíticos son fármacos que reducen la viscosidad del esputo, por lo que pueden facilitar su expectoración. Algunos mucolíticos, como la N-acetilcisteína (NAC), presentan, además, un efecto antioxidante que podría ser útil en los pacientes con EPOC.

Debido a estas propiedades, el tratamiento de mantenimiento con estos agentes podría, potencialmente, disminuir la sintomatología asociada y prevenir las exacerbaciones. Para responder a esta pregunta se seleccionaron estudios que tenían un seguimiento mínimo de 1 año.

Se identificó una revisión sistemática relevante<sup>1</sup>, que incluye 4 ECA con un tiempo de seguimiento de 1 a 3 años<sup>2-5</sup>. Posteriormente se identificaron 2 ECA adicionales<sup>6,7</sup>.

Los 6 estudios son ensayos aleatorizados, controlados con placebo y realizados en pacientes adultos con EPOC. Uno de los criterios de inclusión era el número mínimo de exacerbaciones por año. Este número podía ser, como mínimo, un episodio durante el año previo<sup>3</sup>, 2 durante los 2 años previos<sup>5,7</sup> o 2 por año durante los 2 años previos<sup>2</sup>. En 2 ECA no se establecía un número mínimo, en 1 ECA<sup>6</sup> ambos grupos tenían de media 2 exacerbaciones por 1 (rango, 1 a 4) y en otro<sup>4</sup>, la media de exacerbaciones por año era 0,87 (desviación estándar [DE]: 0,75) en el grupo de intervención y de 0,90 (DE: 0,81) en el de placebo.

Los agentes mucolíticos estudiados fueron NAC (4 ECA), ambroxol (1 ECA) y carbocisteína (1 ECA).

## MUCOLÍTICOS FRENTE A PLACEBO

|            |                  |
|------------|------------------|
| Reingresos | Calidad moderada |
|------------|------------------|

En el análisis conjunto de los datos (3 ECA), la terapia con mucolíticos muestra una disminución en el número de reingresos respecto al placebo (riesgo relativo [RR]: 0,76 [0,59-0,97]; 44 pacientes menos por 1.000, de 5 menos a 74 menos; 264 eventos).

La confianza en este resultado es moderada por la probable imprecisión del efecto global de la intervención; el margen superior no excluye resultados que puedan no ser relevantes clínicamente.

|                                                                      |                  |
|----------------------------------------------------------------------|------------------|
| Exacerbaciones de la EPOC: tasa anual de exacerbaciones por paciente | Calidad moderada |
|----------------------------------------------------------------------|------------------|

En el análisis conjunto de los datos (4 ECA), la terapia con mucolíticos reduce de forma significativa la tasa anual de exacerbaciones en un 21% respecto al placebo (RR: 0,79 [0,65-0,95]).

La confianza en este resultado es moderada, por la variabilidad de los resultados.

|                                                                                           |                  |
|-------------------------------------------------------------------------------------------|------------------|
| Exacerbaciones de la EPOC: tasa anual de exacerbaciones por paciente (usando dosis altas) | Calidad moderada |
|-------------------------------------------------------------------------------------------|------------------|

Analizando conjuntamente los estudios que utilizan dosis altas (2 ECA), la terapia con mucolíticos reduce de forma significativa la tasa anual de exacerbaciones en un 31% respecto al placebo (RR: 0,69 [0,50-0,94]).

La confianza en este resultado es moderada, por la variabilidad de los resultados.

|                                                                                           |              |
|-------------------------------------------------------------------------------------------|--------------|
| Exacerbaciones de la EPOC: tasa anual de exacerbaciones por paciente (usando dosis bajas) | Calidad baja |
|-------------------------------------------------------------------------------------------|--------------|

Analizando conjuntamente los estudios que utilizan dosis bajas (2 ECA), la terapia con mucolíticos no muestra diferencias en la tasa anual de exacerbaciones respecto al placebo (RR: 0,87 [0,66-1,14]).

La confianza en este resultado es baja, por la variabilidad y la imprecisión de los resultados.

|                                                                             |              |
|-----------------------------------------------------------------------------|--------------|
| Exacerbaciones de la EPOC: porcentaje de pacientes libres de exacerbaciones | Calidad alta |
|-----------------------------------------------------------------------------|--------------|

En el análisis conjunto de los datos (5 ECA), la terapia con mucolíticos no muestra diferencias en el porcentaje de pacientes libres de exacerbaciones respecto al placebo (RR: 1,06 [0,95-1,19]; 2.205 pacientes).

La confianza en este resultado es alta.

|                                        |              |
|----------------------------------------|--------------|
| Calidad de vida: SGRQ puntuación total | Calidad baja |
|----------------------------------------|--------------|

El Saint George's Respiratory Questionnaire (SGRQ) arroja puntuaciones entre 0 y 100; puntuaciones más altas indican peor calidad de vida.

No se han obtenido los resultados conjuntos de los 4 ECA que evaluaron este desenlace. En 2 estudios<sup>2,7</sup>, no se aportan los datos suficientes. En otros 2 estudios<sup>5,6</sup>, los resultados son muy variables y se ha optado por no presentar los resultados agregados.

*Cambio a las 52 semanas*

Decramer et al (2005)<sup>2</sup>: NAC, -3,76 (intervalo de confianza [IC] del 95%, -5,55 a -1,98); placebo, -4,95 (IC del 95%, -6,74 a -3,16; p = 0,358).

Zheng et al (2008)<sup>5</sup>: carbocisteína, -4,6 ± 16,43; placebo, -0,05 ± 19,01 (p = 0,130).

Tse et al (2013)<sup>6</sup>: NAC, -3,3 ± 2,1; placebo, -7,4 ± 2,2 (p = 0,19).

Zheng et al (2014)<sup>7</sup>: NAC 1.200 mg frente a placebo (MD: -1,22; IC del 95%, -3,60 a 1,15; p = 0,312).

EFFECTOS ADVERSOS

|                                   |                  |
|-----------------------------------|------------------|
| Eventos adversos (cualquier tipo) | Calidad moderada |
|-----------------------------------|------------------|

En el análisis conjunto de los datos (4 ECA), la terapia con mucolíticos no muestra diferencias en el número de eventos adversos respecto al placebo (RR: 1,11 [0,91-1,35]; 284 eventos).

La confianza en este resultado es moderada, por la imprecisión en los resultados.

|            |                  |
|------------|------------------|
| Mortalidad | Calidad moderada |
|------------|------------------|

En el análisis conjunto de los datos (5 ECA), la terapia con mucolíticos no muestra diferencias en mortalidad respecto al placebo (RR: 1,15 [0,55-2,43]; 30 eventos).

La confianza en este resultado es moderada, por la imprecisión en los resultados.

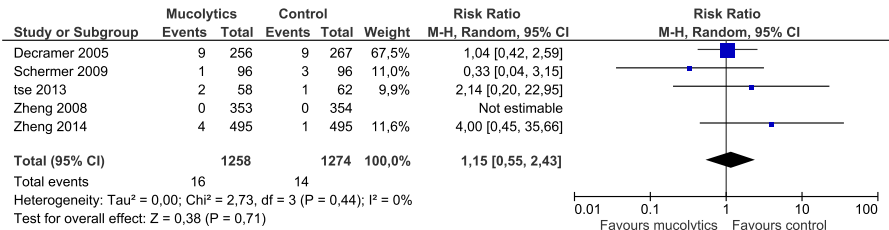

Figura 1. Resultados en relación con la mortalidad.

|                          |                         |
|--------------------------|-------------------------|
| Balance riesgo/beneficio | Calidad global moderada |
|--------------------------|-------------------------|

El tratamiento con mucolíticos con intención preventiva en pacientes con EPOC de moderada a grave reduce la tasa anual de exacerbaciones moderadas. Este efecto parece ser dependiente de la dosis: solo se evidencia esta disminución en los estudios que utilizan dosis altas, pero no implica un incremento en el porcentaje de pacientes libres de exacerbación. También la terapia con mucolíticos ha mostrado disminuir los reingresos respecto al placebo.

No se observan diferencias en la frecuencia de eventos adversos ni en la mortalidad respecto al placebo. Los resultados sobre la calidad de vida son muy variables.

La confianza de la evidencia es moderada, por la imprecisión de los efectos de la intervención.

Existe incertidumbre sobre el efecto del antecedente de uso de corticoides inhalados. Este se ha asociado a una disminución en la efi-

cacia del tratamiento. En los estudios revisados, los resultados no son consistentes respecto a la importancia de este factor.

Actualmente, los mucolíticos están excluidos de la financiación por el sistema nacional de salud, con lo cual la prescripción de estos agentes generará un gasto directo para el paciente. Este aspecto puede influir en la aceptabilidad y el cumplimiento de un tratamiento a largo plazo.

En pacientes con EPOC de moderada a grave con exacerbaciones frecuentes, el tratamiento con mucolíticos podría presentar más beneficios que inconvenientes.

|                        |                                               |
|------------------------|-----------------------------------------------|
| <b>Recomendaciones</b> | <b>Condicional a favor de la intervención</b> |
|------------------------|-----------------------------------------------|

En pacientes con EPOC fenotipo agudizador, a pesar de un tratamiento adecuado, se sugiere añadir un mucolítico a dosis altas.

**Especificaciones:** se debe discutir con el paciente los costes asociados al tratamiento con agentes mucolíticos.

Tabla 14.1. Resumen de conclusiones

|                              | Judgement                            |                                                      |                                                          |                                         |                         |        |                               |
|------------------------------|--------------------------------------|------------------------------------------------------|----------------------------------------------------------|-----------------------------------------|-------------------------|--------|-------------------------------|
| <b>Desirable effects</b>     | Trivial                              | <b>Small</b>                                         | <b>Moderate</b>                                          | Large                                   |                         | Varies | Don't know                    |
| <b>Undesirable effects</b>   | Large                                | Moderate                                             | Small                                                    | <b>Trivial</b>                          |                         | Varies | Don't know                    |
| <b>Certainty of evidence</b> | Very low                             | Low                                                  | <b>Moderate</b>                                          | High                                    |                         |        | No included studies           |
| <b>Values</b>                | Important uncertainty or variability | <b>Possibly important uncertainty or variability</b> | Probably no important uncertainty or variability         | No important uncertainty or variability |                         |        | No known undesirable outcomes |
| <b>Balance of effects</b>    | Favors the comparison                | Probably favors the comparison                       | Does not favor either the intervention or the comparison | Probably favors the intervention        | Favors the intervention | Varies | Don't know                    |
| <b>Resources required</b>    | Large costs                          | <b>Moderate costs</b>                                | Negligible costs and savings                             | Moderate savings                        | Large savings           | Varies | Don't know                    |
| <b>Acceptability</b>         | No                                   | Probably no                                          | Probably yes                                             | Yes                                     |                         | Varies | Don't know                    |
| <b>Feasibility</b>           | No                                   | Probably no                                          | Probably yes                                             | Yes                                     |                         | Varies | Don't know                    |

Tabla 14.2. Resumen de los estudios sobre mucolíticos en la prevención de las agudizaciones de la EPOC

| Quality assessment                                                                                                              |                           |                |                      |                |                      |                      | N° of patients      |                     | Effect                                  |                                                          | Quality               | Importance |
|---------------------------------------------------------------------------------------------------------------------------------|---------------------------|----------------|----------------------|----------------|----------------------|----------------------|---------------------|---------------------|-----------------------------------------|----------------------------------------------------------|-----------------------|------------|
| N° of studies                                                                                                                   | Study design              | Risk of bias   | Inconsistency        | Indirectness   | Imprecision          | Other considerations | Mucolytics          | Control             | Relative (95% CI)                       | Absolute (95% CI)                                        |                       |            |
| Hospitalizations (assessed with: proportion of patients hospitalized)                                                           |                           |                |                      |                |                      |                      |                     |                     |                                         |                                                          |                       |            |
| 3                                                                                                                               | ran-<br>domised<br>trials | not<br>serious | not<br>serious       | not<br>serious | serious <sup>1</sup> | none                 | 114/810<br>(14.1%)  | 150/827<br>(18.1%)  | RR 0.76<br>(0.59 to<br>0.97)            | 44 fewer<br>per 1000<br>(from 5<br>fewer to<br>74 fewer) | ⊕⊕⊕○<br>MODE-<br>RATE | CRITICAL   |
| COPD exacerbations rate (assessed with: number of exacerbations per patient per year)                                           |                           |                |                      |                |                      |                      |                     |                     |                                         |                                                          |                       |            |
| 4                                                                                                                               | ran-<br>domised<br>trials | not<br>serious | serious <sup>2</sup> | not<br>serious | not<br>serious       | none                 |                     |                     | Rate ratio<br>0.79<br>(0.65 to<br>0.95) |                                                          | ⊕⊕⊕○<br>MODE-<br>RATE | CRITICAL   |
| COPD exacerbations rate - SUBGROUP using high doses of mucolytics (assessed with: number of exacerbations per patient per year) |                           |                |                      |                |                      |                      |                     |                     |                                         |                                                          |                       |            |
| 2                                                                                                                               | ran-<br>domised<br>trials | not<br>serious | serious <sup>2</sup> | not<br>serious | not<br>serious       | none                 |                     |                     | Rate ratio<br>0.69<br>(0.50 to<br>0.94) |                                                          | ⊕⊕⊕○<br>MODE-<br>RATE | CRITICAL   |
| COPD exacerbations rate - SUBGROUP using low doses of mucolytics (assessed with: number of exacerbations per patient per year)  |                           |                |                      |                |                      |                      |                     |                     |                                         |                                                          |                       |            |
| 2                                                                                                                               | ran-<br>domised<br>trials | not<br>serious | serious <sup>2</sup> | not<br>serious | serious <sup>1</sup> | none                 |                     |                     | Rate ratio<br>0.87<br>(0.66 to<br>1.14) |                                                          | ⊕⊕○○<br>LOW           | CRITICAL   |
| COPD exacerbations (assessed with: proportion of patients FREE of exacerbations)                                                |                           |                |                      |                |                      |                      |                     |                     |                                         |                                                          |                       |            |
| 5                                                                                                                               | ran-<br>domised<br>trials | not<br>serious | not<br>serious       | not<br>serious | not<br>serious       | none                 | 375/1098<br>(34.2%) | 359/1107<br>(32.4%) | RR 1.06<br>(0.95 to<br>1.19)            | 19 more<br>per 1000<br>(from 16<br>fewer to<br>62 more)  | ⊕⊕⊕⊕<br>HIGH          | CRITICAL   |

Tabla 14.2. Resumen de los estudios sobre mucolíticos en la prevención de las agudizaciones de la EPOC (cont.)

| Quality assessment                                                           |                   |              |                      |              |                      |                      | N° of patients                                                                                                                                                                                                                                                                                      |                 | Effect                 |                                             | Quality          | Importance |
|------------------------------------------------------------------------------|-------------------|--------------|----------------------|--------------|----------------------|----------------------|-----------------------------------------------------------------------------------------------------------------------------------------------------------------------------------------------------------------------------------------------------------------------------------------------------|-----------------|------------------------|---------------------------------------------|------------------|------------|
| N° of studies                                                                | Study design      | Risk of bias | Inconsistency        | Indirectness | Imprecision          | Other considerations | Mucolytics                                                                                                                                                                                                                                                                                          | Control         | Relative (95% CI)      | Absolute (95% CI)                           |                  |            |
| Quality of life (assessed with: SGRQ total score )                           |                   |              |                      |              |                      |                      |                                                                                                                                                                                                                                                                                                     |                 |                        |                                             |                  |            |
| 4                                                                            | randomised trials | not serious  | serious <sup>2</sup> | not serious  | serious <sup>3</sup> | none                 | Two studies (Decramer 2005 and Zheng 2014) did not report sufficient crude data to be included in the meta-analysis. When Zheng 2008 and Tse 2013 were pooled, the heterogeneity was very serious, indicating that these studies should not be pooled because doing so provides misleading results. |                 |                        | ⊕⊕○○<br>LOW                                 | CRITICAL         |            |
| Adverse events (assessed with: proportion of patients with an adverse event) |                   |              |                      |              |                      |                      |                                                                                                                                                                                                                                                                                                     |                 |                        |                                             |                  |            |
| 4                                                                            | randomised trials | not serious  | not serious          | not serious  | serious <sup>1</sup> | none                 | 149/553 (26.9%)                                                                                                                                                                                                                                                                                     | 135/557 (24.2%) | RR 1.11 (0.91 to 1.35) | 27 more per 1000 (from 22 fewer to 85 more) | ⊕⊕⊕○<br>MODERATE | IMPORTANT  |
| Mortality                                                                    |                   |              |                      |              |                      |                      |                                                                                                                                                                                                                                                                                                     |                 |                        |                                             |                  |            |
| 5                                                                            | randomised trials | not serious  | not serious          | not serious  | serious <sup>4</sup> | none                 | 16/1267 (1.3%)                                                                                                                                                                                                                                                                                      | 14/1281 (1.1%)  | RR 1.15 (0.55 to 2.43) | 2 more per 1000 (from 5 fewer to 16 more)   | ⊕⊕⊕○<br>MODERATE | IMPORTANT  |

CI: Confidence interval; RR: Risk ratio.

<sup>1</sup> Wide confidence intervals: The ends of the confidence interval for the rate ratio will likely lead to different clinical decisions.<sup>2</sup> Large variability among effect estimates. This inconsistency cannot be explained by differences in the dose of mucolytics.<sup>3</sup> Precision of the estimate could not be obtained.<sup>4</sup> Low number of events and wide 95% confidence intervals.

## Referencias

- Poole P, Chong J, Cates CJ. Mucolytic agents versus placebo for chronic bronchitis or chronic obstructive pulmonary disease. Cochrane Database Syst Rev. 2015;(7): CD001287.
- Decramer M, Rutten-van Mölken M, Dekhuijzen PN, Fabbri L. Effects of N-acetylcysteine on outcomes in chronic obstructive pulmonary disease (Bronchitis Randomized on NAC Cost-Utility Study, BRONCUS): a randomised placebo-controlled trial. Lancet. 2005;365:1552-60.
- Malerba M, Ponticelli A, Radaeli A, Bensi G, Grassi V. Effect of twelve-months therapy with oral ambroxol in preventing exacerbations in patients with COPD. Double-blind, randomized, multicenter, placebo-controlled study (the AMETHIST Trial). Pulm Pharmacol Ther. 2004;17:27-34.
- Schermer T, Chavannes N, Dekhuijzen R, Wouters E, Muris J, Akkermans R, et al. Fluticasone and N-acetylcysteine in primary care patients with COPD or chronic bronchitis. Respir Med. 2009;103:542-51.
- Zheng JP, Kang J, Huang SG, Chen P, Yao WZ, Yang L, et al. Effect of carbocisteine on acute exacerbation of chronic obstructive pulmonary disease (PEACE Study): a randomised placebo-controlled study. Lancet. 2008;371:2013-8.
- Tse HN, Raiteri L, Wong KY, Yee KS, Ng LY, Wai KY, et al. High dose N-acetylcysteine in stable COPD. The 1 year, double-blind, randomized, placebo-controlled HIACE study. Chest. 2013;144:106-18.
- Zheng JP, Wen FQ, Bai CX, Wan HY, Kang J, Chen P, et al. Twice daily N-acetylcysteine 600 mg for exacerbations of chronic obstructive pulmonary disease (PANTHEON): a randomised, double-blind placebo-controlled trial. Lancet Resp Med. 2014;2:187-94.

# Roflumilast en la prevención de las exacerbaciones de la EPOC

## P15. Pregunta para responder:

En los pacientes con EPOC, ¿se deben usar los inhibidores de la fosfodiesterasa 4 (roflumilast) para prevenir las exacerbaciones?

Se estudia la eficacia de roflumilast comparada con un placebo en la prevención de exacerbaciones en pacientes con EPOC. Se ha restringido la evaluación de los resultados en pacientes con bronquitis crónica debido a que, según el análisis de subgrupos en estudios previos, se encontró una mayor reducción en la tasa de exacerbaciones en estos pacientes.

Siguiendo este criterio, se identificaron 3 ensayos clínicos que comparan roflumilast con un placebo en pacientes con EPOC estable, con antecedentes de exacerbaciones y bronquitis crónica<sup>1,2</sup>; 2 de los estudios se publicaron juntos<sup>1</sup>.

El 68% del total de pacientes tenía obstrucción grave y en el 32% era muy grave. El 42% de pacientes tenía tratamiento previo con corticoides inhalados en 2 estudios<sup>1</sup>, y, en el otro estudio<sup>2</sup>, todos los pacientes tenían de tratamiento de base una combinación de corticoides inhalados con un broncodilatador de larga duración y mantuvieron este tratamiento durante el estudio.

Dos de los estudios requerían que los participantes tuvieran como antecedente 1 o más exacerbaciones de la EPOC el año previo<sup>1</sup> y un estudio requería que fueran de 2 a más exacerbaciones durante el año previo<sup>2</sup>.

Para el análisis de eventos adversos específicos y abandonos, se incluyeron 6 estudios adicionales publicados en 5 artículos, en los cuales se evaluó roflumilast u otros inhibidores de la fosfodiesterasa en pacientes con EPOC. Estos estudios no se limitan a pacientes con bronquitis crónica<sup>3-8</sup>.

## ROFLUMILAST FRENTE A UN PLACEBO

| Tasa anual de exacerbaciones de moderadas a graves | Calidad moderada |
|----------------------------------------------------|------------------|
|----------------------------------------------------|------------------|

En el análisis conjunto de los datos (3 estudios clínicos aleatorizados [ECA], 5.026 pacientes), la terapia con roflumilast reduce de forma significativa la tasa anualizada de exacerbaciones (paciente/año) en un 15% respecto al placebo (*rate ratio* [RR]: 0,85 [0,78-0,92]).

La confianza en este resultado es moderada, porque el margen superior del intervalo de confianza (IC) no excluye la posibilidad de que los resultados no sean clínicamente relevantes.

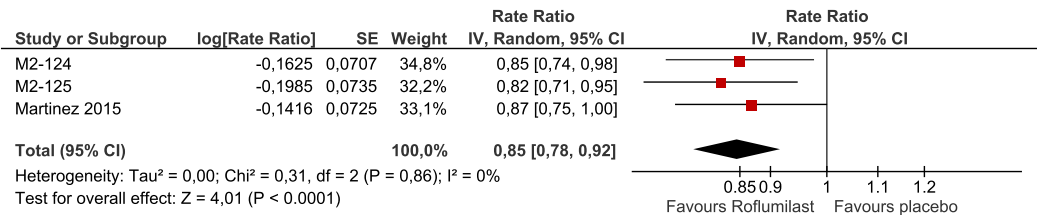

Figura 1. Resultados en relación con la tasa anual de exacerbaciones de moderadas a graves.

| Porcentaje de pacientes con al menos 1 exacerbación de moderada a grave | Calidad moderada |
|-------------------------------------------------------------------------|------------------|
|-------------------------------------------------------------------------|------------------|

En el análisis conjunto de los datos (3 ECA, 5.026 pacientes), la terapia con roflumilast disminuye de forma significativa el porcentaje de pacientes con al menos 1 exacerbación respecto al placebo (RR: 0,85 [0,78-0,93]; 38 pacientes menos por 1.000, de 18 menos a 56 menos; número necesario para tratar [NNT]: 26 [16 a 61]).

La confianza en este resultado es moderada, porque el margen superior del IC del efecto global de la intervención no excluye la posibilidad de que el efecto no sea clínicamente relevante.

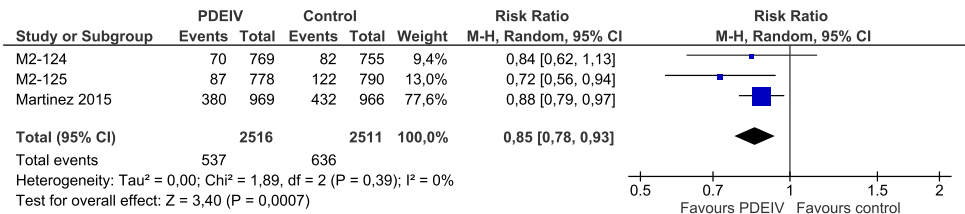

Figura 2. Resultados en relación con el porcentaje de pacientes con al menos 1 exacerbación de moderada a grave.

**Tiempo hasta la primera exacerbación**

**Calidad moderada**

En el análisis conjunto de los datos (3 ECA), la terapia con roflumilast reduce la probabilidad de presentar 1 exacerbación a lo largo del tiempo comparada con un placebo, aunque el impacto clínico puede ser marginal (*hazard ratio* [HR]: 0,90 [0,83-0,97]).

La confianza en este resultado es moderada, porque el margen superior del IC del efecto global de la intervención no excluye la posibilidad de que el efecto no sea clínicamente relevante.

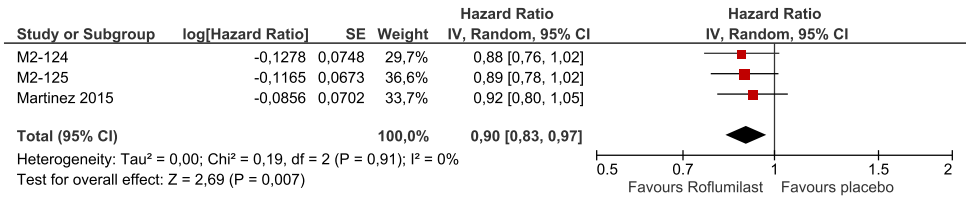

**Figura 3.** Resultados en relación con el tiempo hasta la primera exacerbación.

**Calidad de vida: cambio en la puntuación de la escala SGRQ (pacientes con EPOC)**

**Calidad alta**

Se recoge este desenlace en 2 ECA realizados en pacientes con EPOC.  
En el análisis conjunto de los datos (2 ECA, 2.229 pacientes), la terapia con roflumilast no muestra diferencias en la puntuación en calidad de vida SGRQ (Saint George's Respiratory Questionnaire) com-

rada con un placebo (diferencia media [MD]: 0,26 puntos más [1,18 menos a 1,69 más]).  
La confianza en este resultado es alta.

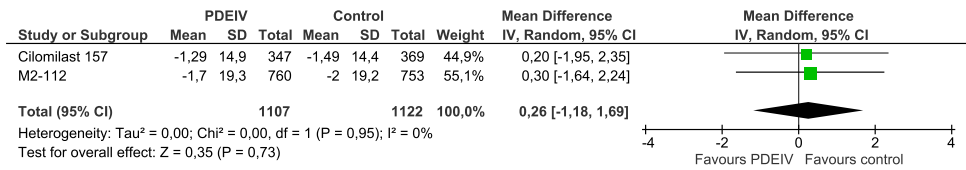

**Figura 4.** Resultados en relación con el cambio en la puntuación de la escala SGRQ.

**Función pulmonar: cambio en el volumen espiratorio forzado en el primer segundo (FEV<sub>1</sub>) posbroncodilatación (ml)**

**Calidad alta**

En el análisis conjunto de los datos (3 ECA, 4.855 pacientes), la terapia con roflumilast muestra un aumento significativo del FEV<sub>1</sub> respecto al placebo (MD: 52 ml más [40,5 más a 63,5 más]).  
La confianza en este resultado es alta.

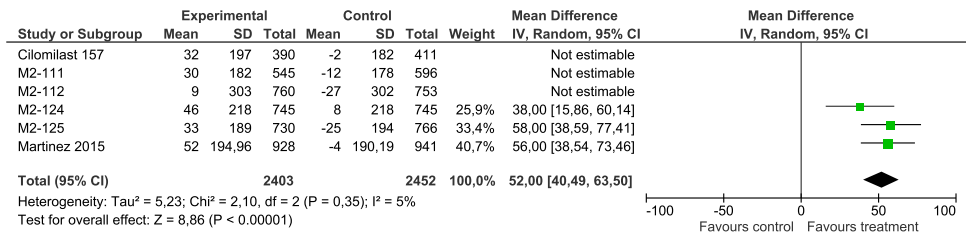

**Figura 5.** Resultados en relación con el cambio en el volumen espiratorio forzado en el primer segundo (FEV<sub>1</sub>) posbroncodilatación (ml).

**Función pulmonar: cambio en la capacidad vital forzada (FVC) (ml)**

**Calidad alta**

En el análisis conjunto de los datos (4 ECA, 4.822 pacientes), la terapia con roflumilast muestra un aumento significativo en el volumen de la FVC respecto al placebo (MD: 98,2 ml más [77,6 más a 118,7 más]).

La confianza en este resultado es alta.

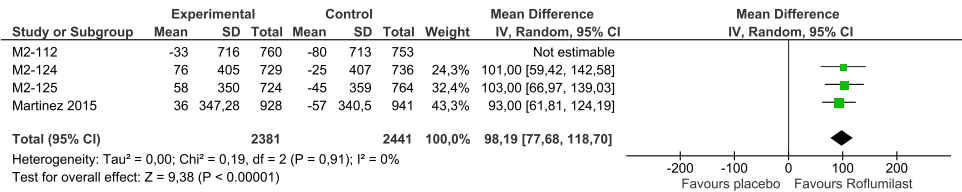

Figura 6. Resultados en relación con el cambio en la capacidad vital forzada (FVC) (ml).

EFFECTOS ADVERSOS EN PACIENTES CON EPOC

|            |                  |
|------------|------------------|
| Mortalidad | Calidad moderada |
|------------|------------------|

En el análisis conjunto de los datos (3 ECA, 119 eventos), la terapia con roflumilast no muestra diferencias en mortalidad comparada con un placebo (RR: 0,99 [0,70-1,42]).

La confianza en este resultado es moderada, por la imprecisión en el efecto global de la intervención.

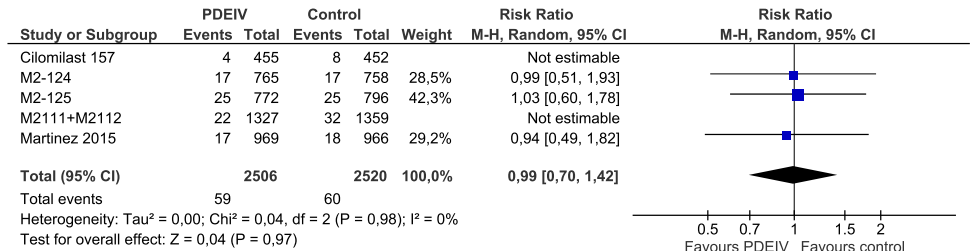

Figura 7. Resultados en relación con la mortalidad.

|                                   |                  |
|-----------------------------------|------------------|
| Eventos adversos (cualquier tipo) | Calidad moderada |
|-----------------------------------|------------------|

En el análisis conjunto de los datos (2 ECA, 3.223 eventos), la terapia con roflumilast muestra un aumento significativo de eventos adversos de cualquier tipo respecto a un placebo (RR: 1,11 [1,06-1,15]; 67 más por 1.000, de 37 más a 91 más; número de pacientes necesarios para perjudicar [NNH]: 16 [11-26]).

La confianza en este resultado es moderada. En este análisis se ha restringido solo a estudios en pacientes con bronquitis crónica; este efecto puede ser más amplio si se incluyen los estudios sin restricción de pacientes (ver eventos adversos específicos).

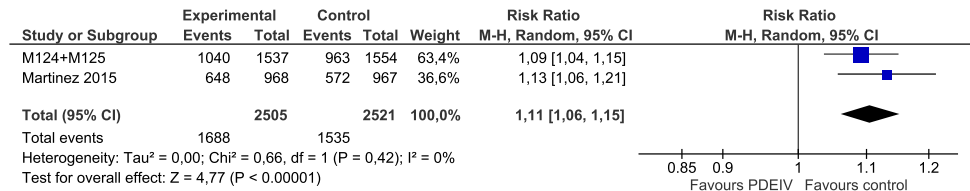

Figura 8. Resultados en relación con los eventos adversos (cualquier tipo).

|                                   |                  |
|-----------------------------------|------------------|
| Eventos adversos cardiovasculares | Calidad moderada |
|-----------------------------------|------------------|

En el análisis conjunto de los datos (2 ECA), la terapia con roflumilast no muestra diferencias en la frecuencia de eventos adversos cardiovasculares respecto a un placebo (RR: 0,92 [0,73-1,16]).

La confianza en este resultado es moderada, por la imprecisión del efecto global de la intervención; hay un escaso número de eventos.



Abandonos por eventos adversos (roflumilast 500 µg)

Calidad alta

En el análisis conjunto de los datos (8 ECA, 1.000 eventos), la terapia con roflumilast muestra un aumento significativo de abandonos debido a eventos adversos respecto a un placebo (RR: 1,61 [1,43-1,82]); 49 más por 1.000, de 35 más a 66 más; NNH: 20 [16-27]).

La confianza en este resultado es alta.

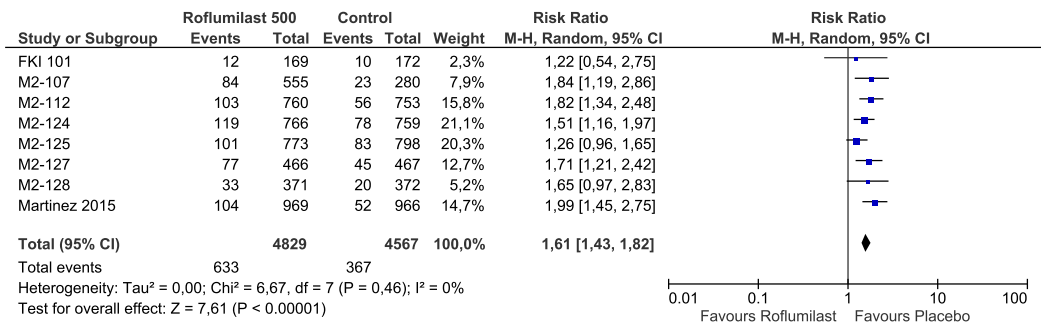

Figura 9. Resultados en relación con los abandonos por eventos adversos (roflumilast 500 µg).

Eventos adversos específicos (roflumilast 500 µg)

Calidad alta

En el análisis conjunto de los datos, la terapia con roflumilast presenta de forma significativa una mayor frecuencia de diarrea, náuseas y pérdida de peso respecto a un placebo (8 ECA):  
Diarrea (el 9,7 frente al 2,7%; RR: 3,96; IC del 95%, 3,20-4,89).  
Náuseas (el 4,8 frente al 1,4%; RR: 3,54; IC del 95%, 2,63-4,78).  
Pérdida de peso (el 8,4 frente al 2,3%; RR: 3,94; IC del 95%, 3,11-5,00).

La confianza en este resultado es alta.

En un análisis conjunto, en 12.054 pacientes con EPOC, los tratados con roflumilast, debido a su efecto antiinflamatorio sistémico, reportaron menor número de efectos adversos cardiovasculares (MACE) (HR: 0,65; IC del 95%, 0,45-0,93; p = 0,019)º.

Balance riesgo/beneficio

Calidad global moderada

En pacientes con bronquitis crónica y fenotipo agudizador, el tratamiento con roflumilast muestra una disminución de la frecuencia de exacerbaciones moderadas o graves, un aumento del tiempo hasta una exacerbación y una mejoría en la función pulmonar.  
Por otro lado, nuestros hallazgos sugieren que el roflumilast presenta un incremento de efectos adversos que causan abandonos del tratamiento respecto al placebo. No se han encontrado diferencias en la mortalidad, en la frecuencia de eventos adversos cardiovasculares o en la calidad de vida.  
La confianza global en esta evidencia es moderada.  
El grupo elaborador considera que los pacientes probablemente den más valor a la reducción de exacerbaciones que a los efectos adversos, que en su mayoría son leves y autolimitados.

Considerando el conjunto de pacientes con EPOC y bronquitis crónica, el balance entre los beneficios y los inconvenientes es incierto debido a la frecuencia de efectos adversos y a los abandonos del tratamiento. En el subgrupo de pacientes con mayor número de exacerbaciones o que precisaron ingreso hospitalario, se justifica su administración, pues los beneficios del tratamiento pueden compensar el riesgo de los efectos adversos. Los efectos adversos asociados no son graves y en su mayoría ceden a las 4 semanas

Recomendaciones

Débil a favor

Se sugiere el uso del roflumilast como fármaco de segunda línea para prevenir exacerbaciones, en pacientes fenotipo agudizador con bronquitis crónica y limitación grave al flujo aéreo.

**Especificaciones:** su perfil de seguridad puede hacer que la tolerancia al fármaco sea escasa. Se debe prestar atención a la posible aparición de efectos adversos.

Tabla 15.1. Resumen de conclusiones

|                       | Judgement                            |                                               |                                                          |                                          |                         |        |                               |
|-----------------------|--------------------------------------|-----------------------------------------------|----------------------------------------------------------|------------------------------------------|-------------------------|--------|-------------------------------|
| Desirable effects     | Trivial                              | Small                                         | Moderate                                                 | Large                                    |                         | Varies | Don't know                    |
| Undesirable effects   | Large                                | Moderate                                      | Small                                                    | Trivial                                  |                         | Varies | Don't know                    |
| Certainty of evidence | Very low                             | Low                                           | Moderate                                                 | High                                     |                         |        | No included studies           |
| Values                | Important uncertainty or variability | Possibly important uncertainty or variability | Probably no important uncertainty or variability         | No important uncertainty or variability  |                         |        | No known undesirable outcomes |
| Balance of effects    | Favors the comparison                | Probably favors the comparison                | Does not favor either the intervention or the comparison | <b>Probably favours the intervention</b> | Favors the intervention | Varies | Don't know                    |
| Resources required    | Large costs                          | Moderate costs                                | Negligible costs and savings                             | Moderate savings                         | Large savings           | Varies | Don't know                    |
| Acceptability         | No                                   | Probably no                                   | <b>Probably yes</b>                                      | Yes                                      |                         | Varies | Don't know                    |
| Feasibility           | No                                   | Probably no                                   | Probably yes                                             | <b>Yes</b>                               |                         | Varies | Don't know                    |

Tabla 15.2. Evaluación de la evidencia del uso de roflumilast en la prevención de las agudizaciones de la EPOC

| Quality assessment                      |                           |                |                |                             |                      |                      | N° of patients       |                      | Effect                                         |                                                                                                       | Quality               | Importance |
|-----------------------------------------|---------------------------|----------------|----------------|-----------------------------|----------------------|----------------------|----------------------|----------------------|------------------------------------------------|-------------------------------------------------------------------------------------------------------|-----------------------|------------|
| N° of studies                           | Study design              | Risk of bias   | Inconsistency  | Indirectness                | Imprecision          | Other considerations | PDEIVs               | Placebo              | Relative (95% CI)                              | Absolute (95% CI)                                                                                     |                       |            |
| Exacerbation rate                       |                           |                |                |                             |                      |                      |                      |                      |                                                |                                                                                                       |                       |            |
| 3                                       | ran-<br>domised<br>trials | not<br>serious | not<br>serious | not<br>serious              | serious <sup>1</sup> | none                 |                      |                      | Rate ratio<br><b>0.85</b><br>(0.78 to<br>0.92) | <b>0 fewer<br/>per 1<br/>patient(s)<br/>per years</b><br>(from 0<br>fewer to 0<br>fewer) <sup>5</sup> | ⊕⊕⊕○<br>MODE-<br>RATE | CRITICAL   |
| Patients with at least one exacerbation |                           |                |                |                             |                      |                      |                      |                      |                                                |                                                                                                       |                       |            |
| 3                                       | ran-<br>domised<br>trials | not<br>serious | not<br>serious | not<br>serious              | serious <sup>1</sup> | none                 | 537/2516<br>(21.3%)  | 636/2511<br>(25.3%)  | RR <b>0.85</b><br>(0.78 to<br>0.93)            | <b>38 fewer<br/>per 1000</b><br>(from 18<br>fewer to<br>56 fewer)                                     | ⊕⊕⊕○<br>MODE-<br>RATE | CRITICAL   |
| Time to first exacerbation HR           |                           |                |                |                             |                      |                      |                      |                      |                                                |                                                                                                       |                       |            |
| 3                                       | ran-<br>domised<br>trials | not<br>serious | not<br>serious | not<br>serious              | serious <sup>1</sup> | none                 |                      |                      | HR <b>0.90</b><br>(0.83 to<br>0.97)            | <b>1 fewer<br/>per 1000</b><br>(from 1<br>fewer to 1<br>fewer)                                        | ⊕⊕⊕○<br>MODE-<br>RATE | CRITICAL   |
| Mortality                               |                           |                |                |                             |                      |                      |                      |                      |                                                |                                                                                                       |                       |            |
| 3                                       | ran-<br>domised<br>trials | not<br>serious | not<br>serious | not<br>serious              | serious <sup>2</sup> | none                 | 59/2506<br>(2.4%)    | 60/2520<br>(2.4%)    | RR <b>0.99</b><br>(0.70 to<br>1.42)            | <b>0 fewer<br/>per 1000</b><br>(from 7<br>fewer to<br>10 more)                                        | ⊕⊕⊕○<br>MODE-<br>RATE | CRITICAL   |
| Adverse events (all)                    |                           |                |                |                             |                      |                      |                      |                      |                                                |                                                                                                       |                       |            |
| 2                                       | ran-<br>domised<br>trials | not<br>serious | not<br>serious | serious <sup>3</sup>        | not<br>serious       | none                 | 1688/2505<br>(67.4%) | 1535/2521<br>(60.9%) | RR <b>1.11</b><br>(1.06 to<br>1.15)            | <b>67 more<br/>per 1000</b><br>(from 37<br>more to 91<br>more)                                        | ⊕⊕⊕○<br>MODE-<br>RATE | CRITICAL   |
| Cardiovascular events                   |                           |                |                |                             |                      |                      |                      |                      |                                                |                                                                                                       |                       |            |
| 2                                       | ran-<br>domised<br>trials | not<br>serious | not<br>serious | not<br>serious <sup>4</sup> | serious <sup>2</sup> | none                 | 124/2506<br>(4.9%)   | 136/2520<br>(5.4%)   | RR <b>0.92</b><br>(0.73 to<br>1.16)            | <b>4 fewer<br/>per 1000</b><br>(from 9<br>more to 15<br>fewer)                                        | ⊕⊕⊕○<br>MODE-<br>RATE | CRITICAL   |

Tabla 15.2. Evaluación de la evidencia del uso de roflumilast en la prevención de las agudizaciones de la EPOC (cont.)

| Quality assessment                                         |                           |                |                |                |                |                      | N° of patients                                                                                                                                                                                            |                    | Effect                              |                                                                       | Quality        | Importance     |
|------------------------------------------------------------|---------------------------|----------------|----------------|----------------|----------------|----------------------|-----------------------------------------------------------------------------------------------------------------------------------------------------------------------------------------------------------|--------------------|-------------------------------------|-----------------------------------------------------------------------|----------------|----------------|
| N° of studies                                              | Study design              | Risk of bias   | Inconsistency  | Indirectness   | Imprecision    | Other considerations | PDEIVs                                                                                                                                                                                                    | Placebo            | Relative (95% CI)                   | Absolute (95% CI)                                                     |                |                |
| Withdrawals due to AE all trials roflumilast 500 micgr     |                           |                |                |                |                |                      |                                                                                                                                                                                                           |                    |                                     |                                                                       |                |                |
| 8                                                          | ran-<br>domised<br>trials | not<br>serious | not<br>serious | not<br>serious | not<br>serious | none                 | 633/4829<br>(13.1%)                                                                                                                                                                                       | 367/4567<br>(8.0%) | RR <b>1.61</b><br>(1.43 to<br>1.82) | <b>49 more<br/>per 1000</b><br>(from 35<br>more to<br>66 more)        | ⊕⊕⊕⊕<br>HIGH   | CRITICAL       |
| Specific adverse events - all trials roflumilast 500 micgr |                           |                |                |                |                |                      |                                                                                                                                                                                                           |                    |                                     |                                                                       |                |                |
| 8                                                          | ran-<br>domised<br>trials | not<br>serious | not<br>serious | not<br>serious | not<br>serious | none                 | diarrhoea (9.7% versus 2.7%; risk ratio 3.96, 95% CI 3.20 to 4.89), nausea (4.8% versus 1.4%; risk ratio 3.54, 95% CI 2.63 to 4.78), weight loss (8.4% versus 2.3%; risk ratio 3.94, 95% CI 3.11 to 5.00) |                    |                                     | ⊕⊕⊕⊕<br>HIGH                                                          | IMPOR-<br>TANT |                |
| Change in QoL (SGRQ)                                       |                           |                |                |                |                |                      |                                                                                                                                                                                                           |                    |                                     |                                                                       |                |                |
| 2                                                          | ran-<br>domised<br>trials | not<br>serious | not<br>serious | not<br>serious | not<br>serious | none                 | 1107                                                                                                                                                                                                      | 1122               | -                                   | MD <b>0.26<br/>points<br/>more</b><br>(1.18 fewer<br>to 1.69<br>more) | ⊕⊕⊕⊕<br>HIGH   | IMPOR-<br>TANT |
| Post-bronch FEV <sub>1</sub> change, mL                    |                           |                |                |                |                |                      |                                                                                                                                                                                                           |                    |                                     |                                                                       |                |                |
| 3                                                          | ran-<br>domised<br>trials | not<br>serious | not<br>serious | not<br>serious | not<br>serious | none                 | 2403                                                                                                                                                                                                      | 2452               | -                                   | MD <b>52 MI<br/>more</b><br>(40.49<br>more to<br>63.5 more)           | ⊕⊕⊕⊕<br>HIGH   | IMPOR-<br>TANT |
| FVC change, mL                                             |                           |                |                |                |                |                      |                                                                                                                                                                                                           |                    |                                     |                                                                       |                |                |
| 4                                                          | ran-<br>domised<br>trials | not<br>serious | not<br>serious | not<br>serious | not<br>serious | none                 | 2381                                                                                                                                                                                                      | 2441               | -                                   | MD <b>98.19<br/>mL more</b><br>(77.68<br>more<br>to 118.7<br>more)    | ⊕⊕⊕⊕<br>HIGH   | IMPOR-<br>TANT |

CI: Confidence interval; RR: Risk ratio; HR: Hazard Ratio; MD: Mean difference.

<sup>1</sup> Wide absolute effect confidence interval, from negligible effect to appreciable benefit.<sup>2</sup> Few number of events. 95% CI boundaries include benefit or harm.<sup>3</sup> Only include trials of longer duration in patients with chronic bronchitis. Broader scope might better estimate the safety profile of the drug.<sup>4</sup> No indirectness since included here only long term trials.

## Referencias

- Calverley PM, Rabe KF, Goehring UM, Kristiansen S, Fabbri LM, Martínez FJ, et al. Roflumilast in symptomatic chronic obstructive pulmonary disease: two randomised clinical trials. *Lancet*. 2009;374(9691):685-94.
- Martínez FJ, Calverley PMA, Goehring UM. Effect of roflumilast on exacerbations in patients with severe chronic obstructive pulmonary disease uncontrolled by combination therapy (REACT): a multicentre randomised controlled trial. *Lancet*. 2015;385:857-66.
- Calverley PM, Sánchez-Toril F, McIvor A, Teichmann P, Bredenbroeker D, Fabbri LM. Effect of 1-year treatment with roflumilast in severe chronic obstructive pulmonary disease. *Am J Respir Crit Care Med*. 2007;176:154-61.
- \*Rennard SI, Calverley PM, Goehring UM, Bredenbröcker D, Martínez FJ. Reduction of exacerbations by the PDE4 inhibitor roflumilast - the importance of defining different subsets of patients with COPD. *Respir Res*. 2011;12:18.
- Rabe KF, Bateman ED, O'Donnell D, Witte S, Bredenbröcker D, Bethke TD. Roflumilast - an oral antiinflammatory treatment for chronic obstructive pulmonary disease: a randomised controlled trial. *Lancet*. 2005;36:563-71.
- Bredenbrocker D, Syed J, Leichtl S, Rathgeb F, Wurst W. Safety of once-daily roflumilast, a new, orally active, selective phosphodiesterase 4 inhibitor, in patients with COPD. *Am J Resp Crit Care Med*. 2002;165 Suppl 8:A595.
- Fabbri LM, Calverley PM, Izquierdo-Alonso JL, Bundschuh DS, Brose M, Martínez FJ, et al. Roflumilast in moderate-to-severe chronic obstructive pulmonary disease treated with long acting bronchodilators: two randomised clinical trials. *Lancet*. 2009;374:695-703.
- GSK CTR-157. Estudio aleatorizado doble ciego, controlado, paralelo para estudiar la eficacia seguridad y tolerabilidad de cilomast (15 mg bd) como mantenimiento a pacientes con EPOC durante 12 meses. Disponible en: [www.gsk-clinicalstudyregister.com/files/pdf/24053.pdf](http://www.gsk-clinicalstudyregister.com/files/pdf/24053.pdf)
- White WB, Cooke GE, Kowey PR, Calverley PM, Bredenbröcker D, Goehring UM, et al. Cardiovascular safety in patients receiving roflumilast for the treatment of COPD. *Chest*. 2013;144:758-65.

\*Estudio *post hoc*, que incluye resultados del estudio M2-111, no publicado previamente.

# Tratamiento antibiótico de larga duración para prevenir exacerbaciones: las fluoroquinolonas y los macrólidos

## P16. Pregunta para responder:

En los pacientes con EPOC estable, ¿se recomienda el uso de antibióticos orales para prevenir las exacerbaciones?

### Fluoroquinolonas

Se identificó un estudio que cumplía con los criterios de inclusión. Es un estudio aleatorizado, controlado con placebo<sup>1</sup>. La población estudiada comprende 1.149 pacientes adultos con EPOC (volumen espiratorio forzado en el primer segundo [FEV<sub>1</sub>]/capacidad vital forzada [FVC] < 0,70), bronquitis crónica y al menos 2 exacerbaciones durante el año previo. El 21% tenía obstrucción moderada (prebroncodilatación, FEV<sub>1</sub> 50-80%); el 43,9%, obstrucción grave (prebroncodilatación, FEV<sub>1</sub> 30-49%), y el 26%, obstrucción muy grave (prebroncodilatación, FEV<sub>1</sub> < 30%). Los participantes fueron asignados de forma aleatoria a recibir moxifloxacino 400 mg o placebo 1 vez al día durante 5 días, repitiendo este ciclo cada 8 semanas, con un total de 6 ciclos administrados en 48 semanas.

## 1. FLUOROQUINOLONAS FRENTE A PLACEBO

|                                                                                 |                  |
|---------------------------------------------------------------------------------|------------------|
| Exacerbación de la EPOC: pacientes con al menos 1 exacerbación moderada o grave | Calidad moderada |
|---------------------------------------------------------------------------------|------------------|

En un análisis no ajustado con los resultados crudos del estudio, el tratamiento con fluoroquinolonas no muestra diferencias en el porcentaje de pacientes que presenta al menos 1 exacerbación moderada o grave respecto a los pacientes que reciben placebo (riesgo relativo [RR]: 0,93 [0,83-1,05]).

La publicación del estudio realiza un análisis de razón de ventajas ajustado (*odds ratio*) por grupos de pacientes con 1, 2, 3 o más exacerbaciones para, finalmente, presentar el estimador conjunto de estas 3 poblaciones. Este análisis se realiza en las poblaciones por protocolo (PP) y por intención de tratar (ITT) y para las 2 definiciones de exacerbación consideradas por el ensayo.

### Macrólidos

Se identificó una revisión sistemática (RS) relevante<sup>2</sup>, que recoge 7 estudios, de los cuales 3 tienen un seguimiento de por lo menos 12 meses y tratamiento antibiótico perteneciente a la familia de los macrólidos<sup>3-5</sup>. Posteriormente se identificó un estudio adicional<sup>6</sup>.

Los 4 estudios son aleatorizados, controlados con placebo, con un seguimiento de al menos 1 año. Un estudio incluyó pacientes con EPOC con antecedentes de por lo menos 3 exacerbaciones durante el año previo<sup>6</sup>. Otro estudio incluyó pacientes con al menos 1 exacerbación durante el año previo<sup>5</sup>, y 2 estudios, a pacientes con EPOC sin considerar los antecedentes de exacerbaciones durante el año previo<sup>3,4</sup>.

Los macrólidos, dosis y pautas evaluados fueron eritromicina, de 200 a 400 mg al día, eritromicina, 250 mg 2 veces al día, azitromicina, 250 mg al día, y azitromicina, 500 mg 3 veces a la semana.

Los resultados en la población ITT solo muestran un efecto significativo en la definición secundaria. En esta población, el estimador central del efecto muestra unas reducciones relativas de entre el 19% (definición primaria) y el 23% (definición secundaria), aunque el extremo superior del intervalo de confianza (IC) no excluye un efecto clínicamente irrelevante.

En el subgrupo de pacientes con esputo mucopurulento, no se obtuvieron diferencias significativas para la población ITT, aunque sí en la población PP.

La confianza en este resultado es moderada debido a la imprecisión de los resultados.

|                                      |              |
|--------------------------------------|--------------|
| Tiempo hasta la primera exacerbación | Calidad alta |
|--------------------------------------|--------------|

El estudio aporta datos crudos sobre el tiempo hasta la exacerbación en cada uno de sus brazos. El tiempo transcurrido antes de la primera exacerbación tiende a ser mayor con el tratamiento con fluoroquinolonas que con un placebo, sin llegar a ser una diferencia significativa, tanto en el análisis por intención de tratar como en el

análisis por protocolo. La confianza en este resultado es alta; aunque no se dispone de los resultados numéricos, el tamaño de la muestra fue suficientemente grande como para proporcionar una respuesta precisa.

|                                               |              |
|-----------------------------------------------|--------------|
| Calidad de vida: puntuación en la escala SGRQ | Calidad alta |
|-----------------------------------------------|--------------|

El Saint George's Respiratory Questionnaire (SGRQ) arroja puntuaciones entre 0 y 100; puntuaciones más altas indican peor calidad de vida.

En el estudio, el tratamiento con fluoroquinolonas no muestra diferencias en la puntuación final de la escala de calidad de vida respecto al placebo (MD: 1,2 puntos menos [de 3,01 menos a 0,61 más]).

La confianza en este resultado es alta.

| Hospitalizaciones | Calidad moderada |
|-------------------|------------------|
|-------------------|------------------|

En el estudio, el tratamiento con fluoroquinolonas no muestra diferencias significativas en el porcentaje de pacientes que requieren hospitalización respecto al placebo (RR: 0,98 [0,8-1,21]).

La confianza en este resultado es moderada, por la imprecisión en el efecto de la intervención.

## EFFECTOS ADVERSOS

| Mortalidad | Calidad moderada |
|------------|------------------|
|------------|------------------|

En el estudio, el tratamiento con fluoroquinolonas no muestra diferencias en la mortalidad respecto al placebo (RR: 0,901 [0,45-1,78]).

La confianza en este resultado es moderada, por la imprecisión en el efecto de la intervención.

| Número de pacientes con cualquier efecto adverso | Calidad moderada |
|--------------------------------------------------|------------------|
|--------------------------------------------------|------------------|

En el estudio, el tratamiento con fluoroquinolonas no muestra diferencias significativas en la frecuencia global de eventos adversos respecto al placebo (RR: 0,97 [0,92-1,02]).

La confianza en los resultados es moderada; el estimador muestra el efecto sobre cualquier efecto adverso, relacionado o no con el tratamiento.

| Número de pacientes con efectos adversos relacionados con el tratamiento* | Calidad alta |
|---------------------------------------------------------------------------|--------------|
|---------------------------------------------------------------------------|--------------|

El número de pacientes con efectos adversos relacionados con el tratamiento fue significativamente superior en los pacientes tratados con fluoroquinolonas (RR: 2,46 [1,51-3,98]). Los efectos adversos más

comunes relacionados con el tratamiento antibiótico fueron los de tipo gastrointestinal (náuseas, vómitos y diarreas). La confianza en estos resultados es alta.

| Número de pacientes con efectos adversos graves relacionados con el tratamiento | Calidad moderada |
|---------------------------------------------------------------------------------|------------------|
|---------------------------------------------------------------------------------|------------------|

El estudio no muestra diferencias entre los 2 grupos en el número de pacientes con efectos adversos graves relacionados con el tratamiento, aunque el número de eventos es muy escaso (9/569 pacientes tratados con fluoroquinolonas frente a 3/580 pacientes con placebo) (RR: 3,06 [0,83-11,24]).

La confianza en estos resultados es moderada, por el escaso número de eventos.

| Balance riesgo/beneficio | Calidad global moderada |
|--------------------------|-------------------------|
|--------------------------|-------------------------|

La administración a largo plazo de fluoroquinolonas con finalidad preventiva en pacientes con EPOC estable no ha demostrado disminuir la frecuencia de exacerbaciones, prolongar el tiempo transcurrido hasta la siguiente exacerbación ni influir en la frecuencia de hospitalizaciones o en la calidad de vida en comparación con un placebo.

Tampoco se encuentran diferencias en la frecuencia global de eventos adversos o mortalidad respecto a un placebo. Además, el tratamiento a largo plazo con fluoroquinolonas se asoció a un incremento de los efectos indeseados relacionados con el tratamiento (principalmente de tipo digestivo) en comparación con un placebo.

\* Este apartado y el siguiente han sido analizados y calculados en Revman y GRADE Development Tool (GDT), y son adicionales al análisis originalmente presentado.

El principal motivo que limitó la confianza en algunos resultados fue la imprecisión en los estimadores del efecto de la intervención debido al escaso número de eventos.

Respecto a la generación de resistencias, se ha descrito en nuestro medio un aumento en el número de bacterias resistentes a las quinolonas. Este hecho se relaciona con la presión selectiva, por el amplio uso de este antibiótico.

La importancia de ser cuidadosos en la prescripción de fluoroquinolonas en el contexto de pacientes con EPOC radica en que actualmente se consideran como una de las opciones terapéuticas orales potencialmente más eficaces en el tratamiento de las agudizaciones de la EPOC grave o muy grave.

El estudio evaluó la aparición de resistencias durante su curso con la evaluación de las CMI (concentraciones mínimas inhibitorias) de los microorganismos patógenos aislados. Aunque no se detectó un aumento de las resistencias de forma global, solo se aislaron patóge-

nos en un 24% de la población del estudio y los resultados se presentan además separados por tipo de microorganismo patógeno.

Los inconvenientes asociados al tratamiento a largo plazo con fluoroquinolonas en pacientes con EPOC estable superan los potenciales beneficios.

|                 |                  |
|-----------------|------------------|
| Recomendaciones | Fuerte en contra |
|-----------------|------------------|

En pacientes con EPOC en fase estable, no se recomienda administrar tratamiento crónico con fluoroquinolonas con el propósito de prevenir exacerbaciones.

**Especificaciones:** el grupo elaborador de la guía está de acuerdo en racionalizar el uso de estos agentes y no indicarlo como pauta preventiva de exacerbaciones debido al riesgo de desarrollo de resistencias bacterianas.

Tabla 16.1. Resumen de conclusiones

|                       | Judgement                            |                                               |                                                          |                                         |                         |        |                               |
|-----------------------|--------------------------------------|-----------------------------------------------|----------------------------------------------------------|-----------------------------------------|-------------------------|--------|-------------------------------|
| Desirable effects     | Trivial                              | Small                                         | Moderate                                                 | Large                                   |                         | Varies | Don't know                    |
| Undesirable effects   | Large                                | Moderate                                      | Small                                                    | Trivial                                 |                         | Varies | Don't know                    |
| Certainty of evidence | Very low                             | Low                                           | Moderate                                                 | High                                    |                         |        | No included studies           |
| Values                | Important uncertainty or variability | Possibly important uncertainty or variability | Probably no important uncertainty or variability         | No important uncertainty or variability |                         |        | No known undesirable outcomes |
| Balance of effects    | Favors the comparison                | Probably favors the comparison                | Does not favor either the intervention or the comparison | Probably favors the intervention        | Favors the intervention | Varies | Don't know                    |
| Resources required    | Large costs                          | Moderate costs                                | Negligible costs and savings                             | Moderate savings                        | Large savings           | Varies | Don't know                    |
| Acceptability         | No                                   | Probably no                                   | Probably yes                                             | Yes                                     |                         | Varies | Don't know                    |
| Feasibility           | No                                   | Probably no                                   | Probably yes                                             | Yes                                     |                         | Varies | Don't know                    |

Tabla 16.2. Resumen de la evidencia en el uso de fluoroquinolonas en la prevención de las agudizaciones de la EPOC

| Quality assessment                                                                       |                   |              |               |              |                      |                      | No of patients             |                              | Effect                                       |                                                          | Quality       | Importance |
|------------------------------------------------------------------------------------------|-------------------|--------------|---------------|--------------|----------------------|----------------------|----------------------------|------------------------------|----------------------------------------------|----------------------------------------------------------|---------------|------------|
| No of studies                                                                            | Design            | Risk of bias | Inconsistency | Indirectness | Imprecision          | Other considerations | Fluroquinolones            | Placebo                      | Relative (95% CI)                            | Absolute (95% CI)                                        |               |            |
| COPD exacerbations (proportion of patients with at least 1 moderate/severe exacerbation) |                   |              |               |              |                      |                      |                            |                              |                                              |                                                          |               |            |
| 1                                                                                        | randomised trials | none         | none          | none         | serious <sup>1</sup> | none                 | 269/569 (47.3%)            | 295/580 (50.9%)              | Risk ratio 0.93 (0.83 to 1.05)               | 36 fewer per 1000 (from 25 more to 86 fewer)             | ⊕⊕⊕○ MODERATE | CRITICAL   |
| Time to first COPD exacerbation (days)                                                   |                   |              |               |              |                      |                      |                            |                              |                                              |                                                          |               |            |
| 1                                                                                        | randomised trials | none         | none          | none         | none                 | none                 | 569 <sup>2</sup>           | 580 <sup>2</sup>             | Not estimable <sup>3</sup>                   | Not estimable <sup>3</sup>                               | ⊕⊕⊕⊕ HIGH     | CRITICAL   |
| Hospitalisation (%)                                                                      |                   |              |               |              |                      |                      |                            |                              |                                              |                                                          |               |            |
| 1                                                                                        | randomised trials | none         | none          | none         | serious <sup>4</sup> | none                 | 131/569 <sup>5</sup> (23%) | 136/580 <sup>5</sup> (23.4%) | Risk ratio 0.98 (0.8 to 1.21) <sup>5</sup>   | 5 fewer per 1000 (from 47 fewer to 49 more) <sup>5</sup> | ⊕⊕⊕○ MODERATE | CRITICAL   |
| Mortality (%)                                                                            |                   |              |               |              |                      |                      |                            |                              |                                              |                                                          |               |            |
| 1                                                                                        | randomised trials | none         | none          | none         | serious <sup>4</sup> | none                 | 15/569 <sup>6</sup> (2.6%) | 17/580 <sup>6</sup> (2.9%)   | Risk ratio 0.901 (0.45 to 1.78) <sup>6</sup> | 3 fewer per 1000 (from 16 fewer to 23 more) <sup>6</sup> | ⊕⊕⊕○ MODERATE | CRITICAL   |



Tabla 16.2. Resumen de la evidencia en el uso de fluoroquinolonas en la prevención de las agudizaciones de la EPOC (cont.)

| Quality assessment                                                                                                     |                   |              |               |                      |             |                      | No of patients   |                  | Effect                          |                                                                    | Quality       | Importance |
|------------------------------------------------------------------------------------------------------------------------|-------------------|--------------|---------------|----------------------|-------------|----------------------|------------------|------------------|---------------------------------|--------------------------------------------------------------------|---------------|------------|
| No of studies                                                                                                          | Design            | Risk of bias | Inconsistency | Indirectness         | Imprecision | Other considerations | Fluoroquinolones | Placebo          | Relative (95% CI)               | Absolute (95% CI)                                                  |               |            |
| Any adverse events (%)                                                                                                 |                   |              |               |                      |             |                      |                  |                  |                                 |                                                                    |               |            |
| 1                                                                                                                      | randomised trials | none         | none          | serious <sup>8</sup> | none        | none                 | 467/569 (82.1%)  | 493/580 (85.0%)  | Risk ratio 0.97 (0.92 to 1.02)  | 26 fewer per 1000 (from 68 fewer to 17 more)                       | ⊕⊕⊕○ MODERATE | IMPOR-TANT |
| Drug related adverse events (%) <sup>*</sup>                                                                           |                   |              |               |                      |             |                      |                  |                  |                                 |                                                                    |               |            |
| 1                                                                                                                      | randomised trials | none         | none          | none                 | none        | none                 | 53/569           | 22/580           | Risk ratio 2.46 (1.51 to 3.98)  | 55 more per 1000 (from 19 more to 113 more)                        | ⊕⊕⊕⊕ HIGH     | CRITICAL   |
| Drug-related serious adverse events (%)                                                                                |                   |              |               |                      |             |                      |                  |                  |                                 |                                                                    |               |            |
| 1                                                                                                                      | randomised trials | none         | none          | none                 | none        | none                 | 9/569            | 3/580            | Risk ratio 3.06 (0.83 to 11.24) | 11 more per 1000 (from 1 fewer to 53 more)                         | ⊕⊕⊕⊕ HIGH     | CRITICAL   |
| Change in quality of life (Assessed via the St. George's Respiratory Questionnaire) (Better indicated by lower values) |                   |              |               |                      |             |                      |                  |                  |                                 |                                                                    |               |            |
| 1                                                                                                                      | randomised trials | none         | none          | none                 | none        | none                 | 503 <sup>7</sup> | 526 <sup>7</sup> | -                               | Mean difference 1.2 lower (3.01 lower to 0.61 higher) <sup>7</sup> | ⊕⊕⊕⊕ HIGH     | IMPOR-TANT |
| Reduction in airway bacterial load                                                                                     |                   |              |               |                      |             |                      |                  |                  |                                 |                                                                    |               |            |
| 0                                                                                                                      | -                 | -            | -             | -                    | -           | -                    | -                | -                | -                               | -                                                                  | -             | IMPOR-TANT |

<sup>1</sup>Estimates of effect are much influenced by type of analysis, PP or ITT population and outcome definition. 95% ICs do not exclude negligible effect in most situations.  
<sup>2</sup>For the intention-to-treat analysis: fluoroquinolone (n = 569), placebo (n = 580). For the per-protocol analysis: fluoroquinolone (n = 351), placebo (n = 387).  
<sup>3</sup>The trial did not provide estimates of the time to exacerbation in each arm in days; however, it reported a trend toward a longer duration to first exacerbation among patients who received fluoroquinolones than placebo according to both intention-to-treat and per-protocol analyses.  
<sup>4</sup>Wide confidence intervals: The ends of the confidence intervals lead to different clinical decisions.  
<sup>5</sup>Derived by intention-to-treat analysis. Per-protocol analysis found 56/351 (16.0%) versus 54/387 (14.0%), Risk ratio 1.14 (95% CI 0.81 to 1.61).  
<sup>6</sup>Derived by intention-to-treat analysis. Per-protocol analysis found 1/351 (0.3%) versus 3/387 (0.8%), Risk ratio 0.36 (95% CI 0.04 to 3.43).  
<sup>7</sup>Derived by intention-to-treat analysis. Per-protocol analysis found fluoroquinolone (n = 569), placebo (n = 580), mean difference -1.30 (95% CI -3.47 to 0.87).  
<sup>8</sup>Is a broad definition, the adverse events might not be specifically related to the intervention.

\* Esta fila y la siguiente han sido analizadas y calculadas en Revman y GDT, y son adicionales al análisis originalmente presentado.

2. MACRÓLIDOS FRENTE A PLACEBO

|                                                       |                  |
|-------------------------------------------------------|------------------|
| Exacerbación de la EPOC: tasa anual de exacerbaciones | Calidad moderada |
|-------------------------------------------------------|------------------|

En el análisis conjunto de los datos, el tratamiento con macrólidos reduce de forma significativa la tasa anualizada de exacerbaciones en un 24% en comparación con un placebo (coeficiente de tasas: 0,76 [0,68-0,86]; 3 estudios clínicos aleatorizados [ECA]).

Las diferencias absolutas, expresadas por la reducción media del número de exacerbaciones por paciente y por año, fueron de 0,40 menos (0,24 menos a 0,55 menos) para un total de 2 ECA.

La confianza en este resultado es moderada, por la heterogeneidad entre los estudios.

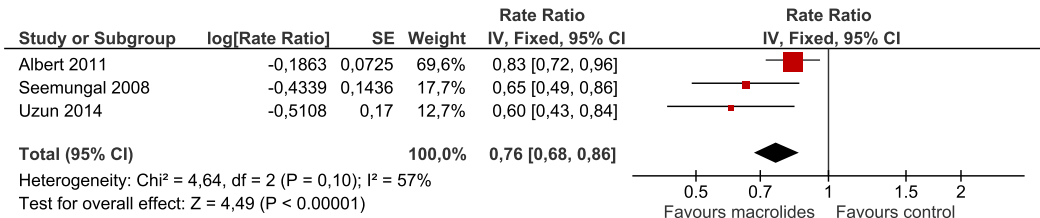

Figura 1. Resultados en relación con la tasa anual de exacerbaciones.

|                                                                                                                                                                                                                                                                                                                                                                                                                                                                                                                                                                                                                                                                                                                     |                                                                                                                                                                                                                                                                                                                                                                                                                                                                                                                              |
|---------------------------------------------------------------------------------------------------------------------------------------------------------------------------------------------------------------------------------------------------------------------------------------------------------------------------------------------------------------------------------------------------------------------------------------------------------------------------------------------------------------------------------------------------------------------------------------------------------------------------------------------------------------------------------------------------------------------|------------------------------------------------------------------------------------------------------------------------------------------------------------------------------------------------------------------------------------------------------------------------------------------------------------------------------------------------------------------------------------------------------------------------------------------------------------------------------------------------------------------------------|
| <b>Tiempo hasta la primera exacerbación</b>                                                                                                                                                                                                                                                                                                                                                                                                                                                                                                                                                                                                                                                                         | <b>Calidad alta</b>                                                                                                                                                                                                                                                                                                                                                                                                                                                                                                          |
| <p>En el análisis conjunto de los datos (3 ECA), el tratamiento con macrólidos aumenta significativamente el tiempo (días) hasta la primera exacerbación respecto al placebo (81,5 más, de 53,3 más a 109,8 más).</p>                                                                                                                                                                                                                                                                                                                                                                                                                                                                                               | <p>La confianza en este resultado es alta.</p>                                                                                                                                                                                                                                                                                                                                                                                                                                                                               |
| <b>Calidad de vida: puntuación total en la escala SGRQ</b>                                                                                                                                                                                                                                                                                                                                                                                                                                                                                                                                                                                                                                                          | <b>Calidad moderada</b>                                                                                                                                                                                                                                                                                                                                                                                                                                                                                                      |
| <p>El Saint George's Respiratory Questionnaire (SGRQ) arroja puntuaciones entre 0 y 100; puntuaciones más altas indican peor calidad de vida.</p> <p>En el análisis conjunto de los datos (2 ECA), el tratamiento con macrólidos muestra una mejoría significativa en la puntuación total de la</p>                                                                                                                                                                                                                                                                                                                                                                                                                 | <p>escala de calidad de vida SGRQ respecto al placebo (2,18 puntos menos, de 1,53 menos a 2,82 menos).</p> <p>La confianza en este resultado es moderada, por limitaciones en la ejecución de los estudios (las pérdidas fueron relevantes y no se midió este resultado en todos los pacientes).</p>                                                                                                                                                                                                                         |
| <b>Calidad de vida: puntuación en la escala SGRQ - síntomas</b>                                                                                                                                                                                                                                                                                                                                                                                                                                                                                                                                                                                                                                                     | <b>Calidad moderada</b>                                                                                                                                                                                                                                                                                                                                                                                                                                                                                                      |
| <p>El Saint George's Respiratory Questionnaire (SGRQ) arroja puntuaciones entre 0 y 100; puntuaciones más altas indican más síntomas.</p> <p>En el análisis conjunto de los datos (2 ECA), el tratamiento con macrólidos muestra una mejoría significativa de los síntomas, según la</p>                                                                                                                                                                                                                                                                                                                                                                                                                            | <p>escala de calidad de vida SGRQ, respecto al placebo (3,36 puntos menos, de 2,42 menos a 4,29 menos).</p> <p>La confianza en este resultado es moderada, por limitaciones en la ejecución de los estudios (las pérdidas fueron relevantes y no se midió este resultado en todos los pacientes).</p>                                                                                                                                                                                                                        |
| <b>Calidad de vida: puntuación en la escala SGRQ - actividad</b>                                                                                                                                                                                                                                                                                                                                                                                                                                                                                                                                                                                                                                                    | <b>Calidad moderada</b>                                                                                                                                                                                                                                                                                                                                                                                                                                                                                                      |
| <p>El Saint George's Respiratory Questionnaire (SGRQ) arroja puntuaciones entre 0 y 100; puntuaciones más altas indican menor actividad.</p> <p>En el análisis conjunto de los datos (2 ECA), el tratamiento con macrólidos muestra una mejoría significativa en la actividad, según la</p>                                                                                                                                                                                                                                                                                                                                                                                                                         | <p>escala de calidad de vida SGRQ, respecto al placebo (1,82 puntos menos, de 1,31 menos a 2,62 menos).</p> <p>La confianza en este resultado es moderada, por limitaciones en la ejecución de los estudios (las pérdidas fueron relevantes y no se midió este resultado en todos los pacientes).</p>                                                                                                                                                                                                                        |
| <b>Calidad de vida: Puntuación en la escala SGRQ - impacto</b>                                                                                                                                                                                                                                                                                                                                                                                                                                                                                                                                                                                                                                                      | <b>Calidad baja</b>                                                                                                                                                                                                                                                                                                                                                                                                                                                                                                          |
| <p>El Saint George's Respiratory Questionnaire (SGRQ) arroja puntuaciones entre 0 y 100; puntuaciones más altas indican mayor impacto.</p> <p>En el análisis conjunto de los datos (2 ECA), el tratamiento con macrólidos muestra una mejoría significativa en el área impacto del cuestionario SGRQ respecto al placebo (2,04 puntos menos, de 1,28 menos a 2,81 menos).</p>                                                                                                                                                                                                                                                                                                                                       | <p>La confianza en este resultado es baja, por limitaciones en la ejecución de los estudios (las pérdidas fueron relevantes y no se midió este resultado en todos los pacientes) y por la variabilidad de los resultados entre los estudios.</p>                                                                                                                                                                                                                                                                             |
| <b>Hospitalizaciones</b>                                                                                                                                                                                                                                                                                                                                                                                                                                                                                                                                                                                                                                                                                            | <b>Calidad moderada</b>                                                                                                                                                                                                                                                                                                                                                                                                                                                                                                      |
| <p>Los datos no pudieron analizarse conjuntamente, por la variabilidad en la forma de proporcionar los resultados.</p> <p>Seemungal et al (2008)<sup>4</sup> describen en el tratamiento con macrólidos una disminución no significativa en la proporción de exacerbaciones graves que requieren hospitalización frente al placebo (el 7,4 frente al 11,4%, respectivamente; RR: 0,66; IC del 95%, 0,27-1,65).</p> <p>Albert et al (2010) describen en el tratamiento con macrólidos una reducción no significativa en la tasa de hospitalizaciones debidas a la EPOC frente al placebo (0,34 frente a 0,49 hospitalizaciones/paciente/año, respectivamente; <i>hazard ratio</i>: 0,82; IC del 95%, 0,64-1,07).</p> | <p>Uzun et al (2014)<sup>6</sup> describen en el tratamiento con macrólidos un incremento no significativo en el tiempo hasta la primera hospitalización frente al placebo (282 frente a 258 días, respectivamente; <i>p</i> = 0,48) y un aumento no significativo en el número de exacerbaciones graves que requieren hospitalización (el 29,8 frente al 24%, respectivamente; RR: 1,24; IC del 95%, 0,79-1,94).</p> <p>La confianza en este resultado es moderada, por la imprecisión en el efecto de la intervención.</p> |

## EFECTOS ADVERSOS

| Generación de resistencias                                                                                                                                                                                                                                                                                                                                                                                                                                                                                                                                                                                                                                                                                                                                                                                                                                                                                                                                                                                                                                                                                                                                                                                                          | Calidad moderada                                                                                                                                                                                                                                                                                                                                                                                                                                                                                                                                                                                                                                                                                                                                                                                                                                                                                                                                                                                                                                                                                                                                                            |
|-------------------------------------------------------------------------------------------------------------------------------------------------------------------------------------------------------------------------------------------------------------------------------------------------------------------------------------------------------------------------------------------------------------------------------------------------------------------------------------------------------------------------------------------------------------------------------------------------------------------------------------------------------------------------------------------------------------------------------------------------------------------------------------------------------------------------------------------------------------------------------------------------------------------------------------------------------------------------------------------------------------------------------------------------------------------------------------------------------------------------------------------------------------------------------------------------------------------------------------|-----------------------------------------------------------------------------------------------------------------------------------------------------------------------------------------------------------------------------------------------------------------------------------------------------------------------------------------------------------------------------------------------------------------------------------------------------------------------------------------------------------------------------------------------------------------------------------------------------------------------------------------------------------------------------------------------------------------------------------------------------------------------------------------------------------------------------------------------------------------------------------------------------------------------------------------------------------------------------------------------------------------------------------------------------------------------------------------------------------------------------------------------------------------------------|
| <p>Los datos no pudieron analizarse conjuntamente porque uno de los estudios no reporta datos crudos.</p> <p>Albert et al (2011)<sup>5</sup> describen el desarrollo de microorganismos resistentes en los cultivos de los pacientes colonizados durante el seguimiento del estudio. Las diferencias respecto al porcentaje de resistencias son significativas entre los pacientes que recibieron macrólidos y los que recibieron un placebo (el 81 frente al 41%). El porcentaje de pacientes incluidos en este análisis es escaso y los resultados presen-</p>                                                                                                                                                                                                                                                                                                                                                                                                                                                                                                                                                                                                                                                                    | <p>tan dudas sobre la unidad de análisis (número de pacientes, muestras o microorganismos analizados).</p> <p>Uzun et al (2014)<sup>6</sup> describen el desarrollo de microorganismos resistentes en menor proporción en los pacientes que recibieron macrólidos respecto a los que recibieron un placebo (3/51 [6%] frente a 11/57 [24%]; RR: 0,57; IC del 95%, 0,15-2,26).</p> <p>La confianza en este resultado es moderada, por la imprecisión en el efecto de la intervención.</p>                                                                                                                                                                                                                                                                                                                                                                                                                                                                                                                                                                                                                                                                                    |
| Efectos adversos graves                                                                                                                                                                                                                                                                                                                                                                                                                                                                                                                                                                                                                                                                                                                                                                                                                                                                                                                                                                                                                                                                                                                                                                                                             | Calidad moderada                                                                                                                                                                                                                                                                                                                                                                                                                                                                                                                                                                                                                                                                                                                                                                                                                                                                                                                                                                                                                                                                                                                                                            |
| <p>En el análisis conjunto de los datos (3 ECA), el tratamiento con macrólidos no muestra diferencias en el porcentaje de pacientes con efectos adversos graves al compararlo con un placebo (RR: 0,86 [0,74-1,01]).</p> <p>Un estudio que realizó audiometrías durante el seguimiento mostró reducciones en la sensibilidad auditiva en el 25% de los tratados</p>                                                                                                                                                                                                                                                                                                                                                                                                                                                                                                                                                                                                                                                                                                                                                                                                                                                                 | <p>con azitromicina y en el 20% de los tratados con placebo (Albert et al [2011]).</p> <p>La confianza en este resultado es moderada, por la imprecisión de los resultados.</p>                                                                                                                                                                                                                                                                                                                                                                                                                                                                                                                                                                                                                                                                                                                                                                                                                                                                                                                                                                                             |
| Mortalidad                                                                                                                                                                                                                                                                                                                                                                                                                                                                                                                                                                                                                                                                                                                                                                                                                                                                                                                                                                                                                                                                                                                                                                                                                          | Calidad moderada                                                                                                                                                                                                                                                                                                                                                                                                                                                                                                                                                                                                                                                                                                                                                                                                                                                                                                                                                                                                                                                                                                                                                            |
| <p>En el análisis conjunto de los datos (3 ECA), el tratamiento con macrólidos no muestra diferencias en la mortalidad al compararlo con un placebo (RR: 0,90 [0,48-1,69]), aunque el número de eventos es escaso (38).</p>                                                                                                                                                                                                                                                                                                                                                                                                                                                                                                                                                                                                                                                                                                                                                                                                                                                                                                                                                                                                         | <p>La confianza en este resultado es moderada, por la imprecisión en el efecto de la intervención.</p>                                                                                                                                                                                                                                                                                                                                                                                                                                                                                                                                                                                                                                                                                                                                                                                                                                                                                                                                                                                                                                                                      |
| Resumen de resultados                                                                                                                                                                                                                                                                                                                                                                                                                                                                                                                                                                                                                                                                                                                                                                                                                                                                                                                                                                                                                                                                                                                                                                                                               | Calidad global moderada                                                                                                                                                                                                                                                                                                                                                                                                                                                                                                                                                                                                                                                                                                                                                                                                                                                                                                                                                                                                                                                                                                                                                     |
| <p>La administración a largo plazo de macrólidos con finalidad preventiva en pacientes con EPOC de moderada a grave estable disminuye de forma significativa la tasa anual de exacerbaciones por paciente, aumenta el tiempo transcurrido antes de una exacerbación y mejora la calidad de vida respecto a un placebo. Se ha descrito ampliamente que los macrólidos, además del efecto bacteriostático, cumplen una acción antiinflamatoria e inmunomoduladora, hecho que podría explicar el mecanismo de acción subyacente en su efecto clínico.</p> <p>Los resultados en la generación de resistencias en los estudios son poco concluyentes, aunque los ensayos clínicos no son el diseño idóneo para evaluar este efecto. De todos modos, el incremento de las resistencias a los antibióticos se ha relacionado ampliamente con su uso.</p> <p>No se han encontrado diferencias en la frecuencia de eventos adversos graves, mortalidad u hospitalizaciones, aunque el número de casos evaluados fue escaso. Un estudio mostró una reducción de la sensibilidad auditiva en los pacientes tratados con macrólidos. Otro efecto grave anteriormente descrito con el uso de macrólidos es la prolongación del intervalo QT.</p> | <p>No se han identificado estudios de costes, pero esta intervención se podría traducir en un ahorro de costes significativo para el sistema sanitario, por los ingresos que se podrían evitar.</p> <p>Aunque no se han identificado estudios relacionados con los valores y preferencias de los pacientes, el grupo elaborador considera que los pacientes podrían dar más valor a una reducción en las exacerbaciones que al riesgo potencial de efectos adversos asociados al tratamiento.</p> <p>Los beneficios potenciales del tratamiento a largo plazo con macrólidos en pacientes con EPOC estable y con exacerbaciones frecuentes podrían superar a los inconvenientes. El riesgo potencial de generar resistencias y los potenciales efectos adversos propios del tratamiento son los factores que deben considerarse como las limitaciones potenciales en su prescripción.</p> <p>Todavía se mantiene la incertidumbre sobre la población específica de pacientes que probablemente se beneficiaría más del tratamiento con macrólidos a largo plazo, la dosis óptima y la duración del tratamiento.</p> <p>La confianza global en la evidencia es moderada.</p> |
| Recomendaciones                                                                                                                                                                                                                                                                                                                                                                                                                                                                                                                                                                                                                                                                                                                                                                                                                                                                                                                                                                                                                                                                                                                                                                                                                     | Débil a favor                                                                                                                                                                                                                                                                                                                                                                                                                                                                                                                                                                                                                                                                                                                                                                                                                                                                                                                                                                                                                                                                                                                                                               |
| <p>En pacientes con EPOC con fenotipo agudizador, con al menos 3 agudizaciones el año previo a pesar del tratamiento adecuado, se sugiere el tratamiento con macrólidos a largo plazo.</p> <p><b>Especificaciones:</b> el grupo elaborador cree que se debe restringir esta indicación a pacientes con frecuentes agudizaciones y grado de</p>                                                                                                                                                                                                                                                                                                                                                                                                                                                                                                                                                                                                                                                                                                                                                                                                                                                                                      | <p>obstrucción grave. Una vez seleccionados los pacientes, se debe realizar un control estricto ante los posibles efectos adversos asociados al tratamiento, como la prolongación del intervalo QT, la pérdida de la capacidad auditiva o la generación de resistencias.</p>                                                                                                                                                                                                                                                                                                                                                                                                                                                                                                                                                                                                                                                                                                                                                                                                                                                                                                |

Tabla 16.3. Resumen de conclusiones

|                       | Judgement                            |                                               |                                                          |                                         |                         |        |                               |
|-----------------------|--------------------------------------|-----------------------------------------------|----------------------------------------------------------|-----------------------------------------|-------------------------|--------|-------------------------------|
| Desirable effects     | Trivial                              | Small                                         | <b>Moderate</b>                                          | Large                                   |                         | Varies | Don't know                    |
| Undesirable effects   | Large                                | <b>Moderate</b>                               | Small                                                    | Trivial                                 |                         | Varies | Don't know                    |
| Certainty of evidence | Very low                             | Low                                           | <b>Moderate</b>                                          | High                                    |                         |        | No included studies           |
| Values                | Important uncertainty or variability | Possibly important uncertainty or variability | Probably no important uncertainty or variability         | No important uncertainty or variability |                         |        | No known undesirable outcomes |
| Balance of effects    | Favors the comparison                | Probably favors the comparison                | Does not favor either the intervention or the comparison | <b>Probably favors the intervention</b> | Favors the intervention | Varies | Don't know                    |
| Resources required    | Large costs                          | Moderate costs                                | Negligible costs and savings                             | Moderate savings                        | Large savings           | Varies | Don't know                    |
| Acceptability         | No                                   | Probably no                                   | Probably yes                                             | Yes                                     |                         | Varies | Don't know                    |
| Feasibility           | No                                   | Probably no                                   | Probably yes                                             | Yes                                     |                         | Varies | Don't know                    |

Tabla 16.4. Resumen de la evidencia del tratamiento con macrólidos en la prevención de las agudizaciones de la EPOC

| Quality assessment                                      |                   |              |                        |              |                      |                      | N° of patients  |                 | Effect                         |                                                                    | Quality           | Importance |
|---------------------------------------------------------|-------------------|--------------|------------------------|--------------|----------------------|----------------------|-----------------|-----------------|--------------------------------|--------------------------------------------------------------------|-------------------|------------|
| N° of studies                                           | Study design      | Risk of bias | Inconsistency          | Indirectness | Imprecision          | Other considerations | Macrolide       | Placebo         | Relative (95% CI)              | Absolute (95% CI)                                                  |                   |            |
| COPD exacerbation rate (exacerbations per patient-year) |                   |              |                        |              |                      |                      |                 |                 |                                |                                                                    |                   |            |
| 3 <sup>1</sup>                                          | randomised trials | none         | serious <sup>2,5</sup> | none         | serious <sup>3</sup> | none                 | 658             | 660             | Rate ratio 0.76 (0.68 to 0.86) | Rate difference 0.40 fewer (0.24 fewer to 0.55 fewer) <sup>4</sup> | ⊕⊕⊕○<br>MODE-RATE | CRITICAL   |
| Time to first exacerbation (days)                       |                   |              |                        |              |                      |                      |                 |                 |                                |                                                                    |                   |            |
| 3 <sup>1</sup>                                          | randomised trials | none         | none                   | none         | none                 | none                 | 658             | 660             | --                             | Mean difference 81.53 fewer (53.29 fewer to 109.77 fewer)          | ⊕⊕⊕⊕<br>HIGH      | CRITICAL   |
| Hospitalisation                                         |                   |              |                        |              |                      |                      |                 |                 |                                |                                                                    |                   |            |
| 3 <sup>1</sup>                                          | randomised trials | none         | none                   | none         | serious <sup>3</sup> | none                 | 658             | 660             | not estimable <sup>6</sup>     | not estimable <sup>6</sup>                                         | ⊕⊕⊕○<br>MODE-RATE | CRITICAL   |
| Serious adverse events                                  |                   |              |                        |              |                      |                      |                 |                 |                                |                                                                    |                   |            |
| 3 <sup>7</sup>                                          | randomised trials | none         | none                   | none         | serious <sup>5</sup> | none                 | 187/660 (28.3%) | 217/658 (33.0%) | Risk ratio 0.86 (0.74 to 1.01) | 46 fewer per 1000 (from 86 fewer to 3 more)                        | ⊕⊕⊕○<br>MODE-RATE | CRITICAL   |
| Mortality                                               |                   |              |                        |              |                      |                      |                 |                 |                                |                                                                    |                   |            |
| 3 <sup>7</sup>                                          | randomised trials | none         | none                   | none         | serious <sup>5</sup> | none                 | 18/660 (2.7%)   | 20/657 (3.0%)   | Risk ratio 0.90 (0.48 to 1.69) | 3 fewer per 1000 (from 17 fewer to 23 more)                        | ⊕⊕⊕○<br>MODE-RATE | CRITICAL   |
| Acquisition of macrolide-resistant bacteria             |                   |              |                        |              |                      |                      |                 |                 |                                |                                                                    |                   |            |
| 2 <sup>3</sup>                                          | randomised trials | none         | serious <sup>8</sup>   | none         | none                 | none                 | 605             | 604             | not estimable <sup>9</sup>     | not estimable <sup>9</sup>                                         | ⊕⊕⊕○<br>MODE-RATE | IMPOR-TANT |

Tabla 16.4. Resumen de la evidencia del tratamiento con macrólidos en la prevención de las agudizaciones de la EPOC (cont.)

| Quality assessment                                                                                              |                   |                       |                       |              |             |                      | N° of patients |         | Effect            |                                                       | Quality           | Importance |
|-----------------------------------------------------------------------------------------------------------------|-------------------|-----------------------|-----------------------|--------------|-------------|----------------------|----------------|---------|-------------------|-------------------------------------------------------|-------------------|------------|
| N° of studies                                                                                                   | Study design      | Risk of bias          | Inconsistency         | Indirectness | Imprecision | Other considerations | Macrolide      | Placebo | Relative (95% CI) | Absolute (95% CI)                                     |                   |            |
| Quality of Life (St. George's Respiratory Questionnaire score) (Lower values indicate a better quality of life) |                   |                       |                       |              |             |                      |                |         |                   |                                                       |                   |            |
| Total                                                                                                           |                   |                       |                       |              |             |                      |                |         |                   |                                                       |                   |            |
| 2 <sup>3</sup>                                                                                                  | randomised trials | serious <sup>10</sup> | none                  | none         | none        | none                 | 491            | 498     | -                 | Mean difference 2.18 lower (1.53 lower to 2.82 lower) | ⊕⊕⊕○<br>MODE-RATE | IMPOR-TANT |
| Symptoms                                                                                                        |                   |                       |                       |              |             |                      |                |         |                   |                                                       |                   |            |
| 2 <sup>3</sup>                                                                                                  | randomised trials | serious <sup>10</sup> | none                  | none         | none        | none                 | 491            | 498     | -                 | Mean difference 3.36 lower (2.42 lower to 4.29 lower) | ⊕⊕⊕○<br>MODE-RATE | IMPOR-TANT |
| Activity                                                                                                        |                   |                       |                       |              |             |                      |                |         |                   |                                                       |                   |            |
| 2 <sup>3</sup>                                                                                                  | randomised trials | serious <sup>10</sup> | not serious           | none         | none        | none                 | 491            | 498     | -                 | Mean difference 1.82 lower (1.03 lower to 2.62 lower) | ⊕⊕⊕○<br>MODE-RATE | IMPOR-TANT |
| Impacts                                                                                                         |                   |                       |                       |              |             |                      |                |         |                   |                                                       |                   |            |
| 2 <sup>3</sup>                                                                                                  | randomised trials | serious <sup>10</sup> | serious <sup>11</sup> | none         | none        | none                 | 491            | 498     | -                 | Mean difference 2.04 lower (1.28 lower to 2.81 lower) | ⊕⊕○○<br>LOW       | IMPOR-TANT |

<sup>1</sup>Seemungal 2008, Albert 2011, and Uzun 2014.

<sup>2</sup>Inconsistency Rate Ratio 3 ECA:  $I^2 = 57\%$ ,  $p_{het} = 0.10$ .

<sup>3</sup>Wide 95% confidence intervals: the ends of the confidence interval would lead to different clinical decisions.

<sup>4</sup>Albert 2011 and Uzun 2014.

<sup>5</sup>Inconsistency Rate difference 2 ECA:  $I^2 = 85\%$ ,  $p_{het} = 0.010$ .

<sup>6</sup>The data could not be pooled because it was reported in different ways. Seemungal 2008 reported a non-significant decrease in the proportion of exacerbations that are severe enough to require hospitalization (7.4% versus 11.4%, risk ratio 0.66, 95% CI 0.27 to 1.65). Albert 2010 reported a non-significant reduction in the rate of hospitalization due to COPD (0.34 hospitalizations per patient-year versus 0.49 hospitalizations per patient-year, hazard ratio 0.82, 95% CI 0.64 to 1.07). Uzun 2014 reported a non-significant increase in the time to first hospitalization (282 days versus 258 days,  $p = 0.48$ ) and a non-significant decrease in the proportion of exacerbations that are severe enough to require hospitalization (29.8% versus 24%, risk ratio 1.24, 95% CI 0.79 to 1.94).

<sup>7</sup>Suzuki 2001, Albert 2011, and Uzun 2014.

<sup>8</sup>One of the trials found an increase in the acquisition of macrolide-resistant organisms among patients who received macrolides, whereas the other trial found a decrease in the acquisition of macrolide-resistant organisms among patients who received macrolides.

<sup>9</sup>The data could not be pooled because one of the trials did not report the crude data. Albert 2011 reported the acquisition of macrolide-resistant organisms in 81% of patients who received macrolides and 41% of patients who received placebo; Uzun 2014 reported the acquisition of macrolide-resistant organisms in fewer patients who received macrolides than who received placebo (6% versus 24%, risk ratio 0.57, 95% CI 0.15 to 2.26).

<sup>10</sup>A large number of patients did not have quality of life assessed.

<sup>11</sup>Inconsistency:  $I^2 = 38\%$ ,  $p_{het} = 0.20$ .

## Referencias

- Sethi S, Jones PW, Schmitt Terron M, Miravittles M, Rubinstein E, Wedzicha JA, et al; the PULSE Study Group. Pulsed moxifloxacin for the prevention of exacerbations of chronic obstructive pulmonary disease: a randomized controlled trial. *Respir Res*. 2010;11:10.
- \*Herath SC, Poole P. Prophylactic antibiotic therapy for chronic obstructive pulmonary disease (COPD). *Cochrane Database Syst Rev*. 2013;11:CD009764.
- \*\*Suzuki T, Yanai M, Yamaya M, Satoh-Nakawaga T, Sekizawa K, Ishida S, et al. Erythromycin and common cold in COPD. *Chest*. 2001;120:730-3.
- \*\*Seemungal TAR, Wilkinson TMA, Hurst JR, Perera WR, Sapsford RJ, Wedzicha JA. Long-term erythromycin therapy is associated with decreased chronic obstructive pulmonary disease exacerbations. *Am J Crit Care Med*. 2008;178:1139-47.
- \*\*Albert RK, Connett J, Bailey WC, Casaburi R, Cooper JA Jr, Criner GJ, et al. Azithromycin for prevention of exacerbations of COPD. *N Engl J Med*. 2011;365:689-98.
- \*\*Uzun S, Djamin RS, Kluytmans JA, Mulder PG, Van't Veer NE, Ermens AA, et al. Azithromycin maintenance treatment in patients with frequent exacerbations of chronic obstructive pulmonary disease (COLUMBUS): a randomised, double-blind, placebo-controlled trial. *Lancet Respir Med*. 2014;2:361-8.

\*Revisión sistemática.

\*\*Estudio clínico aleatorizado.

# Antibióticos en el tratamiento ambulatorio de las exacerbaciones de la EPOC

## P17. Pregunta para responder:

En los pacientes con EPOC, ¿se recomienda el uso de antibióticos en el tratamiento ambulatorio de las agudizaciones?

Se identificó una revisión sistemática (RS) reciente<sup>1</sup>, que incluye 9 ensayos clínicos que evalúan el uso de antibióticos en el tratamiento ambulatorio de las exacerbaciones de la EPOC.

Se seleccionaron para el análisis 2 de los 9 estudios<sup>2,3</sup>, con un total de 483 participantes.

Las razones de exclusión de los 7 estudios restantes fueron:

- El diagnóstico de EPOC no estaba adecuadamente descrito, no había datos de espirometría.

- Estudios publicados antes de 1970.
- Resultados de no respuesta al tratamiento evaluados a muy corto plazos (5 días) o no disponibilidad del texto completo del estudio.

Un ensayo clínico aleatorizado (ECA) asignó de forma aleatoria a los pacientes a recibir un placebo o amoxicilina/ácido clavulánico durante 8 días. El otro estudio asignó de forma similar a recibir un placebo o trimetoprim/sulfametoxazol, amoxicilina o doxiciclina durante 7-10 días.

## LOS ANTIBIÓTICOS FRENTE A UN PLACEBO

|                                                                                                |                         |
|------------------------------------------------------------------------------------------------|-------------------------|
| <b>Fracaso terapéutico (no resolución de los síntomas, deterioro de los síntomas o muerte)</b> | <b>Calidad moderada</b> |
|------------------------------------------------------------------------------------------------|-------------------------|

En el análisis conjunto de los datos, el tratamiento antibiótico muestra menos fracasos terapéuticos que el placebo (riesgo relativo [RR]: 0,61 [0,42-0,88]; 107 menos por 1.000, de 33 menos a 159 menos; 2 ECA; 92 eventos).

La confianza en este resultado es moderada, por imprecisión. No se descarta que el efecto de la intervención pueda ser clínicamente poco relevante.

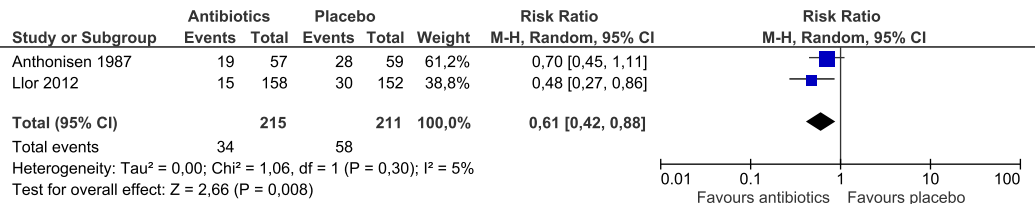

Figura 1. Resultados en relación con el fracaso terapéutico.

|                                                                         |                         |
|-------------------------------------------------------------------------|-------------------------|
| <b>Tiempo hasta la primera exacerbación moderada o grave de la EPOC</b> | <b>Calidad moderada</b> |
|-------------------------------------------------------------------------|-------------------------|

En un estudio, el tratamiento antibiótico muestra un incremento del tiempo hasta la primera exacerbación (media de 73 días más respecto al placebo; mediana de 233 días [rango intercuartílico –IQR–: 110-365] con antibióticos frente a 160 días [IQR: 66-365] con el placebo; p = 0,015; 1 ECA).

La confianza en estos resultados es moderada, porque no se reportan los intervalos de confianza (IC) en los estimadores, de modo que se genera imprecisión en este resultado.

|                                                   |                         |
|---------------------------------------------------|-------------------------|
| <b>Función pulmonar: flujo espiratorio máximo</b> | <b>Calidad moderada</b> |
|---------------------------------------------------|-------------------------|

En 1 estudio, el tratamiento antibiótico muestra un incremento significativo del flujo espiratorio máximo de 14,3 l/min más (1,18 más a 27,42 más) respecto al placebo (1 ECA).

La confianza en este resultado es moderada, por la incertidumbre en el efecto de la intervención; el margen inferior del IC no excluye un resultado clínicamente poco relevante.

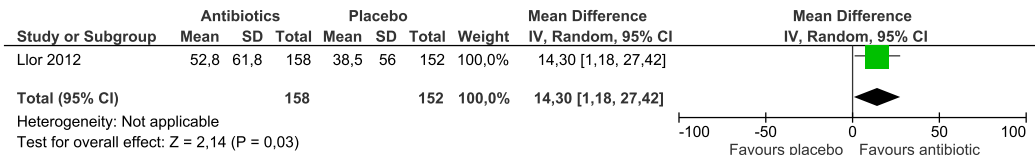

Figura 2. Resultados en relación con el flujo espiratorio máximo.

EFFECTOS ADVERSOS

|            |                       |
|------------|-----------------------|
| Mortalidad | Sin datos disponibles |
|------------|-----------------------|

No se reportan datos respecto a la mortalidad en los estudios seleccionados.

|                  |                  |
|------------------|------------------|
| Efectos adversos | Calidad moderada |
|------------------|------------------|

El tratamiento antibiótico no muestra diferencias significativas en la frecuencia total de eventos adversos respecto al placebo (RR: 1,84 [0,95-3,57]; 1 ECA; 310 eventos), aunque la tendencia es a una mayor frecuencia en los pacientes tratados con antibióticos.

El estudio refiere que, de los 35 casos con efectos adversos posiblemente relacionados con el tratamiento, 32 estaban relacionados con

síntomas gastrointestinales. En 2 pacientes asignados al grupo de amoxicilina-ácido clavulánico, estas molestias causaron la interrupción del tratamiento.

La confianza en este resultado es moderada, por la imprecisión en el efecto de la intervención.

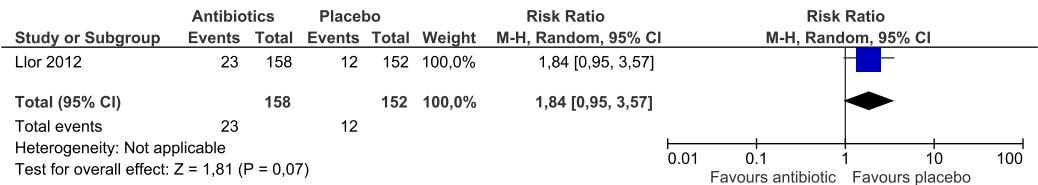

Figura 3. Resultados en relación con los efectos adversos.

|                          |                         |
|--------------------------|-------------------------|
| Balance riesgo/beneficio | Calidad global moderada |
|--------------------------|-------------------------|

El tratamiento empírico con antibióticos orales en pacientes con agudización de la EPOC de leve a moderada disminuye el fracaso terapéutico y aumenta el tiempo transcurrido hasta la siguiente exacerbación.

No hay diferencias significativas en la frecuencia global de los efectos adversos, aunque el número de pacientes y de eventos evaluados fue muy escaso. No se han identificado estudios que reporten datos sobre la mortalidad.

Es probable que los pacientes que se benefician más de esta aproximación terapéutica sean pacientes en los que se tenga la sospecha clínica de infección. Están descritos como indicadores de infección el aumento de la disnea, el aumento del volumen y la presencia de esputo purulento.

Se debe tener precaución en la generación de resistencias al tratamiento, pautando las dosis correctas durante el tiempo adecuado. Este riesgo se vería incrementado en pacientes en los que no esté clara la probabilidad de infección.

El grupo elaborador de la guía considera que los beneficios de administrar antibióticos orales en un contexto de atención ambulatoria podrían superar a los inconvenientes, si la sospecha clínica es sugestiva de infección o si, tras una evaluación individualizada, encontramos criterios clínicos de gravedad de la enfermedad de base con elevado riesgo de fracaso terapéutico.

La calidad de la evidencia es moderada, por la imprecisión de algunos resultados.

|                 |               |
|-----------------|---------------|
| Recomendaciones | Débil a favor |
|-----------------|---------------|

En un contexto de atención ambulatoria, en los pacientes con exacerbación de la EPOC con sospecha de infección, definida por la presencia de esputo purulento o cambios en el color del esputo, se sugiere la administración de antibióticos orales.

**Especificaciones:** La selección del antibiótico debe considerar los patrones locales de resistencia a los patógenos más comunes.

En exacerbaciones leves o moderadas, la presencia de un esputo purulento o el cambio en el color del esputo se pueden considerar como indicadores de infección.

La gravedad de la enfermedad de base es un factor que puede aconsejar el tratamiento antibiótico.



Tabla 17.1. Resumen de conclusiones

|                       | Judgement                            |                                               |                                                          |                                         |                         |        |                               |
|-----------------------|--------------------------------------|-----------------------------------------------|----------------------------------------------------------|-----------------------------------------|-------------------------|--------|-------------------------------|
| Desirable effects     | Trivial                              | Small                                         | <b>Moderate</b>                                          | Large                                   |                         | Varies | Don't know                    |
| Undesirable effects   | Large                                | Moderate                                      | <b>Small</b>                                             | Trivial                                 |                         | Varies | Don't know                    |
| Certainty of evidence | Very low                             | Low                                           | <b>Moderate</b>                                          | High                                    |                         |        | No included studies           |
| Values                | Important uncertainty or variability | Possibly important uncertainty or variability | Probably no important uncertainty or variability         | No important uncertainty or variability |                         |        | No known undesirable outcomes |
| Balance of effects    | Favors the comparison                | Probably favors the comparison                | Does not favor either the intervention or the comparison | Probably favors the intervention        | Favors the intervention | Varies | Don't know                    |
| Resources required    | Large costs                          | Moderate costs                                | Negligible costs and savings                             | Moderate savings                        | Large savings           | Varies | Don't know                    |
| Acceptability         | No                                   | Probably no                                   | <b>Probably yes</b>                                      | Yes                                     |                         | Varies | Don't know                    |
| Feasibility           | No                                   | Probably no                                   | Probably yes                                             | <b>Yes</b>                              |                         | Varies | Don't know                    |

Tabla 17.2. Resumen de la evidencia del tratamiento antibiótico en las agudizaciones ambulatorias de la EPOC

| Quality assessment                     |                   |              |               |              |                      |                      | N° of patients                                                                                                                       |                | Effect                 |                                                 | Quality           | Importance |
|----------------------------------------|-------------------|--------------|---------------|--------------|----------------------|----------------------|--------------------------------------------------------------------------------------------------------------------------------------|----------------|------------------------|-------------------------------------------------|-------------------|------------|
| N° of studies                          | Study design      | Risk of bias | Inconsistency | Indirectness | Imprecision          | Other considerations | Antibiotics                                                                                                                          | Placebo        | Relative (95% CI)      | Absolute (95% CI)                               |                   |            |
| Treatment failure                      |                   |              |               |              |                      |                      |                                                                                                                                      |                |                        |                                                 |                   |            |
| 2                                      | randomised trials | not serious  | not serious   | not serious  | serious <sup>1</sup> | none                 | 34/215 (15.8%)                                                                                                                       | 58/211 (27.5%) | RR 0.61 (0.42 to 0.88) | 107 fewer per 1000 (from 33 fewer to 159 fewer) | ⊕⊕⊕○<br>MODE-RATE | CRITICAL   |
| Adverse events                         |                   |              |               |              |                      |                      |                                                                                                                                      |                |                        |                                                 |                   |            |
| 1                                      | randomised trials | not serious  | not serious   | not serious  | serious <sup>2</sup> | none                 | 23/158 (14.6%)                                                                                                                       | 12/152 (7.9%)  | RR 1.84 (0.95 to 3.57) | 66 more per 1000 (from 4 fewer to 203 more)     | ⊕⊕⊕○<br>MODE-RATE | CRITICAL   |
| Time to next exacerbation              |                   |              |               |              |                      |                      |                                                                                                                                      |                |                        |                                                 |                   |            |
| 1                                      | randomised trials | not serious  | not serious   | not serious  | serious <sup>3</sup> | none                 | Diff med = 73 days. Median 233 days (IQR 110-365) with antibiotics vs. 160 days (IQR 66 to 365) with placebo; p = 0.015 <sup>4</sup> |                |                        |                                                 | ⊕⊕⊕○<br>MODE-RATE | CRITICAL   |
| Mortality - not reported               |                   |              |               |              |                      |                      |                                                                                                                                      |                |                        |                                                 |                   |            |
| -                                      | -                 | -            | -             | -            | -                    | -                    | -                                                                                                                                    | -              | -                      | -                                               | -                 | CRITICAL   |
| Peak expiratory flow                   |                   |              |               |              |                      |                      |                                                                                                                                      |                |                        |                                                 |                   |            |
| 1                                      | randomised trials | not serious  | not serious   | not serious  | serious <sup>1</sup> | none                 | 158                                                                                                                                  | 152            | -                      | MD 14.3 more (1.18 more to 27.42 more)          | ⊕⊕⊕○<br>MODE-RATE | IMPOR-TANT |
| Length of hospital stay - not reported |                   |              |               |              |                      |                      |                                                                                                                                      |                |                        |                                                 |                   |            |
| -                                      | -                 | -            | -             | -            | -                    | -                    | -                                                                                                                                    | -              | -                      | -                                               | -                 | IMPOR-TANT |
| Hospital admissions - not reported     |                   |              |               |              |                      |                      |                                                                                                                                      |                |                        |                                                 |                   |            |
| -                                      | -                 | -            | -             | -            | -                    | -                    | -                                                                                                                                    | -              | -                      | -                                               | -                 | IMPOR-TANT |

CI: Confidence interval; RR: Risk ratio; MD: Mean difference.

<sup>1</sup> 95% CI does not exclude a negligible effect.<sup>2</sup> Low number of events; 95% CI does not exclude benefit or important harm.<sup>3</sup> 95% CI not provided.<sup>4</sup> Patient level data was not reported; therefore, the difference in the medians with 95% CI could not be calculated via a Wilcoxon-Mann-Whitney test.

## Referencias

1. Vollenweider D, Jarrett H, Steurer-Stey C, Garcia-Aymerich J, Puhan MA. Antibiotics for exacerbations of chronic obstructive pulmonary disease. *Cochrane Database Syst Rev*. 2012;(12):CD010257.
2. Anthonisen NR, Manfreda J, Warren C, Hershfield E, Harding G, Nelson N. Antibiotic therapy in exacerbations of chronic obstructive pulmonary disease. *Ann Intern Med*. 1987;106:196-204.
3. Llor C, Moragas A, Hernández S, Bayona C, Miravittles M. Efficacy of antibiotic therapy for acute exacerbations of mild to moderate chronic obstructive pulmonary disease. *Am J RespCrit Care Med*. 2012;186:716-23.

# Corticoides sistémicos en la exacerbación de la EPOC: pacientes hospitalizados

## P18. Pregunta para responder:

En pacientes con EPOC hospitalizados, ¿se recomienda administrar corticoides por vía intravenosa frente a corticoides por vía oral para el tratamiento de las exacerbaciones?

Se identificaron 2 estudios clínicos aleatorizados (ECA), que incluyeron un total de 250 pacientes hospitalizados por exacerbación de la EPOC.

En un estudio<sup>1</sup>, los pacientes tenían volumen espiratorio forzado en el primer segundo (FEV<sub>1</sub>) < 80%. Se excluyeron los pacientes con exacerbación muy grave con pH arterial < 7,26. El estudio distribuyó de forma aleatoria a 210 pacientes a recibir 60 mg de prednisolona intravenosa (i.v.) y un placebo vía oral (v.o.) o 60 mg de prednisolona v.o. y un placebo i.v. durante 5 días. Ambos grupos recibieron

prednisolona v.o. después, durante 5 días más, para completar el tratamiento a dosis completa (duración total del tratamiento: 10 días).

El otro estudio<sup>2</sup> incluyó pacientes con exacerbación de la EPOC que, según criterio médico, requerían ingreso. Se excluyeron los pacientes con neumonía, hipertensión o diabetes no controladas, bronquiectasias, necesidad de ventilación mecánica, uso de corticoides sistémicos durante el mes previo y hemorragia intestinal en los 3 meses previos. Incluyó 40 pacientes, a los que se les asignó de forma aleatoria a recibir 32 mg/día de metilprednisolona v.o. durante 7 días o 1 mg/kg/día de metilprednisolona i.v. durante 4 días, seguidos de 0,5 mg/kg/día de metilprednisolona i.v. durante 3 días (duración total del tratamiento: 7 días). Durante los primeros 2 días de tratamiento, 2 pacientes del grupo de terapia v.o. dejaron el estudio debido a que presentaron insuficiencia respiratoria grave. Estos pacientes tenían FEV<sub>1</sub> de ingreso < 30% y PaO<sub>2</sub> ≤ 45 mmHg.

## RESUMEN DE RESULTADOS: CORTICOIDES SISTÉMICOS FRENTE A CORTICOIDES ORALES

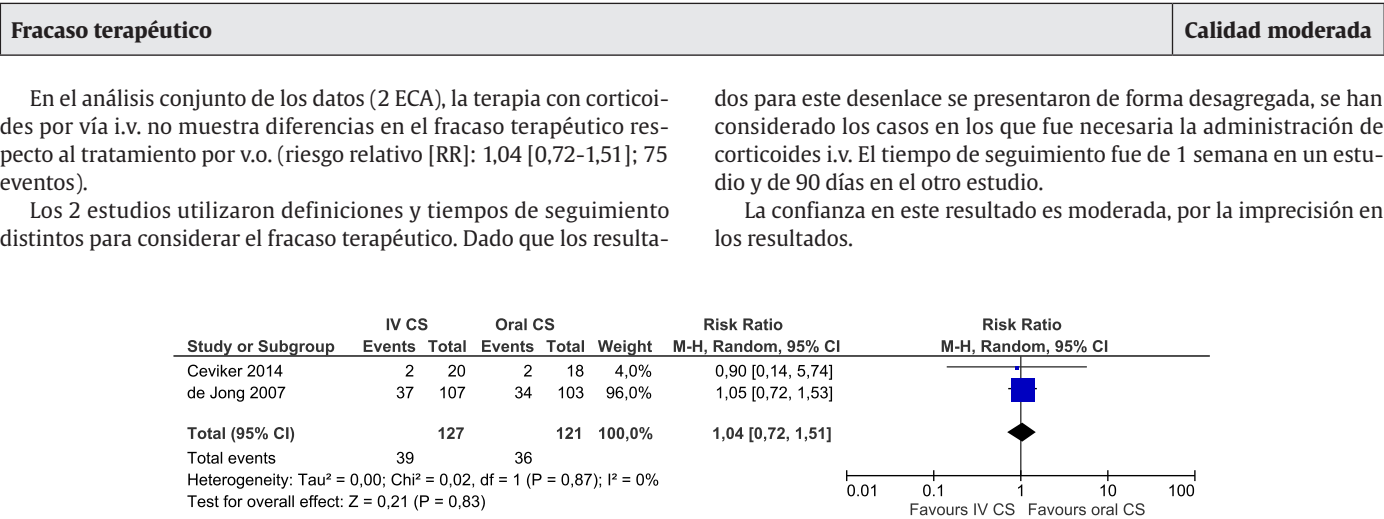

Figura 1. Resultados en relación con el fracaso terapéutico.

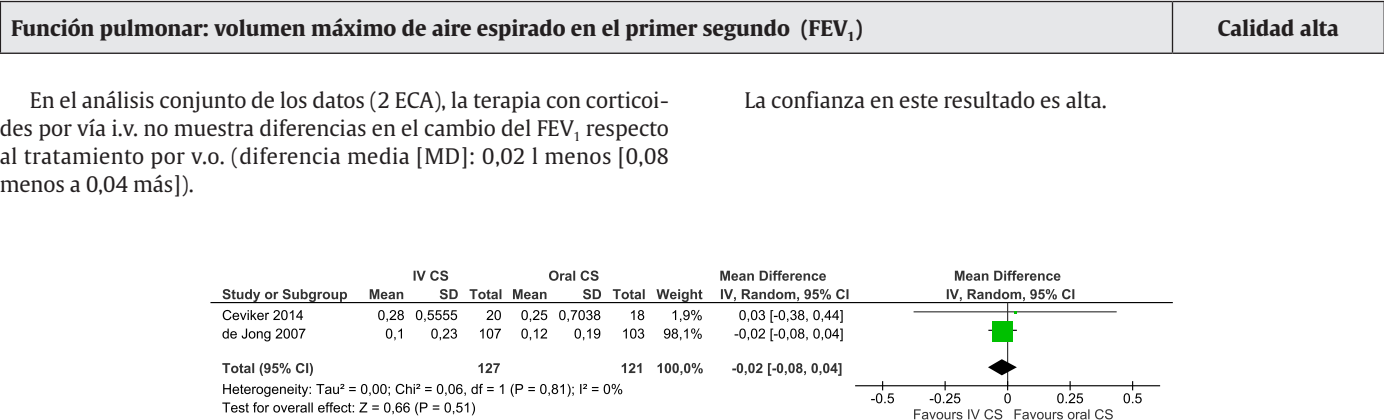

Figura 2. Resultados en relación con el volumen máximo de aire espirado en el primer segundo (FEV<sub>1</sub>).

**Calidad de vida: escala SGRQ (Saint George's Respiratory Questionnaire) - puntuación total**

**Calidad muy baja**

Un solo estudio evaluó la calidad de vida al primer día y a la semana de seguimiento, por lo que se considera que estos resultados carecen de relevancia clínica.

**Estancia hospitalaria**

**Calidad moderada**

En el análisis conjunto de los datos (2 ECA), la terapia con corticoides por vía i.v. no muestra diferencias en la estancia hospitalaria respecto al tratamiento por v.o. (MD: 0,71 días más [1,35 menos a 2,78 más]).

La confianza en este resultado es moderada debido a la imprecisión en los resultados.

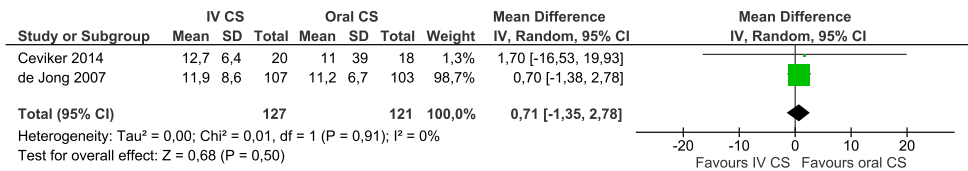

Figura 3. Resultados en relación con la estancia hospitalaria.

**Reingresos**

**Calidad moderada**

En el análisis conjunto de los datos (2 ECA), la terapia con corticoides por vía i.v. no muestra diferencias en el número de reingresos respecto a la terapia por v.o. (RR: 1,13 [0,60-2,13]; 33 eventos).

La confianza en este resultado es moderada, por la imprecisión de los resultados.

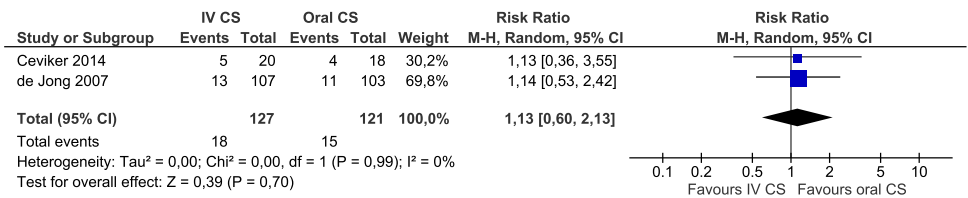

Figura 4. Resultados en relación con los reingresos.

**EFFECTOS ADVERSOS**

**Eventos adversos (hiperglucemia)**

**Calidad baja**

El tratamiento con corticoides por vía i.v. muestra un mayor número de casos de hiperglucemia secundaria al tratamiento comparado con el tratamiento por v.o., pero sin que esta diferencia llegue a ser significativa (RR: 2,48 [0,96-6,41]; 1 ECA).

La confianza es baja, por presentar limitaciones en el diseño (estudio abierto) y por la imprecisión de los resultados.

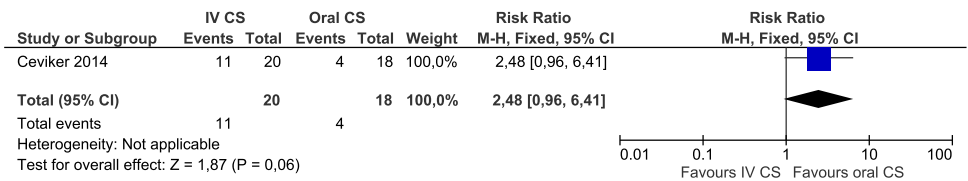

Figura 5. Resultados en relación con los eventos adversos (hiperglucemia).

|                   |                     |
|-------------------|---------------------|
| <b>Mortalidad</b> | <b>Calidad baja</b> |
|-------------------|---------------------|

En el análisis conjunto de los datos, la terapia con corticoides por vía i.v. no muestra diferencias en la mortalidad respecto a la terapia por v.o. (RR: 0,90 [0,07-10,77]; 2 ECA; 9 eventos).

La confianza es baja, por la imprecisión de los resultados.

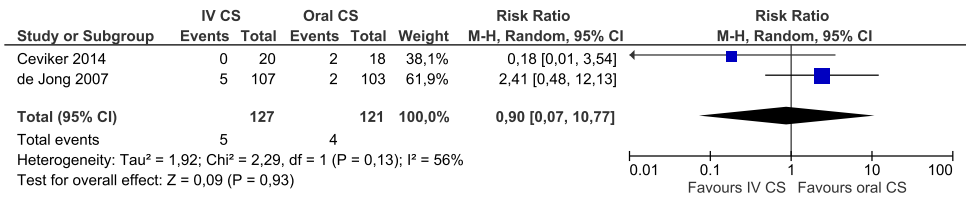

Figura 6. Resultados en relación con la mortalidad

|                                 |
|---------------------------------|
| <b>Balance riesgo/beneficio</b> |
|---------------------------------|

La evidencia disponible respecto a la eficacia comparativa de los corticoides sistémicos u orales en pacientes hospitalizados por una exacerbación de la EPOC es escasa. Se han identificado solo 2 estudios de tamaño limitado. De forma general, no detectaron diferencias relevantes en los beneficios entre las 2 vías de administración y solo se detectó una tendencia a presentar más hiperglucemias entre los pacientes que recibieron los corticoides por vía i.v., aunque el número de eventos evaluados fue muy escaso. Aunque los estudios no lo han evaluado, la administración i.v. de fármacos se asocia con reacciones locales (flebitis, tromboflebitis), así como con un incremento de las infecciones sistémicas.

La principal limitación de la confianza en los resultados fue la imprecisión de los resultados, por el escaso número de pacientes y eventos analizados.

El grupo elaborador de la guía considera que la mayoría de los pacientes preferiría la administración v.o. de corticoides a la i.v., por ser menos invasiva y presentar un menor riesgo de reacciones locales o sistémicas.

En pacientes hospitalizados por exacerbación de la EPOC que requieran administración de corticoides sistémicos, los beneficios de la administración v.o. de corticoides probablemente superen a los potenciales inconvenientes en relación con una administración i.v.

|                        |                              |
|------------------------|------------------------------|
| <b>Recomendaciones</b> | <b>Condicional en contra</b> |
|------------------------|------------------------------|

En pacientes con EPOC hospitalizados por una exacerbación que toleren la v.o. y que requieran la administración de corticoides sistémicos, se sugiere utilizar preferentemente la v.o.

**Especificaciones:** los estudios excluyeron a los pacientes más graves, con necesidad de ventilación mecánica, pH < 7,26 o hipercápnicos (PaCO<sub>2</sub> > 70 mmHg).

Tabla 18.1. Resumen de conclusiones

|                       | Judgement                            |                                               |                                                           |                                         |                          |        |                               |
|-----------------------|--------------------------------------|-----------------------------------------------|-----------------------------------------------------------|-----------------------------------------|--------------------------|--------|-------------------------------|
| Desirable effects     | Trivial                              | Small                                         | Moderate                                                  | Large                                   |                          | Varies | Don't know                    |
| Undesirable effects   | Large                                | Moderate                                      | Small                                                     | Trivial                                 |                          | Varies | Don't know                    |
| Certainty of evidence | Very low                             | Low                                           | Moderate                                                  | High                                    |                          |        | No included studies           |
| Values                | Important uncertainty or variability | Possibly important uncertainty or variability | Probably no important uncertainty or variability          | No important uncertainty or variability |                          |        | No known undesirable outcomes |
| Balance of effects    | Favours the comparison               | Probably favours the comparison               | Does not favour either the intervention or the comparison | Probably favours the intervention       | Favours the intervention | Varies | Don't know                    |
| Resources required    | Large costs                          | Moderate costs                                | Negligible costs and savings                              | Moderate savings                        | Large savings            | Varies | Don't know                    |
| Acceptability         | No                                   | Probably no                                   | Probably yes                                              | Yes                                     |                          | Varies | Don't know                    |
| Feasibility           | No                                   | Probably no                                   | Probably yes                                              | Yes                                     |                          | Varies | Don't know                    |

Tabla 18.2. Resumen de la evidencia sobre la eficacia de los corticosteroides IV frente a los orales en las agudizaciones de la EPOC

| Quality assessment             |                    |                          |               |                           |                           |                      | N° of patients |                | Effect                         |                                                      | Quality        | Importance |
|--------------------------------|--------------------|--------------------------|---------------|---------------------------|---------------------------|----------------------|----------------|----------------|--------------------------------|------------------------------------------------------|----------------|------------|
| N° of studies                  | Study design       | Risk of bias             | Inconsistency | Indirectness              | Imprecision               | Other considerations | IV CS          | Oral CS        | Relative (95% CI)              | Absolute (95% CI)                                    |                |            |
| Mortality                      |                    |                          |               |                           |                           |                      |                |                |                                |                                                      |                |            |
| 2                              | ran-domised trials | not serious <sup>1</sup> | not serious   | not serious               | very serious <sup>2</sup> | none                 | 5/127 (3.9%)   | 4/121 (3.3%)   | <b>RR 0.90</b> (0.07 to 10.77) | <b>3 fewer per 1000</b> (from 31 fewer to 323 more)  | ⊕⊕○○ LOW       | CRITICAL   |
| Treatment failure              |                    |                          |               |                           |                           |                      |                |                |                                |                                                      |                |            |
| 2                              | ran-domised trials | not serious <sup>1</sup> | not serious   | not serious               | serious <sup>2</sup>      | none                 | 39/127 (30.7%) | 36/121 (29.8%) | <b>RR 1.04</b> (0.72 to 1.51)  | <b>12 more per 1000</b> (from 83 fewer to 152 more)  | ⊕⊕⊕○ MODE-RATE | CRITICAL   |
| Adverse Events (Hyperglycemia) |                    |                          |               |                           |                           |                      |                |                |                                |                                                      |                |            |
| 1                              | ran-domised trials | serious <sup>3</sup>     | not serious   | not serious               | serious <sup>2</sup>      | none                 | 11/20 (55.0%)  | 4/18 (22.2%)   | <b>RR 2.48</b> (0.96 to 6.41)  | <b>329 more per 1000</b> (from 9 fewer to 1000 more) | ⊕⊕○○ LOW       | CRITICAL   |
| Hospitalisation                |                    |                          |               |                           |                           |                      |                |                |                                |                                                      |                |            |
| 2                              | ran-domised trials | not serious <sup>1</sup> | not serious   | not serious               | serious <sup>2</sup>      | none                 | 18/127 (14.2%) | 15/121 (12.4%) | <b>RR 1.13</b> (0.60 to 2.13)  | <b>16 more per 1000</b> (from 50 fewer to 140 more)  | ⊕⊕⊕○ MODE-RATE | IMPOR-TANT |
| Change in FEV <sub>1</sub>     |                    |                          |               |                           |                           |                      |                |                |                                |                                                      |                |            |
| 2                              | ran-domised trials | not serious              | not serious   | not serious               | not serious               | none                 | 127            | 121            | -                              | <b>MD 0.02 fewer</b> (0.08 fewer to 0.04 more)       | ⊕⊕⊕⊕ HIGH      | IMPOR-TANT |
| QoL (assessed with: SGRQ)      |                    |                          |               |                           |                           |                      |                |                |                                |                                                      |                |            |
| 1                              | ran-domised trials | not serious              | not serious   | very serious <sup>4</sup> | serious <sup>5</sup>      | none                 | 107            | 103            | -                              | <b>MD 0.7 more</b> (2.93 fewer to 4.33 more)         | ⊕○○○ VERY LOW  | IMPOR-TANT |
| Length of hospital stay        |                    |                          |               |                           |                           |                      |                |                |                                |                                                      |                |            |
| 2                              | ran-domised trials | not serious <sup>1</sup> | not serious   | not serious               | serious <sup>5</sup>      | none                 | 127            | 121            | -                              | <b>MD 0.71 more</b> (1.35 fewer to 2.78 more)        | ⊕⊕⊕○ MODE-RATE | IMPOR-TANT |

CI: Confidence interval; RR: Risk ratio; MD: Mean difference.

<sup>1</sup> Although one study (Ceviker 2014) was open-label, this probably had no impact since its contribution to the overall result is minimal.<sup>2</sup> Very low number of events and wide 95% CI.<sup>3</sup> The study was open-label.<sup>4</sup> SGRQ quality of life questionnaire assessed at one week.<sup>5</sup> 95% CI boundaries do not exclude important benefit or harm.

## Referencias

- De Jong YP, Uil SM, Grotjohan HP, Postma DS, Kerstjens HA, Van den Berg JW. Oral or IV prednisolone in the treatment of COPD exacerbations: a randomized, controlled, double-blind study. *Chest*. 2007;132:1741-7.
- Ceviker Y, Sayiner A. Comparison of two systemic steroid regimens for the treatment of COPD exacerbations. *Pulm Pharmacol Ther*. 2014;27:179-83.

# Tratamiento del tabaquismo durante la agudización de la EPOC

## P19. Pregunta para responder:

En los pacientes con EPOC hospitalizados, ¿se recomienda realizar tratamientos de deshabituación tabáquica en un contexto de agudización de la EPOC respecto al tratamiento habitual?

Se identificaron 3 revisiones sistemáticas (RS) sobre intervenciones de deshabituación tabáquica en pacientes con EPOC y una RS adicional en pacientes hospitalizados: Bartlett et al (2014)<sup>1</sup>, Warnier et al (2013)<sup>2</sup>, Pires-Yfantouda et al (2013)<sup>3</sup> y Rigotti et al (2012)<sup>4</sup>.

Se seleccionaron 6 estudios que evaluaron intervenciones en pacientes con EPOC o enfermedades del aparato respiratorio como motivo de ingreso o atención hospitalaria. La intervención podía ser del tipo cognitivo-conductual o una terapia mixta (incluía tratamiento

con sustitutivos de nicotina: parches o comprimidos) y debía iniciarse durante el proceso de agudización o inmediatamente después.

La intervención se comparó con la atención habitual, un placebo o una intervención menos intensiva.

Todos los estudios fueron abiertos, con serio riesgo de sesgo, y algunos presentaban un alto porcentaje de abandonos en los 2 brazos del tratamiento.

**1. Terapia cognitivo-conductual frente a la atención habitual:** Borglykke et al (2008)<sup>5</sup>, Miller et al (1997)<sup>6</sup> y Pederson et al (1991)<sup>7</sup>.

**2. Enfoque mixto frente a la atención habitual o a un tratamiento menos intensivo:** Campbell et al (1991)<sup>8</sup>, Taylor et al (1996)<sup>9</sup> y Campbell et al (1996)<sup>10</sup>.

## TRATAMIENTO DE DESHABITUACIÓN TABÁQUICA

|                                                 |                  |
|-------------------------------------------------|------------------|
| Abstinencia como mínimo durante 6 meses - total | Calidad muy baja |
|-------------------------------------------------|------------------|

En el análisis conjunto de los datos, el tratamiento para la deshabituación tabáquica no muestra diferencias en el número de pacientes que logran mantener una abstinencia mínima de 6 meses respecto al tratamiento habitual (riesgo relativo [RR]: 1,35 [0,88-2,07]; 6 ensayos clínicos aleatorizados [ECA]; 326 eventos).

La confianza en este resultado es muy baja, por el riesgo de sesgo presente en los estudios, la heterogeneidad entre estudios ( $I^2 = 65\%$ ) y la imprecisión en el efecto global de la intervención.

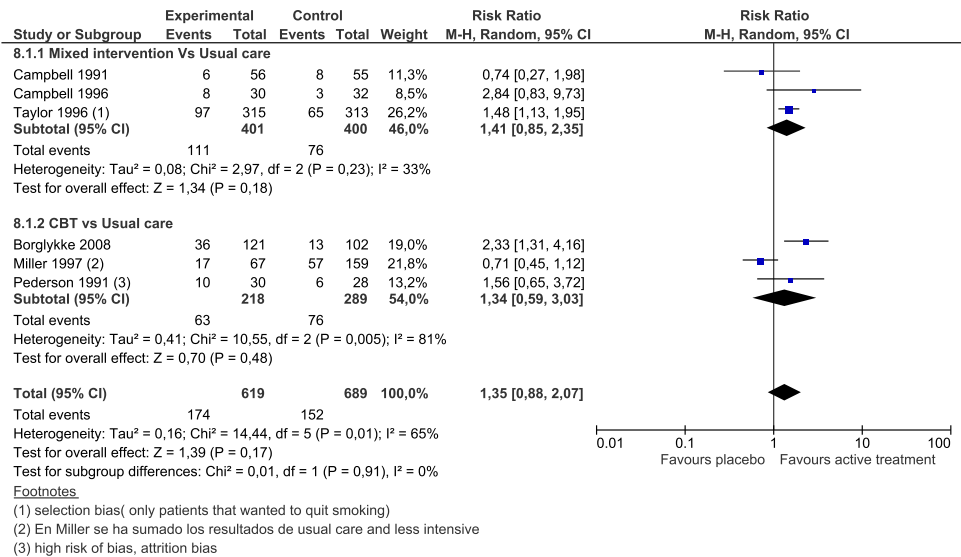

Figura 1. Resultados en relación con la abstinencia como mínimo durante 6 meses – total.

|                                                         |              |
|---------------------------------------------------------|--------------|
| Abstinencia como mínimo durante 6 meses - enfoque mixto | Calidad baja |
|---------------------------------------------------------|--------------|

En el análisis conjunto de los datos, el tratamiento con un enfoque mixto, farmacológico además de tratamiento conductual, no muestra diferencias en el porcentaje de pacientes con abstinencia mínima de 6 meses respecto al tratamiento habitual (RR: 1,41 [0,85-2,35]; 3 ECA).

La confianza en este resultado es baja, por el riesgo de sesgo presente en el diseño de los estudios y la imprecisión en el efecto global de la intervención ( $I^2 = 33\%$ ).



|                                                                                   |                         |
|-----------------------------------------------------------------------------------|-------------------------|
| <b>Abstinencia como mínimo durante 6 meses - tratamiento cognitivo-conductual</b> | <b>Calidad muy baja</b> |
|-----------------------------------------------------------------------------------|-------------------------|

En el análisis conjunto de los datos, el tratamiento cognitivo-conductual no muestra diferencias significativas en el porcentaje de pacientes que mantiene una abstinencia mínima de 6 meses respecto al tratamiento habitual (RR: 1,23 [0,89-1,69]; 3 ECA).

La confianza en este resultado es muy baja, por el riesgo de sesgo en el diseño de los estudios, la alta heterogeneidad y la alta imprecisión en el efecto global de la intervención ( $I^2 = 81\%$ ).

|                                 |                            |
|---------------------------------|----------------------------|
| <b>Balance riesgo/beneficio</b> | <b>Calidad global baja</b> |
|---------------------------------|----------------------------|

La deshabituación tabáquica en pacientes con EPOC en un contexto de agudización respecto al tratamiento habitual podría conseguir mejores resultados de abstinencia, a pesar de que estas diferencias no hayan resultado significativas.

La calidad global es baja, debido principalmente a las limitaciones en el diseño de los estudios y a la imprecisión de los resultados.

No se han detectado resultados relacionados con efectos adversos asociados al tratamiento, pero se asume que, al ser una intervención preventiva, no tiene asociado un incremento de riesgo por la intervención.

No hay duda de los beneficios de las intervenciones orientadas al abandono del hábito tabáquico en pacientes con EPOC, aunque sí las hay sobre el momento de inicio de estas intervenciones.

Los resultados de una RS más amplia en pacientes fumadores hospitalizados, sin especificar el diagnóstico de ingreso<sup>4</sup>, concluyen que, en estos pacientes, las intervenciones conductuales de alta intensidad que se inician durante la estancia hospitalaria y que incluyen, por lo menos, 1 mes de contacto de apoyo después del alta, promueven el abandono del hábito tabáquico. El efecto de estas intervenciones es independiente del diagnóstico y se ha evidenciado tanto en ámbitos de rehabilitación como en hospitales de agudos.

Esta actualización encontró, además, que añadir una terapia de reemplazo de nicotina al consejo intensivo aumenta significativamente la abstinencia comparado con el consejo solo. La evidencia no es concluyente respecto a añadir tratamiento con bupropión o vareniclina al consejo.

No se han detectado estudios de costes, pero la implantación, el desarrollo y el mantenimiento de un programa de deshabituación tabáquica en un contexto de agudización (desde un servicio de urgencias, hasta una hospitalización o en atención primaria) conlleva un incremento de costes asociados, especialmente al inicio, pero, si los resultados fueran favorables a largo plazo, se esperaría encontrar una ganancia en años de vida con calidad, disminución de agudizaciones y ahorro en costes por atención o ingresos evitables.

En los contextos donde exista un programa ya establecido de deshabituación tabáquica, la recomendación de realizar esta intervención es potencialmente viable y factible. La factibilidad y viabilidad, por lo tanto, variarán de acuerdo con la localización geográfica y el ámbito sanitario, y dependerán de las estrategias de gestión en el ámbito local o autonómico.

|                        |                      |
|------------------------|----------------------|
| <b>Recomendaciones</b> | <b>Débil a favor</b> |
|------------------------|----------------------|

De ser posible, se sugiere iniciar la terapia de deshabituación tabáquica durante la hospitalización por agudización de la EPOC.

**Especificaciones:** en los ámbitos donde exista un programa de deshabituación establecido, se debe verificar que la intervención se

dé de forma intensiva y tenga un seguimiento de apoyo de por lo menos 1 mes tras el alta.

Tabla 19.1. Resumen de conclusiones

|                              | Judgement                            |                                               |                                                          |                                         |                         |               |                               |
|------------------------------|--------------------------------------|-----------------------------------------------|----------------------------------------------------------|-----------------------------------------|-------------------------|---------------|-------------------------------|
| <b>Desirable effects</b>     | Trivial                              | <b>Small</b>                                  | Moderate                                                 | Large                                   |                         | Varies        | Don't know                    |
| <b>Undesirable effects</b>   | Large                                | Moderate                                      | Small                                                    | Trivial                                 |                         | Varies        | <b>Don't know</b>             |
| <b>Certainty of evidence</b> | Very low                             | <b>Low</b>                                    | Moderate                                                 | High                                    |                         |               | No included studies           |
| <b>Values</b>                | Important uncertainty or variability | Possibly important uncertainty or variability | Probably no important uncertainty or variability         | No important uncertainty or variability |                         |               | No known undesirable outcomes |
| <b>Balance of effects</b>    | Favors the comparison                | Probably favors the comparison                | Does not favor either the intervention or the comparison | <b>Probably favors the intervention</b> | Favors the intervention | Varies        | Don't know                    |
| <b>Resources required</b>    | Large costs                          | Moderate costs                                | Negligible costs and savings                             | Moderate savings                        | Large savings           | Varies        | Don't know                    |
| <b>Acceptability</b>         | No                                   | Probably no                                   | <b>Probably yes</b>                                      | Yes                                     |                         | Varies        | Don't know                    |
| <b>Feasibility</b>           | No                                   | Probably no                                   | Probably yes                                             | Yes                                     |                         | <b>Varies</b> | Don't know                    |

Tabla 19.2. Resumen de la evidencia del tratamiento del tabaquismo durante la agudización de la EPOC

| Quality assessment                                               |                    |                      |                      |              |                      |                      | N° of patients                                    |                 | Effect                 |                                               | Quality          | Importance |
|------------------------------------------------------------------|--------------------|----------------------|----------------------|--------------|----------------------|----------------------|---------------------------------------------------|-----------------|------------------------|-----------------------------------------------|------------------|------------|
| N° of studies                                                    | Study design       | Risk of bias         | Inconsistency        | Indirectness | Imprecision          | Other considerations | Smoking cessation therapies (in an acute setting) | Placebo         | Relative (95% CI)      | Absolute (95% CI)                             |                  |            |
| Abstinence at least 6 months                                     |                    |                      |                      |              |                      |                      |                                                   |                 |                        |                                               |                  |            |
| 6                                                                | ran-domised trials | serious <sup>1</sup> | serious <sup>2</sup> | not serious  | serious <sup>3</sup> | none                 | 174/619 (28.1%)                                   | 152/689 (22.1%) | RR 1.35 (0.88 to 2.07) | 77 more per 1000 (from 26 fewer to 236 more)  | ⊕○○○<br>VERY LOW | CRITICAL   |
| Abstinence at least 6 months - Mixed intervention vs. Usual care |                    |                      |                      |              |                      |                      |                                                   |                 |                        |                                               |                  |            |
| 3                                                                | ran-domised trials | serious <sup>1</sup> | not serious          | not serious  | serious <sup>3</sup> | none                 | 111/401 (27.7%)                                   | 76/400 (19.0%)  | RR 1.41 (0.85 to 2.35) | 78 more per 1000 (from 29 fewer to 257 more)  | ⊕⊕○○<br>LOW      | CRITICAL   |
| Abstinence at least 6 months - CBT vs. Usual care                |                    |                      |                      |              |                      |                      |                                                   |                 |                        |                                               |                  |            |
| 3                                                                | ran-domised trials | serious <sup>1</sup> | serious <sup>2</sup> | not serious  | serious <sup>3</sup> | none                 | 63/218 (28.9%)                                    | 76/289 (26.3%)  | RR 1.34 (0.59 to 3.03) | 89 more per 1000 (from 108 fewer to 534 more) | ⊕○○○<br>VERY LOW | CRITICAL   |

CI: Confidence interval; RR: Risk ratio.

<sup>1</sup> Data is taken from subgroups. selection bias and open studies.

<sup>2</sup> High heterogeneity between studies (one study -Miller 1996- showed results in the opposite direction and favoured usual care).

<sup>3</sup> 95% IC includes benefits or potencial harms.

Referencias

1. Bartlett YK, Sheeran P, Hawley MS. Effective behaviour change techniques in smoking cessation interventions for people with chronic obstructive pulmonary disease: a meta-analysis. *Br J Health Psychol.* 2014;19:181-203.

2. Warnier MJ, Van Riet EE, Rutten FH, De Bruin ML, Sachs AP. Smoking cessation strategies in patients with COPD. *Eur Respir J.* 2013;41:727-34.

3. Pires-Yfantouda R, Absalom G, Clemens F. Smoking cessation interventions for COPD: a review of the literature. *Respir Care.* 2013;58:1955-62.

4. Rigotti NA, Clair C, Munafò MR, Stead LF. Interventions for smoking cessation in hospitalised patients. *Cochrane Database Syst Rev.* 2012;(5):CD001837.

5. Borglykke A, Pisinger C, Jorgensen T, Ibsen H. The effectiveness of smoking cessation groups offered to hospitalised patients with symptoms of exacerbations of chronic obstructive pulmonary disease (COPD). *Clin Respir J.* 2008;2:158-65.

6. Miller NH, Smith PM, DeBusk RF, Sobel DS, Taylor CB. Smoking cessation in hospitalized patients - Results of a randomized trial. *Arch Intern Med.* 1997;157 409-15.

7. Pederson LL, Wanklin JM, Lefcoe NM. The effects of counseling on smoking cessation among patients hospitalized with chronic obstructive pulmonary disease: a randomized clinical trial. *Int J Addict.* 1991;26:107-19.

8. Campbell IA, Prescott RJ, Tjeder-Burton SM. Smoking cessation in hospital patients given repeated advice plus nicotine or placebo chewing gum. *Respir Med.* 1991;85:155-7.

9. Taylor CB, Miller NH, Herman S, Smith PM, Sobel D, Fisher L, et al. A nurse-managed smoking cessation program for hospitalized smokers. *Am J Public Health.* 1996;86:1557-60.

10. Campbell IA, Prescott RJ, Tjeder-Burton SM. Transdermal nicotine plus support in patients attending hospital with smoking related diseases - a placebo controlled study. *Respir Med.* 1996;90:47-51.

# La hospitalización a domicilio frente a la atención convencional

## P20. Pregunta para responder:

En los pacientes con un episodio de exacerbación de la EPOC, ¿se recomienda la hospitalización a domicilio como alternativa a la atención convencional?

Un programa de control domiciliario, también denominado “hospital a domicilio”, ofrece una opción de alta temprana del hospital o una alternativa a la hospitalización en pacientes que acuden a urgencias por un cuadro de exacerbación de la EPOC.

Se encontró una revisión sistemática<sup>1</sup> que incluye 8 estudios relevantes. Posteriormente se encontró un estudio adicional<sup>2</sup>.

Los ensayos clínicos comparan el control domiciliario con el tratamiento habitual en pacientes con una exacerbación de la EPOC que cumplen, además, otras características adicionales (p. ej., ausencia de compromiso del nivel de consciencia, de insuficiencia cardíaca descompensada u otra condición aguda, o de necesidad de ventilación mecánica).

Todos los ensayos clínicos incluyeron pacientes con exacerbaciones de la EPOC. Cinco estudios evaluaron el ingreso hospitalario frente

al alta a un hospital a domicilio desde el departamento de urgencias, 3 estudios evaluaron el ingreso hospitalario frente al alta a domicilio después de una hospitalización inicial y en 1 estudio no se pudo determinar el entorno del alta.

Las intervenciones podían ser realizadas íntegramente por personal de enfermería<sup>3-5</sup>, por un equipo formado entre médicos y enfermería<sup>6</sup> o involucrar un equipo más amplio (además, dietistas, fisioterapeutas, etc.) y el seguimiento podía ser de 1 semana<sup>7</sup> o de hasta 8 semanas<sup>3</sup>.

Revisión sistemática  
Jeppesen et al (2012)<sup>1</sup>.

Ensayos clínicos aleatorizados  
Utens et al (2012)<sup>2</sup>, Hernández et al (2003)<sup>3</sup>, Nissen et al (2007)<sup>4</sup>, Ojoo et al (2002)<sup>5</sup>, Ricauda et al (2008)<sup>6</sup>, Nicholson et al (2001)<sup>7</sup>, Cotton et al (2000)<sup>8</sup>, Davies et al (2000)<sup>9</sup> y Skwarska et al (2000)<sup>10</sup>.

## LA HOSPITALIZACIÓN A DOMICILIO FRENTE A LA HOSPITALIZACIÓN CONVENCIONAL

|            |              |
|------------|--------------|
| Reingresos | Calidad baja |
|------------|--------------|

En el análisis conjunto de los datos (9 ensayos clínicos aleatorizados [ECA]), el tratamiento domiciliario muestra una disminución significativa en el número de personas que requirieron reingresos respecto a la hospitalización convencional (riesgo relativo [RR]: 0,78 [0,62-0,99]; 75 menos por 1.000, de 3 menos a 130 menos). Aunque

no se puede descartar la posibilidad de que el efecto sea clínicamente irrelevante.

La confianza en este resultado es baja, por la imprecisión de los resultados y las limitaciones en el diseño de los estudios (estudios abiertos).

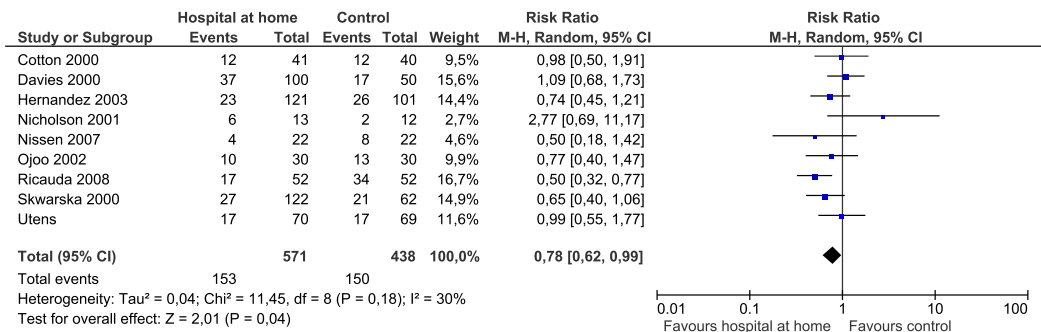

Figura 1. Resultados en relación con los reingresos.

|                                                 |              |
|-------------------------------------------------|--------------|
| Tiempo hasta el primer reingreso medido en días | Calidad baja |
|-------------------------------------------------|--------------|

En 1 estudio, la terapia domiciliaria no muestra diferencias en el tiempo transcurrido antes del primer reingreso respecto a la hospitalización convencional (diferencia media [MD]: 8 días más [3,7 días menos a 19,7 más]; 1 ECA).

La confianza en este resultado es baja debido a la imprecisión y el riesgo de sesgo presente en el diseño del estudio.

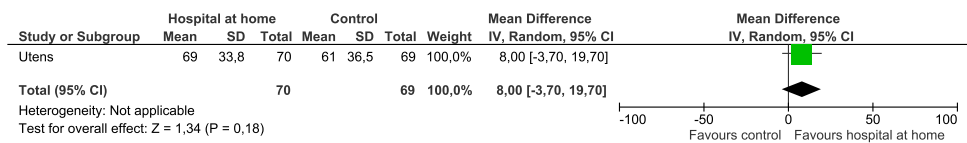

Figura 2. Resultados en relación con el tiempo hasta el primer reingreso medido en días.

Calidad de vida: puntuación total en el SGRQ

Calidad baja

El Saint George's Respiratory Questionnaire (SGRQ) arroja puntuaciones entre 0 y 100; puntuaciones más altas indican peor calidad de vida.

Un total de 3 ECA evaluaron la calidad de vida con la escala SGRQ, aunque expresaron los resultados de forma heterogénea. Un estudio solo evaluó la calidad de vida en un subgrupo de pacientes.

Los resultados muestran una mejoría de la calidad de vida (disminución de la puntuación) con ambas intervenciones, sin diferencias aparentes entre ellas. De todos modos, la confianza en los resultados es baja debido a la imprecisión de los resultados y las limitaciones en el diseño y la ejecución de los estudios.

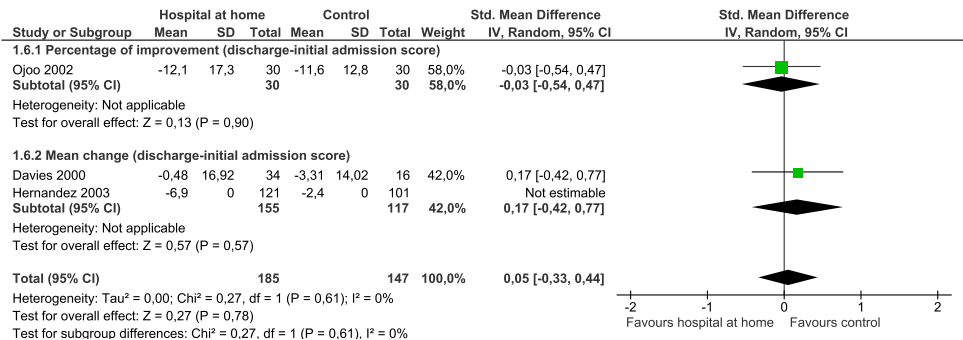

Figura 3. Resultados en relación con la puntuación total en el SGRQ.

Función pulmonar: volumen espiratorio forzado en el primer segundo

Calidad baja

En el análisis conjunto de los datos (4 ECA), la hospitalización a domicilio no muestra diferencias significativas en la función pulmonar (volumen espiratorio forzado en el primer segundo [FEV<sub>1</sub>]) respecto a la hospitalización convencional (MD: 0,01 l; intervalo de confianza [IC] del 95%, -0,06 a 0,09).

La confianza en el estimador conjunto del efecto es baja debido a la impresión y a que los resultados de los estudios individuales fueron variables.

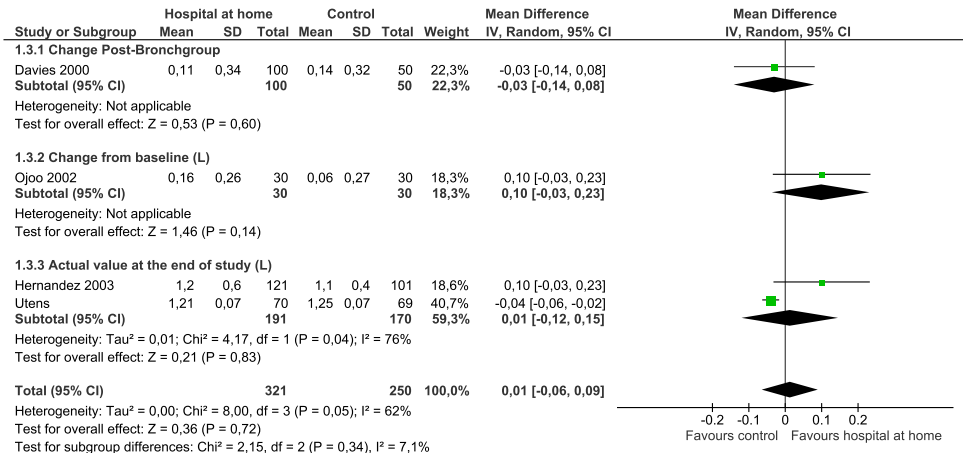

Figura 4. Resultados en relación con el volumen espiratorio forzado en el primer segundo.

Función pulmonar: capacidad vital forzada

Calidad moderada

En el análisis conjunto de los datos (2 ECA), la hospitalización a domicilio no muestra diferencias significativas en la función pulmonar (capacidad vital forzada [FVC]) respecto a la hospitalización convencional (MD: 0,14 l; IC del 95%, -0,04 a 0,33).

La confianza en el estimador conjunto del efecto es moderada debido a la imprecisión.

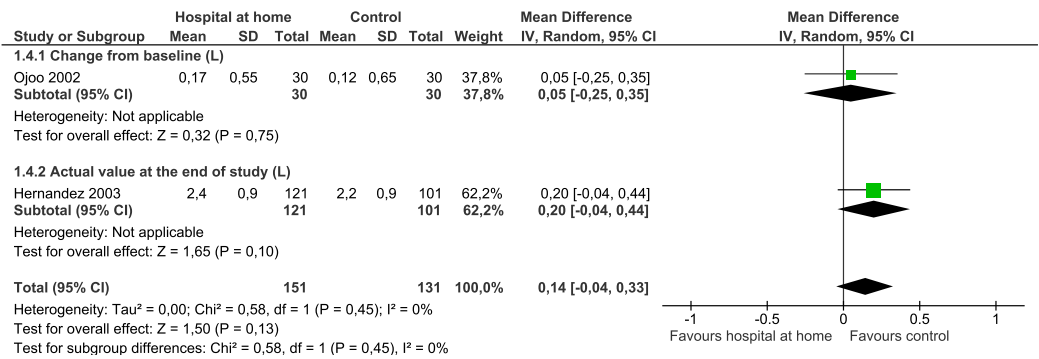

Figura 5. Resultados en relación con la capacidad vital forzada.

EFFECTOS ADVERSOS

|            |                  |
|------------|------------------|
| Mortalidad | Calidad moderada |
|------------|------------------|

En el análisis conjunto de los datos, la terapia domiciliaria no muestra diferencias en la mortalidad al compararla con la hospitalización convencional, a pesar de que se observa cierta tendencia a presentar menor mortalidad en la hospitalización domiciliaria (RR: 0,66 [0,41-1,05]; 8 ECA; 67 eventos).

La confianza en este resultado es moderada, por la imprecisión en el efecto global de la intervención.

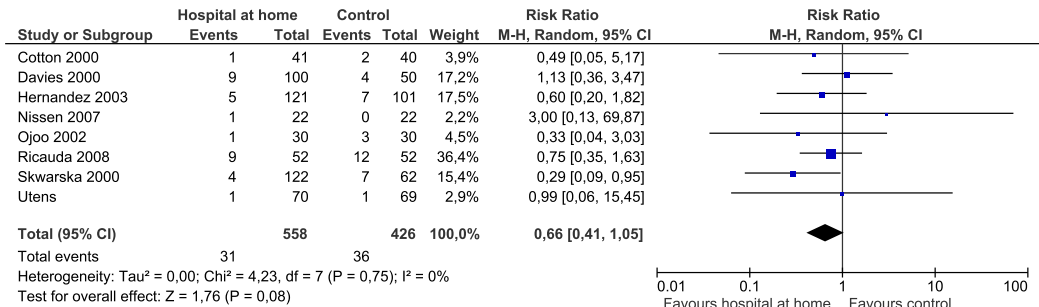

Figura 6. Resultados en relación con la mortalidad.

|                          |                     |
|--------------------------|---------------------|
| Balance riesgo/beneficio | Calidad global baja |
|--------------------------|---------------------|

La hospitalización a domicilio podría reducir el número de reingresos respecto a la hospitalización convencional, aunque la confianza en los resultados es baja y no se encuentran diferencias en otros desenlaces, como la calidad de vida, la función pulmonar o la mortalidad. Un potencial beneficio de la atención hospitalaria a domicilio sería la teórica reducción de la adquisición de infecciones nosocomiales, aunque este desenlace no ha sido evaluado en ninguno de los estudios.

Tres estudios incluyeron una evaluación de costes<sup>3,6,7</sup>. Los 3 evaluaron los costes directos de ambas intervenciones, excluyendo el impacto de las intervenciones en la duración de la estancia hospitalaria, los reingresos o las nuevas exacerbaciones. Dos estudios (1 de ellos realizado en España) mostraron un coste directo menor asociado al hospital a domicilio, mientras que un tercero no mostró diferencias en los costes directos de ambas intervenciones. Las diferencias entre las intervenciones evaluadas y los entornos asistenciales dificultan la aplicabilidad de estos resultados.

Dos de los estudios identificados evaluaron la satisfacción y las preferencias respecto a las intervenciones evaluadas. No se observaron diferencias significativas por lo que se refiere a la satisfacción

de los pacientes o cuidadores. De todos modos, tanto los pacientes como los cuidadores mostraron una mayor preferencia por la hospitalización domiciliaria.

El grupo elaborador de la guía considera clave la correcta identificación de los pacientes que más se puedan beneficiar de un programa de hospitalización a domicilio. Debido a la naturaleza de la propia intervención, se excluiría a los pacientes con exacerbaciones más graves que requieran tratamiento hospitalario (con alteraciones del nivel de consciencia, alteraciones del equilibrio ácido-base, cambios agudos en el patrón radiológico o patologías concomitantes graves) o a los que, según el criterio clínico, requieran una modificación en el tratamiento habitual que pueda realizar el propio paciente a domicilio. Los pacientes sin un soporte familiar y social adecuado tampoco serían candidatos para las estrategias de hospitalización domiciliaria.

Existe incertidumbre sobre la factibilidad de estos programas, pues su creación y su implementación dependen de otros niveles de intervención, como son la gestión y las políticas sanitarias en el ámbito local o autonómico. La organización y coordinación de los equipos

asistenciales a domicilio requiere de formación específica. Es probable que sea más difícil su implementación en áreas rurales.

El grupo elaborador no ha considerado apropiado realizar una recomendación de organización asistencial respecto a la creación de equipos de atención domiciliaria en nuestro entorno asistencial. De esta forma, en los entornos en los que ya existe la posibilidad de realizar una atención hospitalaria a domicilio, el grupo elaborador considera que los beneficios podrían superar a los inconvenientes en un grupo seleccionado de pacientes.

El grupo elaborador coincide en que, de realizarse la hospitalización domiciliaria, se realice con una aproximación conservadora, que consiste en ofrecer una estabilización hospitalaria inicial seguida de un alta temprana ligada al posterior control domiciliario. La experiencia en estos programas involucra principalmente al personal de enfermería como los protagonistas en el seguimiento domiciliario, pero con acceso a todos los recursos y/o niveles de atención cuando sea preciso.

|                        |                      |
|------------------------|----------------------|
| <b>Recomendaciones</b> | <b>Débil a favor</b> |
|------------------------|----------------------|

En los centros en los que ya se dispone de una estructura de hospitalización a domicilio, se sugiere ofrecer esta opción a los pacientes que requieran una atención hospitalaria urgente por una exacerbación de la EPOC no acidótica, tras una valoración clínica que confirme la posibilidad de su indicación y siempre que exista un adecuado soporte familiar o social en el entorno del paciente.

**Especificaciones:** la mayoría de los estudios excluyeron a los pacientes con alteraciones del nivel de consciencia, alteraciones del

equilibrio ácido-base, cambios agudos en el patrón radiológico, necesidades de ventilación mecánica invasiva y/o patologías concomitantes graves o mal controladas, como demencia, cáncer, fallo renal, diabetes o hipertensión. Sin embargo pueden existir otros factores influyentes, por lo que la decisión de realizar una hospitalización a domicilio debe ser individualizada y aceptada por los pacientes y cuidadores.

Tabla 20.1. Resumen de conclusiones

|                              | <b>Judgement</b>                     |                                               |                                                          |                                         |                         |               |                               |
|------------------------------|--------------------------------------|-----------------------------------------------|----------------------------------------------------------|-----------------------------------------|-------------------------|---------------|-------------------------------|
| <b>Desirable effects</b>     | Trivial                              | <b>Small</b>                                  | Moderate                                                 | Large                                   |                         | Varies        | Don't know                    |
| <b>Undesirable effects</b>   | Large                                | Moderate                                      | Small                                                    | <b>Trivial</b>                          |                         | Varies        | Don't know                    |
| <b>Certainty of evidence</b> | Very low                             | <b>Low</b>                                    | Moderate                                                 | High                                    |                         |               | No included studies           |
| <b>Values</b>                | Important uncertainty or variability | Possibly important uncertainty or variability | Probably no important uncertainty or variability         | No important uncertainty or variability |                         |               | No known undesirable outcomes |
| <b>Balance of effects</b>    | Favors the comparison                | Probably favors the comparison                | Does not favor either the intervention or the comparison | <b>Probably favors the intervention</b> | Favors the intervention | Varies        | Don't know                    |
| <b>Resources required</b>    | Large costs                          | Moderate costs                                | Negligible costs and savings                             | Moderate savings                        | Large savings           | <b>Varies</b> | Don't know                    |
| <b>Acceptability</b>         | No                                   | Probably no                                   | Probably yes                                             | Yes                                     |                         | Varies        | Don't know                    |
| <b>Feasibility</b>           | No                                   | Probably no                                   | Probably yes                                             | Yes                                     |                         | <b>Varies</b> | Don't know                    |

Tabla 20.2. Resumen de la evidencia de la efectividad de la hospitalización a domicilio en la EPOC

| Quality assessment                              |                   |                      |                      |              |                      |                      | N° of patients                                                                                                                                                                                                                                                   |                    | Effect                 |                                               | Quality        | Importance |
|-------------------------------------------------|-------------------|----------------------|----------------------|--------------|----------------------|----------------------|------------------------------------------------------------------------------------------------------------------------------------------------------------------------------------------------------------------------------------------------------------------|--------------------|------------------------|-----------------------------------------------|----------------|------------|
| N° of studies                                   | Study design      | Risk of bias         | Inconsistency        | Indirectness | Imprecision          | Other considerations | Hospital at home                                                                                                                                                                                                                                                 | Hospital admission | Relative (95% CI)      | Absolute (95% CI)                             |                |            |
| Hospital readmission                            |                   |                      |                      |              |                      |                      |                                                                                                                                                                                                                                                                  |                    |                        |                                               |                |            |
| 9                                               | randomised trials | serious <sup>1</sup> | not serious          | not serious  | serious <sup>2</sup> | none                 | 153/571 (26.8%)                                                                                                                                                                                                                                                  | 150/438 (34.2%)    | RR 0.78 (0.62 to 0.99) | 75 fewer per 1000 (from 3 fewer to 130 fewer) | ⊕⊕○○ LOW       | CRITICAL   |
| Mortality                                       |                   |                      |                      |              |                      |                      |                                                                                                                                                                                                                                                                  |                    |                        |                                               |                |            |
| 8                                               | randomised trials | not serious          | not serious          | not serious  | serious <sup>2</sup> | none                 | 31/558 (5.6%)                                                                                                                                                                                                                                                    | 36/426 (8.5%)      | RR 0.66 (0.41 to 1.05) | 29 fewer per 1000 (from 4 more to 50 fewer)   | ⊕⊕⊕○ MODE-RATE | CRITICAL   |
| Time to first readmission (assessed with: days) |                   |                      |                      |              |                      |                      |                                                                                                                                                                                                                                                                  |                    |                        |                                               |                |            |
| 1                                               | randomised trials | serious <sup>1</sup> | not serious          | not serious  | serious <sup>2</sup> | none                 | 70                                                                                                                                                                                                                                                               | 69                 | -                      | MD 8 days more (3.7 fewer to 19.7 more)       | ⊕⊕○○ LOW       | CRITICAL   |
| QoL - SGRQ                                      |                   |                      |                      |              |                      |                      |                                                                                                                                                                                                                                                                  |                    |                        |                                               |                |            |
| 3                                               | randomised trials | serious <sup>1</sup> | not serious          | not serious  | serious <sup>3</sup> | none                 | There were no differences between the two options in the percentage of improvement or in the mean change from baseline values for SGRQ. One trial did not report standard deviations, and one study only provided SGRQ scores for a subgroup of 50 participants. |                    |                        |                                               | ⊕⊕○○ LOW       | IMPOR-TANT |
| Lung function (FEV <sub>1</sub> )               |                   |                      |                      |              |                      |                      |                                                                                                                                                                                                                                                                  |                    |                        |                                               |                |            |
| 4                                               | randomised trials | not serious          | serious <sup>4</sup> | not serious  | serious <sup>2</sup> | none                 | 321                                                                                                                                                                                                                                                              | -                  | -                      | SMD 0.04 fewer (0.43 fewer to 0.35 more)      | ⊕⊕○○ LOW       | IMPOR-TANT |
| Lung function (FVC)                             |                   |                      |                      |              |                      |                      |                                                                                                                                                                                                                                                                  |                    |                        |                                               |                |            |
| 2                                               | randomised trials | not serious          | not serious          | not serious  | serious <sup>2</sup> | none                 | 151                                                                                                                                                                                                                                                              | 131                | -                      | MD 0.14 more (0.04 fewer to 0.33 more)        | ⊕⊕⊕○ MODE-RATE | IMPOR-TANT |

CI: Confidence interval; RR: Risk ratio; MD: Mean difference; SMD: Standardised mean difference.

<sup>1</sup> Non blinded studies that probably biased this subjective outcome.<sup>2</sup> Wide confidence intervals; the ends of the confidence interval would lead to different clinical decisions.<sup>3</sup> Pooled estimates could not be obtained due to differences in outcome reporting and lack of data in some studies. Confidence margins of the overall effect could be determined.<sup>4</sup> Wide variability among effect estimate. Pooled estimate was obtained from studies reporting final values, changes from baseline and changes after post-bronchodilator test.

## Referencias

1. \*Jeppesen E, Brurberg K, Vist G, Wedzicha J, Wright J, Greenstone M, et al. Hospital at home for acute exacerbations of chronic obstructive pulmonary disease. Cochrane Database Syst Rev. 2012;(5):CD003573.
2. \*\*Utens C, Goossens L, Smeenk F, Rutten-van Mölken M, Van Vliet M, Braken M, et al. Early assisted discharge with generic community nursing for chronic obstructive pulmonary disease exacerbations: results of a randomised controlled trial. BMJ Open. 2012;2:e001684.
3. \*\*\*\*Hernández C, Casas A, Escarrabill J, Alonso J, Puig-Junoy J, Farrero E, et al. Home hospitalisation of exacerbated chronic obstructive pulmonary disease patients. Eur Respir J. 2003;21:58-67.
4. \*\*Nissen I, Jensen MS. Nurse-supported discharge of patients with exacerbation of chronic obstructive pulmonary disease. Ugeskr Laeger. 2007;169:2220-3.
5. \*\*Ojoo JC, Moon T, McGlone S, Martin K, Gardiner ED, Greenstone MA, et al. Patients' and carers' preferences in two models of care for acute exacerbations of COPD: results of a randomised controlled trial. Thorax. 2002;57:167-9.
6. \*\*\*\*Ricauda NA, Tibaldi V, Leff B, Scarafioti C, Marinello R, Zanolchi M, et al. Substitutive "Hospital at Home" Versus Inpatient Care for Elderly Patients with Exacerbations of Chronic Obstructive Pulmonary Disease: A Prospective Randomized, Controlled Trial. J Am Geriatr Soc. 2008;56:493-500.
7. \*\*\*\*Nicholson C, Bowler S, Jackson C, Schollay D, Tweeddale M, O'Rourke P. Cost comparison of hospital and homebased treatment models for acute chronic obstructive pulmonary disease. Austral Health Rev. 2001;24:181-7.
8. \*\*Cotton MM, Bucknall CE, Dagg KD, Johnson MK, MacGregor G, Stewart C, et al. Early discharge for patients with exacerbations of chronic obstructive pulmonary disease: a randomized controlled trial. Thorax. 2000;55:902-6.
9. \*\*Davies L, Wilkinson M, Bonner S, Calverley PM, Angus RM. "Hospital at home" versus hospital care in patients with exacerbations of chronic obstructive pulmonary disease: prospective randomised controlled trial. BMJ. 2000;321:1265-8.
10. \*\*Skwarska E, Cohen G, Skwarski KM, Lamb C, Bushell D, Parker S, et al. Randomized controlled trial of supported discharge in patients with exacerbations of chronic obstructive pulmonary disease. Thorax. 2000;55:907-12.

\*Revisión sistemática.

\*\*Ensayo clínico aleatorizado.

\*\*\*Estudio de costes.



# Eficacia de la rehabilitación pulmonar temprana tras una agudización de la EPOC

## P21. Pregunta para responder:

En los pacientes con EPOC hospitalizados por exacerbación de la EPOC, ¿se recomienda la rehabilitación pulmonar temprana frente a la atención habitual?

Se identificó una revisión sistemática<sup>1</sup> (RS), que incluía 20 ensayos clínicos que asignaban de forma aleatoria un tratamiento de rehabilitación pulmonar temprana añadido a la atención habitual o solo la atención habitual a una población de pacientes hospitalizados por una agudización de la EPOC. Todos los programas de rehabilitación pulmonar incluían ejercicio físico, que se iniciaba dentro de las 3 semanas desde el inicio del tratamiento para la exacerbación de la EPOC, por lo que todos los estudios iniciaron la rehabilitación pulmonar durante la hospitalización o inmediatamente tras el alta hospitalaria.

Se excluyó un estudio porque los pacientes habían completado ya un programa de rehabilitación pulmonar previo y el ensayo evaluaba la repetición del programa<sup>2</sup>.

Se identificó un estudio adicional<sup>3</sup>, en el que se realizaba un programa de rehabilitación pulmonar a domicilio 2 meses después del alta por una exacerbación de la EPOC.

La heterogeneidad en la implementación de los programas entre los estudios fue alta. Los más comunes fueron:

- Educación para la salud y entrenamiento con ejercicios dentro de los 2 meses tras el alta hospitalaria.
- Entrenamiento en técnicas de respiración y ejercicio físico dentro de las 2 semanas tras el alta.
- Terapia con ejercicios de diferente intensidad 2 veces al día, iniciada durante la hospitalización, y ejercicios de aumento progresivo de resistencia y aeróbicos, iniciados dentro de las 48 horas desde el ingreso.

La duración de los programas fue también variable: entre 4 y 10 días<sup>4-9</sup>, 3 semanas<sup>10</sup>, 4 semanas<sup>11</sup>, 6 semanas<sup>12,13</sup>, 8 semanas<sup>3,14-16</sup>, 12 semanas<sup>2,17,18</sup>, 6 meses<sup>19,20</sup> y 12 meses<sup>21</sup>.

Por este motivo, para los subanálisis de la revisión<sup>1</sup>, los autores tuvieron en cuenta la extensión del programa de rehabilitación pulmonar según los siguientes criterios: número de sesiones de ejercicio completadas, tipo, intensidad y supervisión del entrenamiento físico y educación terapéutica ofrecida al paciente.

## RESUMEN DE RESULTADOS PRINCIPALES

**COMENTARIO:** La nueva RS de Puhan et al (2006)<sup>1</sup> es muy completa. De todas formas, los estudios tuvieron un diseño abierto. Este aspecto confiere un riesgo de sesgo en la evaluación de los desenlaces, sobre todo en aquellos con un componente subjetivo o dependientes del paciente o del evaluador, principalmente la calidad de vida o la

capacidad funcional. Hemos considerado que no afectaría a un desenlace como los reingresos, aunque puede ser discutible. Definitivamente, no confiere un riesgo de sesgo para un desenlace como la mortalidad.

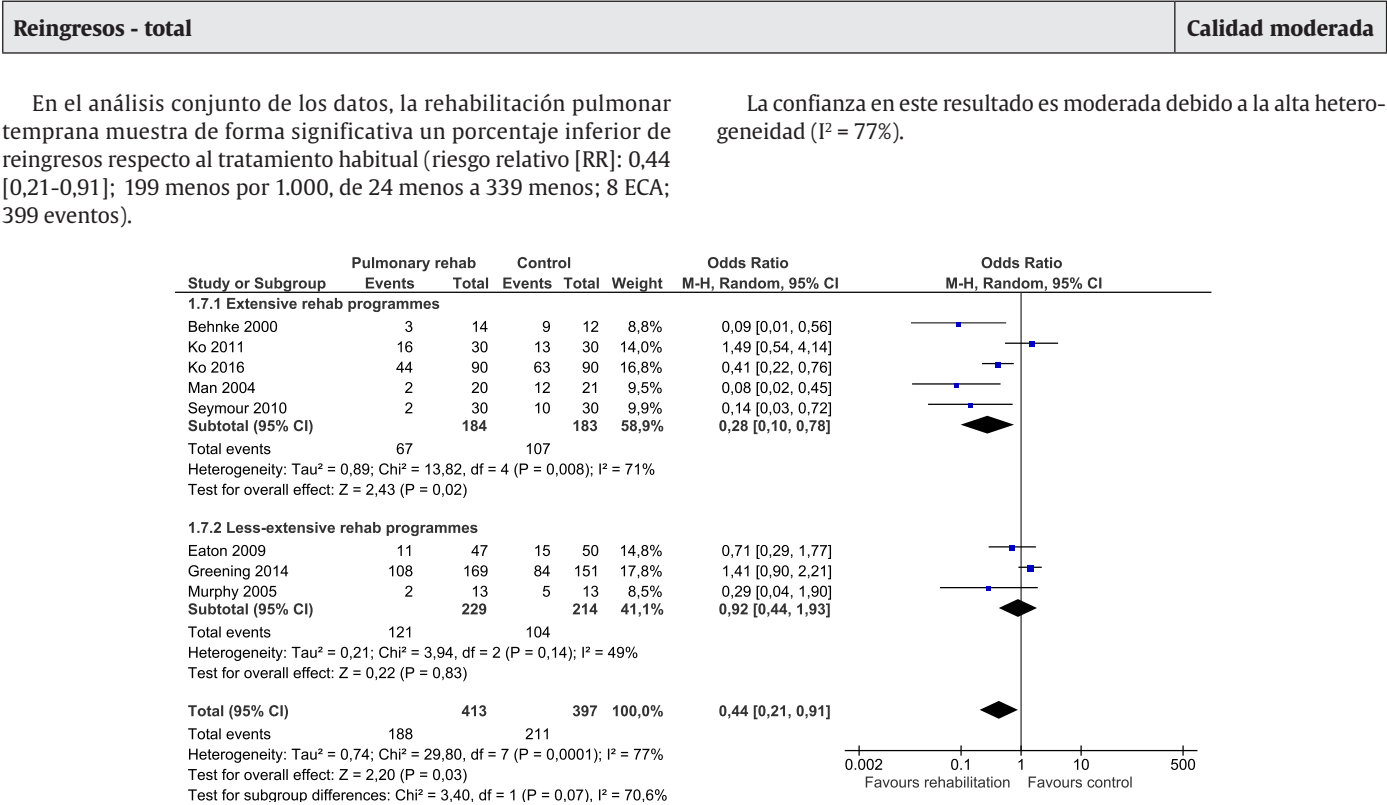

Figura 1. Resultados en relación con los reingresos - total.

|                                                          |                  |
|----------------------------------------------------------|------------------|
| Reingresos - programa extenso de rehabilitación pulmonar | Calidad moderada |
|----------------------------------------------------------|------------------|

El subanálisis de los datos de los estudios que ofrecían un programa extenso de rehabilitación pulmonar temprana muestra diferencias significativas en el porcentaje de reingresos respecto al tratamiento habitual (RR: 0,28 [0,10-0,78]; 302 menos por 1.000, de 61 menos a 461 menos; 5 ECA; 174 eventos).

La confianza en este resultado es moderada, por la elevada heterogeneidad ( $I^2 = 71\%$ ).

|                                                                |                  |
|----------------------------------------------------------------|------------------|
| Reingresos - programa menos extenso de rehabilitación pulmonar | Calidad moderada |
|----------------------------------------------------------------|------------------|

El subanálisis de los datos de los estudios que ofrecieron un programa menos extenso de rehabilitación pulmonar temprana no muestra efecto en el porcentaje de reingresos respecto al tratamiento habitual (RR: 0,92 [0,44-1,93]; 3 ECA; 225 eventos).

La confianza en este resultado es moderada debido a la imprecisión de los resultados.

|                                          |              |
|------------------------------------------|--------------|
| Calidad de vida: puntuación SGRQ - total | Calidad baja |
|------------------------------------------|--------------|

En el análisis conjunto de los datos, la rehabilitación pulmonar temprana muestra una reducción significativa en la puntuación de la escala de calidad de vida SGRQ (Saint George's Respiratory Questionnaire) respecto al tratamiento habitual, es decir, una mejoría en la calidad de vida medida por esta escala (diferencia media [MD]: 7,80 puntos menos [de 12,12 menos a 3,47 menos]; 8 ECA; 846 pacientes).

La confianza en este resultado es baja debido a la alta heterogeneidad ( $I^2 = 64\%$ ) y al riesgo de sesgo, por ser estudios abiertos que evalúan un desenlace subjetivo.

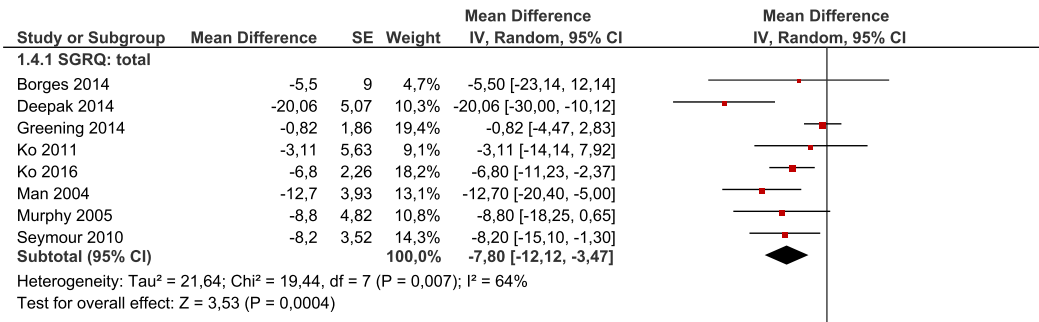

Figura 2. Resultados en relación con la puntuación SGRQ - total.

|                                                         |              |
|---------------------------------------------------------|--------------|
| Capacidad funcional: test de la marcha de 6 min - total | Calidad baja |
|---------------------------------------------------------|--------------|

En el análisis conjunto de los datos, la rehabilitación pulmonar temprana muestra un incremento significativo en el test de la marcha de 6 min respecto al tratamiento habitual (MD: 62,38 m más [de 38,45 m más a 86,31 m más]; 13 ECA; 819 pacientes).

La confianza en este resultado es baja, por la alta heterogeneidad ( $I^2 = 87\%$ ) y el riesgo de sesgo, por ser estudios abiertos que evalúan un desenlace subjetivo.

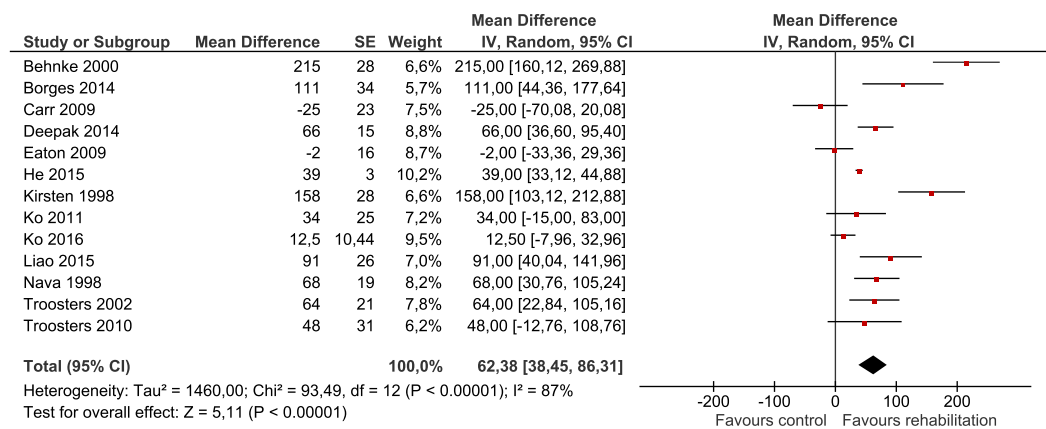

Figura 3. Resultados en relación con el test de la marcha de 6 min – total.

|                                                                                               |              |
|-----------------------------------------------------------------------------------------------|--------------|
| Capacidad funcional: test de la marcha de 6 min - programa extenso de rehabilitación pulmonar | Calidad baja |
|-----------------------------------------------------------------------------------------------|--------------|

En el subanálisis de los datos de los estudios que ofrecieron un programa extenso de rehabilitación pulmonar temprana, se muestra un incremento significativo en el test de la marcha de 6 min respecto al tratamiento habitual: MD 65,50 metros más (de 31,71 m más a 99,30 m más), 6 ECA.

La confianza en este resultado es baja por la alta heterogeneidad ( $I^2 = 90\%$ ) y el riesgo de sesgo por ser estudios abiertos que evalúan un desenlace subjetivo.

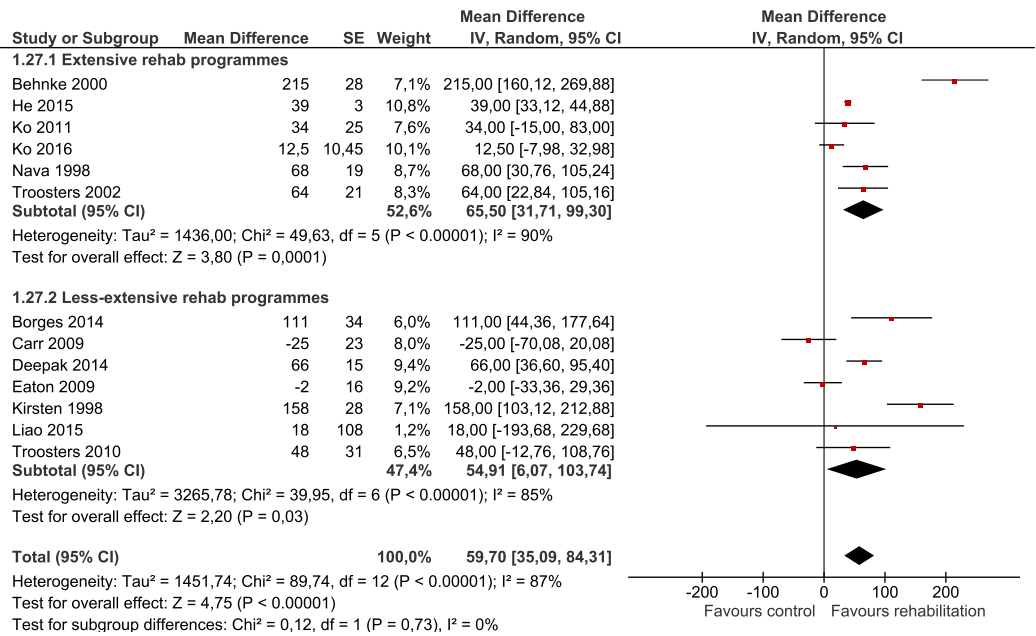

Figura 4. Resultados en relación con el test de la marcha de 6 min - programa extenso de rehabilitación pulmonar.

|                                                                                                         |              |
|---------------------------------------------------------------------------------------------------------|--------------|
| Capacidad funcional: test de la marcha de 6 minutos - programa menos extenso de rehabilitación pulmonar | Calidad baja |
|---------------------------------------------------------------------------------------------------------|--------------|

El subanálisis de los datos de los estudios que ofrecieron un programa menos extenso de rehabilitación pulmonar temprana muestra un incremento significativo en el test de la marcha de 6 min respecto al tratamiento habitual (MD: 54,91 m más [de 6,07 m más a 103,74 m más]; 7 ECA) (v. figura anterior).

La confianza en este resultado es baja, por la alta heterogeneidad ( $I^2 = 85\%$ ) y el riesgo de sesgo, por ser estudios abiertos que evalúan un desenlace subjetivo.

EFFECTOS ADVERSOS

|                    |                  |
|--------------------|------------------|
| Mortalidad - total | Calidad moderada |
|--------------------|------------------|

En el análisis conjunto de los datos, la rehabilitación pulmonar temprana muestra una disminución no significativa en la mortalidad respecto al tratamiento habitual (RR: 0,68 [0,28-1,67]; 6 ECA; 110 eventos).

La confianza en este resultado es moderada, por la imprecisión de los resultados. Aunque los resultados fueron variables entre los estu-

dios, esto probablemente se explique por las diferentes características de los programas de rehabilitación. El número de eventos es demasiado escaso para obtener conclusiones firmes sobre el efecto de las intervenciones.

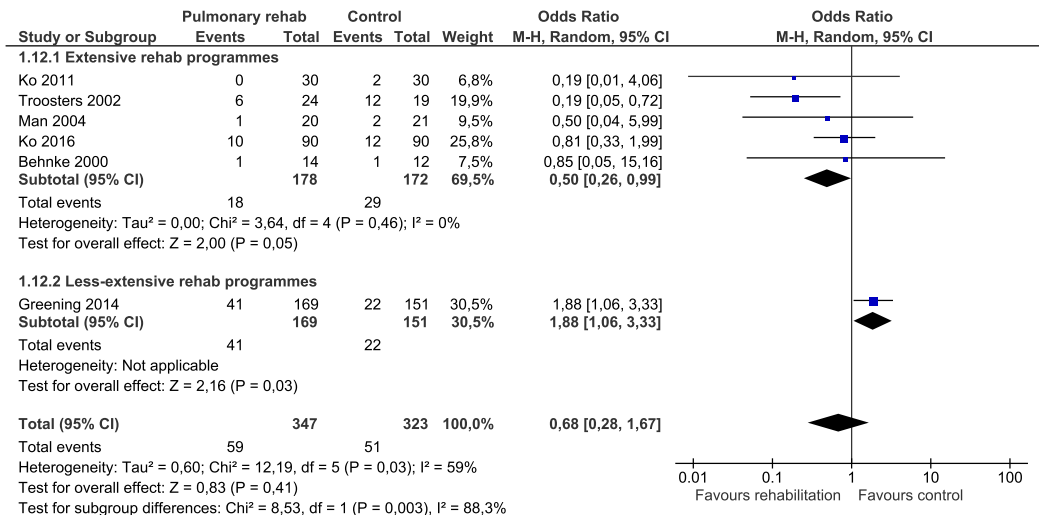

Figura 5. Resultados en relación con la mortalidad - total.

|                                                          |                  |
|----------------------------------------------------------|------------------|
| Mortalidad - programa extenso de rehabilitación pulmonar | Calidad moderada |
|----------------------------------------------------------|------------------|

El subanálisis de los datos de los estudios que ofrecieron un programa de rehabilitación pulmonar temprana muestra una disminución, marginalmente significativa, de la mortalidad respecto al tratamiento habitual (RR: 0,50 [0,26-0,99]; 5 ECA; 47 eventos).

La confianza en este resultado es moderada, por la imprecisión de los resultados.

|                                                                |                  |
|----------------------------------------------------------------|------------------|
| Mortalidad - programa menos extenso de rehabilitación pulmonar | Calidad moderada |
|----------------------------------------------------------------|------------------|

El subanálisis de los datos del único estudio que ofreció un programa menos extenso de rehabilitación pulmonar temprana muestra un aumento en la mortalidad en comparación con el tratamiento habitual (RR: 1,88 [1,06-3,33]; 1 ECA; 63 eventos).

La confianza en este resultado es moderada, por la imprecisión de los resultados.

|                          |                     |
|--------------------------|---------------------|
| Balance riesgo/beneficio | Calidad global baja |
|--------------------------|---------------------|

En los pacientes hospitalizados por una agudización por EPOC, los programas de rehabilitación temprana podrían reducir los reingresos hospitalarios y mejorar la calidad de vida y la capacidad de ejercicio, aunque la extensión de los programas influyó la magnitud de los efectos observados.

Se realizaron análisis de subgrupos según la extensión del programa de rehabilitación pulmonar. Las principales diferencias se encuentran en el efecto de los programas más extensos en los reingresos y la mortalidad. La influencia de la extensión del programa de rehabilitación en la calidad de vida o en la capacidad de ejercicio fue escasa.

Los resultados muestran que los programas más extensos reducen de forma significativa los reingresos hospitalarios y se asocian a una menor mortalidad, aunque no se puede descartar que se trate de un efecto espurio debido al escaso número de eventos. Por el contrario, los programas menos extensos no presentan diferencias en relación con un control respecto a los reingresos y se asocian a un incremento de la mortalidad, aunque de nuevo el escaso número de eventos de un único estudio no permite obtener conclusiones firmes sobre este efecto.

Aunque no se han evaluado específicamente en los diferentes ensayos clínicos, el grupo considera que, de forma general, los progra-

mas de rehabilitación no están asociados a efectos adversos específicos o frecuentes.

La confianza global en estos resultados es baja debido, principalmente, a la variabilidad de los resultados y al potencial sesgo de los estudios abiertos en desenlaces objetivos como la calidad de vida o la capacidad funcional, considerados como críticos.

No se han identificado estudios de coste-efectividad. Los costes relacionados con la implementación de estos programas pueden ser importantes. El área geográfica podría ser un factor importante que se tuviera que considerar en la valoración y los costes, que podrían ser superiores en áreas no urbanas. Las limitaciones en la implementación de los programas de rehabilitación respiratoria después de una exacerbación por EPOC, principalmente en zonas no urbanas, influyen

cieron también la recomendación. La implementación de estos programas depende de la gestión y la organización de cada sistema sanitario.

Los beneficios de implantar programas de rehabilitación más extensos en los pacientes hospitalizados por una agudización por EPOC respecto a una reducción de los reingresos y un potencial beneficio sobre la calidad de vida o la capacidad de ejercicio podrían superar los potenciales inconvenientes derivados de la implantación o el uso de recursos. El efecto sobre la mortalidad requiere confirmarse en un grupo de población más amplio.

Por el contrario, los programas menos extensos no parecen asociarse a unos beneficios sustantivos.

|                 |               |
|-----------------|---------------|
| Recomendaciones | Débil a favor |
|-----------------|---------------|

Se sugiere iniciar un programa de rehabilitación respiratoria tras el alta en los pacientes que han sido hospitalizados por una exacerbación de la EPOC.

**Especificaciones:** el equipo asistencial debe valorar la disponibilidad de programas de rehabilitación pulmonar en su entorno sanitario y si es factible que el paciente los pueda cumplir correctamente. Estos programas deben ser extensos.

Tabla 21.1. Resumen de conclusiones

|                       | Judgement                            |                                               |                                                          |                                         |                         |        |                               |
|-----------------------|--------------------------------------|-----------------------------------------------|----------------------------------------------------------|-----------------------------------------|-------------------------|--------|-------------------------------|
| Desirable effects     | Trivial                              | Small                                         | Moderate                                                 | Large                                   |                         | Varies | Don't know                    |
| Undesirable effects   | Large                                | Moderate                                      | Small                                                    | Trivial                                 |                         | Varies | Don't know                    |
| Certainty of evidence | Very low                             | Low                                           | Moderate                                                 | High                                    |                         |        | No included studies           |
| Values                | Important uncertainty or variability | Possibly important uncertainty or variability | Probably no important uncertainty or variability         | No important uncertainty or variability |                         |        | No known undesirable outcomes |
| Balance of effects    | Favors the comparison                | Probably favors the comparison                | Does not favor either the intervention or the comparison | Probably favors the intervention        | Favors the intervention | Varies | Don't know                    |
| Resources required    | Large costs                          | Moderate costs                                | Negligible costs and savings                             | Moderate savings                        | Large savings           | Varies | Don't know                    |
| Acceptability         | No                                   | Probably no                                   | Probably yes                                             | Yes                                     |                         | Varies | Don't know                    |
| Feasibility           | No                                   | Probably no                                   | Probably yes                                             | Yes                                     |                         | Varies | Don't know                    |

Tabla 21.2. Resumen de la evidencia de la efectividad de la rehabilitación temprana tras una agudización de la EPOC

| Quality assessment                                                                                             |                    |              |                      |              |             |                      | N° of patients  |                 | Effect                 |                                                 | Quality        | Importance |
|----------------------------------------------------------------------------------------------------------------|--------------------|--------------|----------------------|--------------|-------------|----------------------|-----------------|-----------------|------------------------|-------------------------------------------------|----------------|------------|
| N° of studies                                                                                                  | Study design       | Risk of bias | Inconsistency        | Indirectness | Imprecision | Other considerations | Rehabilitation  | Control         | Relative (95% CI)      | Absolute (95% CI)                               |                |            |
| Hospital readmission (to end of follow-up)                                                                     |                    |              |                      |              |             |                      |                 |                 |                        |                                                 |                |            |
| 8                                                                                                              | ran-domised trials | not serious  | serious <sup>1</sup> | not serious  | not serious | none                 | 188/413 (45.5%) | 211/397 (53.1%) | OR 0.44 (0.21 to 0.91) | 199 fewer per 1000 (from 24 fewer to 339 fewer) | ⊕⊕⊕○ MODE-RATE | CRITICAL   |
| Subgroup analysis hospital readmission: extensiveness of rehabilitation programme - Extensive rehab programmes |                    |              |                      |              |             |                      |                 |                 |                        |                                                 |                |            |
| 5                                                                                                              | ran-domised trials | not serious  | serious <sup>1</sup> | not serious  | not serious | none                 | 67/184 (36.4%)  | 107/183 (58.5%) | OR 0.28 (0.10 to 0.78) | 302 fewer per 1000 (from 61 fewer to 461 fewer) | ⊕⊕⊕○ MODE-RATE |            |

Tabla 21.2. Resumen de la evidencia de la efectividad de la rehabilitación temprana tras una agudización de la EPOC (cont.)

| Quality assessment                                                                                                   |                    |                      |                          |              |                          |                      | N° of patients  |                 | Effect                 |                                                | Quality        | Importance |
|----------------------------------------------------------------------------------------------------------------------|--------------------|----------------------|--------------------------|--------------|--------------------------|----------------------|-----------------|-----------------|------------------------|------------------------------------------------|----------------|------------|
| N° of studies                                                                                                        | Study design       | Risk of bias         | Inconsistency            | Indirectness | Imprecision              | Other considerations | Rehabilitation  | Control         | Relative (95% CI)      | Absolute (95% CI)                              |                |            |
| Subgroup analysis hospital readmission: extensiveness of rehabilitation programme - Less-extensive rehab programmes  |                    |                      |                          |              |                          |                      |                 |                 |                        |                                                |                |            |
| 3                                                                                                                    | ran-domised trials | not serious          | not serious <sup>2</sup> | not serious  | serious <sup>3</sup>     | none                 | 121/229 (52.8%) | 104/214 (48.6%) | OR 0.92 (0.44 to 1.93) | 21 fewer per 1000 (from 160 more to 192 fewer) | ⊕⊕⊕○ MODE-RATE |            |
| Health-related quality of life: St George's Respiratory Questionnaire - SGRQ: total                                  |                    |                      |                          |              |                          |                      |                 |                 |                        |                                                |                |            |
| 8                                                                                                                    | ran-domised trials | serious <sup>4</sup> | serious <sup>1</sup>     | not serious  | not serious              | none                 |                 |                 | -                      | MD 7.8 lower (12.12 lower to 3.47 lower)       | ⊕⊕○○ LOW       | CRITICAL   |
| Change from baseline in 6-minute walking test                                                                        |                    |                      |                          |              |                          |                      |                 |                 |                        |                                                |                |            |
| 13                                                                                                                   | ran-domised trials | serious <sup>4</sup> | serious <sup>1</sup>     | not serious  | not serious <sup>2</sup> | none                 |                 |                 | -                      | MD 62.38 higher (38.45 higher to 86.31 higher) | ⊕⊕○○ LOW       | CRITICAL   |
| Subgroup analysis 6-minute walking test: extensiveness of rehabilitation programme - Extensive rehab programmes      |                    |                      |                          |              |                          |                      |                 |                 |                        |                                                |                |            |
| 6                                                                                                                    | ran-domised trials | serious <sup>4</sup> | serious <sup>1</sup>     | not serious  | not serious              | none                 |                 |                 | -                      | MD 65.5 higher (31.71 higher to 99.3 higher)   | ⊕⊕○○ LOW       |            |
| Subgroup analysis 6-minute walking test: extensiveness of rehabilitation programme - Less-extensive rehab programmes |                    |                      |                          |              |                          |                      |                 |                 |                        |                                                |                |            |
| 7                                                                                                                    | ran-domised trials | serious <sup>4</sup> | serious <sup>1</sup>     | not serious  | not serious              | none                 |                 |                 | -                      | MD 54.91 higher (6.07 higher to 103.74 higher) | ⊕⊕○○ LOW       |            |
| Mortality                                                                                                            |                    |                      |                          |              |                          |                      |                 |                 |                        |                                                |                |            |
| 6                                                                                                                    | ran-domised trials | not serious          | not serious              | not serious  | serious <sup>3</sup>     | none                 | 59/347 (17.0%)  | 51/323 (15.8%)  | OR 0.68 (0.28 to 1.67) | 45 fewer per 1000 (from 81 more to 108 fewer)  | ⊕⊕⊕○ MODE-RATE | CRITICAL   |
| Subgroup analysis mortality: extensiveness of rehabilitation programme - Extensive rehab programmes                  |                    |                      |                          |              |                          |                      |                 |                 |                        |                                                |                |            |
| 5                                                                                                                    | ran-domised trials | not serious          | not serious              | not serious  | serious <sup>5</sup>     | none                 | 18/178 (10.1%)  | 29/172 (16.9%)  | OR 0.50 (0.26 to 0.99) | 77 fewer per 1000 (from 1 fewer to 119 fewer)  | ⊕⊕⊕○ MODE-RATE |            |
| Subgroup analysis mortality: extensiveness of rehabilitation programme - Less-extensive rehab programmes             |                    |                      |                          |              |                          |                      |                 |                 |                        |                                                |                |            |
| 1                                                                                                                    | ran-domised trials | not serious          | not serious              | not serious  | serious <sup>5</sup>     | none                 | 41/169 (24.3%)  | 22/151 (14.6%)  | OR 1.88 (1.06 to 3.33) | 97 more per 1000 (from 7 more to 217 more)     | ⊕⊕⊕○ MODE-RATE |            |

CI: Confidence interval; OR: Odds ratio; MD: Mean difference.

<sup>1</sup> High variability among estimates of effect.<sup>2</sup> No explanation was provided.<sup>3</sup> 95% CI provides a meaningful benefit or harm.<sup>4</sup> Not blinding of intervention probably introduce bias in the effect estimate of this subjective outcome.<sup>5</sup> Low number of events.

## Referencias

1. \*Puhan MA, Gimeno-Santos E, Scharplatz M, Troosters T, Walters EH, Steurer J. Pulmonary rehabilitation following exacerbations of chronic obstructive pulmonary disease. *Cochrane Database Syst Rev*. 2016;(12):CD005305.
2. \*\*Carr SJ, Hill K, Brooks D, Goldstein RS. Pulmonary rehabilitation after acute exacerbation of chronic obstructive pulmonary disease in patients who previously completed a pulmonary rehabilitation program. *J Cardiopulm Rehabil Prev*. 2009;29:318-24.
3. \*\*Ghanem M, Elaali EA, Mehany M, Tolba K. Home-based pulmonary rehabilitation program: Effect on exercise tolerance and quality of life in chronic obstructive pulmonary disease patients. *Ann Thorac Med*. 2010;5:18-25.
4. \*\*Kirsten DK, Taube C, Lehnigk B, Jorres RA, Magnussen H. Exercise training improves recovery in patients with COPD after an acute exacerbation. *Respir Med*. 1998;92:1191-8.
5. \*\*He M, Yu S, Wang L, Lv H, Qiu Z. Efficiency and safety of pulmonary rehabilitation in acute exacerbation of chronic obstructive pulmonary disease. *Med Sci Monit*. 2015;21:806-12.
6. \*\*Liao LY, Chen KM, Chung WS, Chien JY. Efficacy of a respiratory rehabilitation exercise training package in hospitalized elderly patients with acute exacerbation of COPD: a randomized control trial. *Int J Chron Obstruct Pulmon Dis*. 2015;10:1703-9.
7. \*\*Tang CY, Blackstock FC, Clarence M, Taylor NF. Early rehabilitation exercise program for inpatients during acute exacerbation of chronic obstructive pulmonary disease: a randomized controlled trial. *J Cardiopulm Rehabil Prev*. 2012;32:163-9.
8. \*\*Torres-Sánchez I, Valenza MC, Sáez-Roca G, Cabrera-Martos I, López-Torres I, Rodríguez-Torres J. Results of a multimodal program during hospitalization in obese COPD exacerbated patients. *COPD*. 2016;13:19-25.
9. \*\*Troosters T, Probst VS, Crul T, Pitta F, Gayan-Ramirez G, Decramer M, et al. Resistance training prevents deterioration in quadriceps muscle function during acute exacerbations of chronic obstructive pulmonary disease. *Am J Respir Crit Care Med*. 2010;181:1072-7.
10. \*\*Nava S. Rehabilitation of patients admitted to a respiratory intensive care unit. *Arch Phys Med Rehabil*. 1998;79:849-54.
11. \*\*Borges RC, Carvalho CR. Impact of resistance training in chronic obstructive pulmonary disease patients during periods of acute exacerbation. *Arch Phys Med Rehabil*. 2014;95:1638-45.
12. \*\*Murphy N, Bell C, Costello RW. Extending a home from hospital care programme for COPD exacerbations to include pulmonary rehabilitation. *Respir Med*. 2005;99:1297-302.
13. \*\*Greening NJ, Williams JE, Hussain SF, Harvey-Dunstan TC, Bankart MJ, Chaplin EJ, et al. An early rehabilitation intervention to enhance recovery during hospital admission for an exacerbation of chronic respiratory disease: randomised controlled trial. *BMJ*. 2014;349:g4315.
14. \*\*Eaton T, Young P, Fergusson W, Moodie L, Zeng I, O'Kane F, et al. Does early pulmonary rehabilitation reduce acute healthcare utilization in COPD patients admitted with an exacerbation? A randomized controlled study. *Respirology*. 2009;14:230-8.
15. \*\*Seymour JM, Moore L, Jolley CJ, Ward K, Creasey J, Steier JS, et al. Outpatient pulmonary rehabilitation following acute exacerbations of COPD. *Thorax*. 2010;65:423-8.
16. \*\*Ko FW, Dai DL, Ngai J, Tung A, Ng S, Lai K, et al. Effect of early pulmonary rehabilitation on health care utilization and health status in patients hospitalized with acute exacerbations of COPD. *Respirology*. 2011;16:617-24.
17. \*\*Man WD, Polkey MI, Donaldson N, Gray BJ, Moxham J. Community pulmonary rehabilitation after hospitalisation for acute exacerbations of chronic obstructive pulmonary disease: randomised controlled study. *BMJ*. 2004;329:1209.
18. \*\*Deepak TH, Mohapatra PR, Janmeja AK, Sood P, Gupta M. Outcome of pulmonary rehabilitation in patients after acute exacerbation of chronic obstructive pulmonary disease. *Indian J Chest Dis Allied Sci*. 2014;56:7-12.
19. \*\*Behnke M, Taube C, Kirsten D, Lehnigk B, Jorres RA, Magnussen H. Home-based exercise is capable of preserving hospital-based improvements in severe chronic obstructive pulmonary disease. *Respir Med*. 2000;94:1184-91.
20. \*\*Troosters T, Gosselink R, De Paepe K, Decramer M. Pulmonary rehabilitation improves survival in COPD patients with a recent severe acute exacerbation. *Am J Respir Crit Care Med*. 2002;165:A16.
21. \*\*Ko F, Cheung NK, Rainer TH, Lum C, Wong I, Hui D. Comprehensive care programme for patients with chronic obstructive pulmonary disease: a randomized controlled trial. *Thorax*. 2017;72:122-8.

\*Revisión sistemática.

\*\*Ensayo clínico.



# Eficacia de la ventilación no invasiva en la agudización grave de la EPOC

## P22. Pregunta para responder:

En los pacientes hospitalizados con una exacerbación de la EPOC, ¿se recomienda el uso de la ventilación no invasiva frente a la atención habitual?

Se identificó una revisión sistemática que incluye 14 ensayos clínicos aleatorizados (ECA) y que evalúa los efectos de la ventilación no invasiva (VNI) en pacientes con insuficiencia respiratoria aguda debido a una exacerbación de la EPOC. Posteriormente se identificaron 7 estudios adicionales relevantes.

Todos los estudios incluyeron pacientes hospitalizados con insuficiencia respiratoria secundaria a una exacerbación de la EPOC. En la

mayoría de los estudios, los pacientes tenían una insuficiencia respiratoria aguda o una agudización de una insuficiencia respiratoria crónica hipercápnica confirmadas. Pocos estudios no especificaron si la insuficiencia respiratoria era hipercápnica.

La mayoría de los estudios comparan el tratamiento habitual más la VNI frente al tratamiento habitual, aunque algunos asignaron pacientes a la atención habitual con VNI o a la atención habitual más VNI subterapéutica (*sham* NIV).

Debido a la naturaleza de la intervención, la mayoría de los estudios no realizaron cegamiento en pacientes, médicos o evaluadores<sup>1-8</sup>.

## LA VENTILACIÓN NO INVASIVA FRENTE AL TRATAMIENTO HABITUAL

### Necesidad de intubación

Calidad moderada

En el análisis conjunto de los datos (20 ECA, 285 eventos), la ventilación mecánica no invasiva muestra un porcentaje significativamente inferior de pacientes que requirieron intubación respecto al tratamiento habitual (riesgo relativo [RR]: 0,43 [0,35-0,53]; 174 menos por

1.000, de 144 menos a 199 menos; número necesario de pacientes que tratar [NNT]: 6 [5-8]).

La confianza en este resultado es moderada, por el riesgo de sesgo presente en el diseño de los estudios.

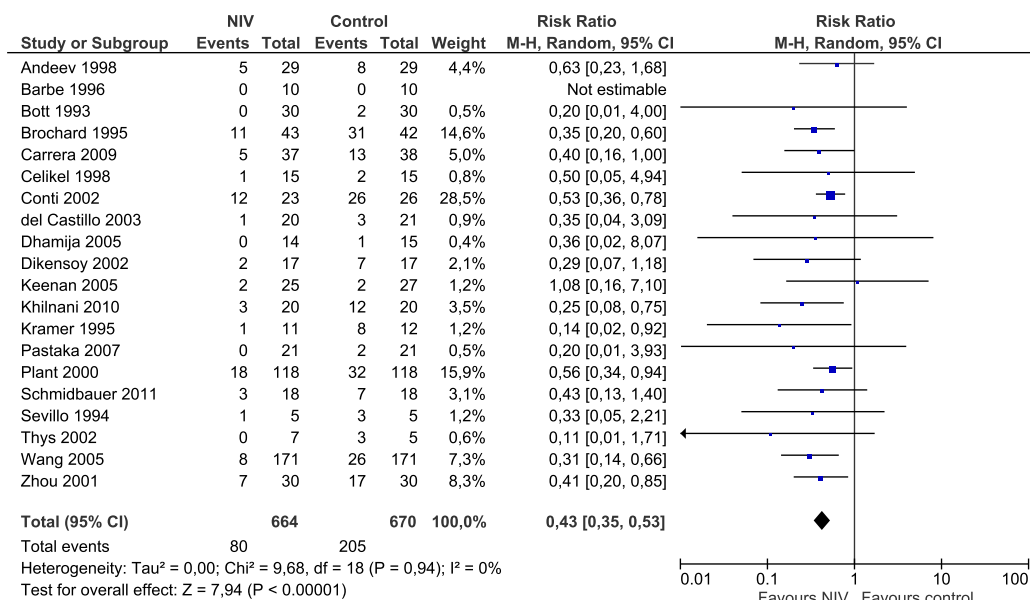

Figura 1. Resultados en relación con la necesidad de intubación.

### Duración de la estancia hospitalaria

Calidad baja

En el análisis conjunto de los datos (15 ECA, 1.159 pacientes), la ventilación mecánica no invasiva muestra una disminución significativa en la estancia hospitalaria respecto al tratamiento habitual (diferencia media [MD]: 2,88 días menos [de 4,59 menos a 1,17 menos]).

La confianza en este resultado es baja, por la alta heterogeneidad (I<sup>2</sup> = 82) y el riesgo de sesgo presente en el diseño de los estudios.

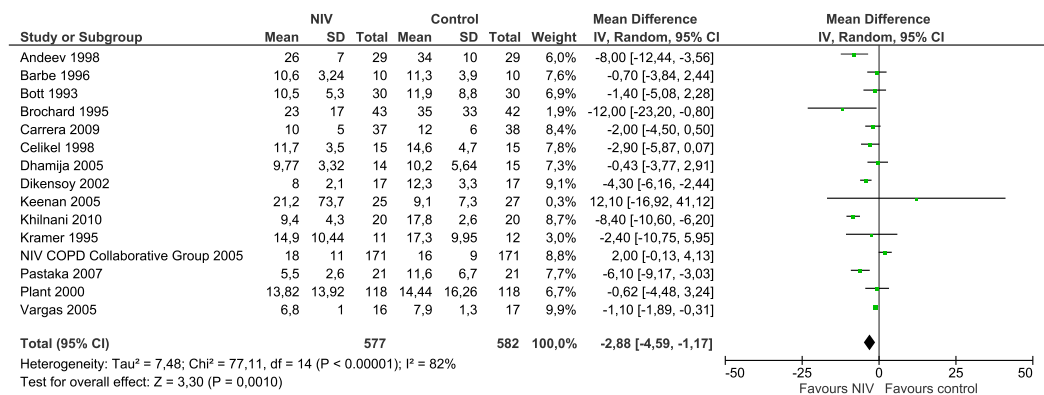

Figura 2. Resultados en relación con la duración de la estancia hospitalaria.

**Duración de la estancia en la unidad de cuidados intensivos**

Calidad baja

En el análisis conjunto de los datos (3 ECA), la ventilación mecánica no invasiva disminuye la estancia en la unidad de cuidados intensivos (UCI) respecto al tratamiento habitual, aunque la diferencia podría ser nula (MD: 4,99 días menos [de 9,99 menos a 0]).

La confianza en este resultado es baja, por el riesgo de sesgo presente en el diseño de los estudios y por la imprecisión en el efecto global de la intervención, que incluye la posibilidad de no encontrar diferencias respecto a la intervención habitual.

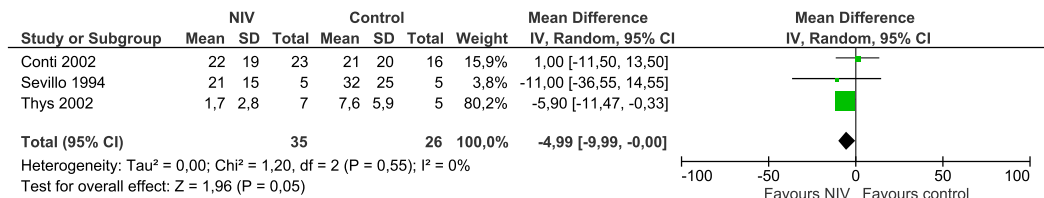

Figura 3. Resultados en relación con la duración de la estancia en la unidad de cuidados intensivos.

**EFFECTOS ADVERSOS**

**Complicaciones del tratamiento**

Calidad moderada

En el análisis conjunto de los datos (5 ECA, 82 eventos), la terapia con VNI disminuye el número de complicaciones del tratamiento respecto a la terapia habitual (RR: 0,39 [de 0,26 a 0,59]; 256 menos por 1.000, de 172 menos a 310 menos; NNT: 4 [3-7]).

La confianza en este resultado es moderada, por el riesgo de sesgo presente en el diseño de los estudios.

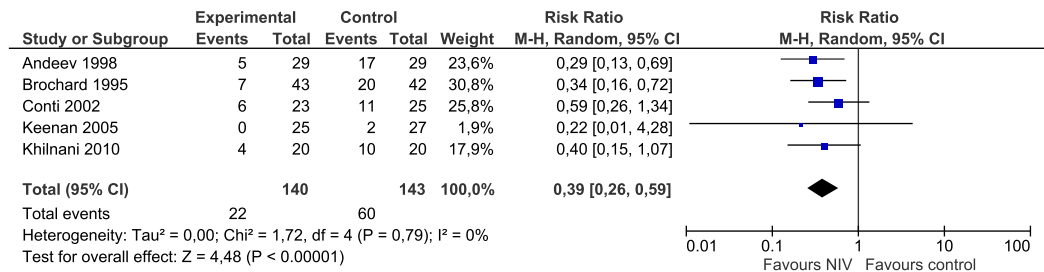

Figura 4. Resultados en relación con las complicaciones del tratamiento.

**Mortalidad**

**Calidad alta**

En el análisis conjunto de los datos (16 ECA, 122 eventos), la terapia con VNI muestra una reducción significativa en la mortalidad respecto a la terapia habitual (RR: 0,54 [0,38-0,76]; 64 menos por 1.000, de 33 menos a 86 menos; NNT: 15 [10-31]).

La confianza en este resultado es alta.

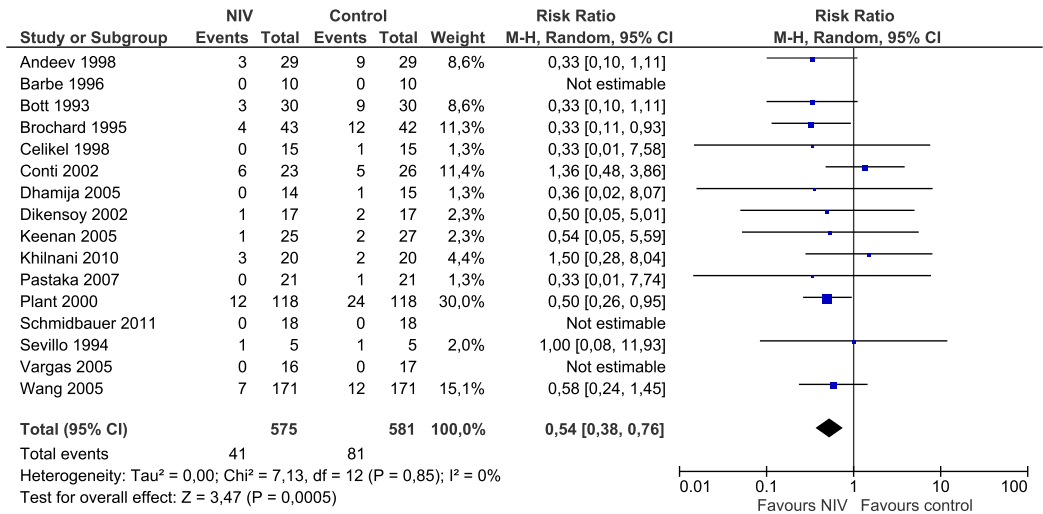

**Figura 5.** Resultados en relación con la mortalidad.

**Balance riesgo/beneficio**

**Calidad global moderada**

Instaurar la ventilación mecánica no invasiva (VMNI) en pacientes hospitalizados con fallo respiratorio agudo hipercápnico disminuye la mortalidad, la necesidad de intubación y las complicaciones del tratamiento respecto al tratamiento habitual sin soporte ventilatorio. También disminuye la estancia hospitalaria y la estancia en la UCI.

La confianza global en esta evidencia es moderada.

No se han identificado estudios de costes, pero se considera que la intervención puede ser coste-efectiva, por la disminución en las estancias hospitalarias y la reducción de la necesidad de intubación, que es un procedimiento asociado a otras complicaciones.

Uno de los objetivos de la VMNI es mejorar y estabilizar el intercambio de gases. El soporte ventilatorio instaurado a tiempo y de forma adecuada previsiblemente mejora los resultados clínicos de los pacientes hospitalizados por una agudización por EPOC que cursen con insuficiencia respiratoria hipercápnica.

Para asegurar la eficacia de esta intervención, los factores que se deben considerar son el cumplimiento de los requisitos técnicos, que se administren los volúmenes adecuados y que el personal que brinde esta atención tenga suficiente experiencia.

También se debe estar atento ante cualquier cambio gasométrico o clínico del paciente que requiera utilizar el siguiente escalón, que es la ventilación mecánica invasiva (VMI). El no controlar adecuadamente estos factores podría retrasar la instauración de una VMI en situaciones en las que la indicación de instaurarla sea clara.

El balance riesgo/beneficio se inclina a favor de recomendar esta intervención, por el beneficio clínico potencial y la poca probabilidad de efectos adversos asociados a su utilización.

**Recomendaciones**

**Fuerte a favor**

Se recomienda iniciar la VNI en pacientes con EPOC que cursan con insuficiencia respiratoria hipercápnica y acidosis respiratoria moderada, a pesar de un tratamiento médico óptimo.

*Especificaciones:*

El grupo elaborador considera razonable definir insuficiencia respiratoria con hipercapnia si la PaCO<sub>2</sub> > 45 mmHg y acidosis cuando el

pH < 7,35. Se deben considerar como contraindicaciones formales de la VMNI los trastornos del nivel de conciencia o somnolencia, alto riesgo de aspiración, malformaciones nasofaríngeas, uso de musculatura accesoria por disnea grave o inestabilidad cardiovascular.

El grupo elaborador considera que el seguimiento de los parámetros gasométricos antes y durante la VMNI es una buena práctica clínica.

Tabla 22.1. Resumen de conclusiones

|                       | Judgement                            |                                               |                                                          |                                         |                         |        |                               |
|-----------------------|--------------------------------------|-----------------------------------------------|----------------------------------------------------------|-----------------------------------------|-------------------------|--------|-------------------------------|
| Desirable effects     | Trivial                              | Small                                         | Moderate                                                 | Large                                   |                         | Varies | Don't know                    |
| Undesirable effects   | Large                                | Moderate                                      | Small                                                    | Trivial                                 |                         | Varies | Don't know                    |
| Certainty of evidence | Very low                             | Low                                           | Moderate                                                 | High                                    |                         |        | No included studies           |
| Values                | Important uncertainty or variability | Possibly important uncertainty or variability | Probably no important uncertainty or variability         | No important uncertainty or variability |                         |        | No known undesirable outcomes |
| Balance of effects    | Favors the comparison                | Probably favors the comparison                | Does not favor either the intervention or the comparison | Probably favors the intervention        | Favors the intervention | Varies | Don't know                    |
| Resources required    | Large costs                          | Moderate costs                                | Negligible costs and savings                             | Moderate savings                        | Large savings           | Varies | Don't know                    |
| Acceptability         | No                                   | Probably no                                   | Probably yes                                             | Yes                                     |                         | Varies | Don't know                    |
| Feasibility           | No                                   | Probably no                                   | Probably yes                                             | Yes                                     |                         | Varies | Don't know                    |

Tabla 22.2. Resumen de evidencias sobre la eficacia de la VNI en el tratamiento de las agudizaciones graves de la EPOC

| Quality assessment         |                   |                      |                      |              |                      |                      | N° of patients |                 | Effect                           |                                                            | Quality          | Importance |
|----------------------------|-------------------|----------------------|----------------------|--------------|----------------------|----------------------|----------------|-----------------|----------------------------------|------------------------------------------------------------|------------------|------------|
| N° of studies              | Study design      | Risk of bias         | Inconsistency        | Indirectness | Imprecision          | Other considerations | NIV            | Usual Care      | Relative (95% CI)                | Absolute (95% CI)                                          |                  |            |
| Need for intubation        |                   |                      |                      |              |                      |                      |                |                 |                                  |                                                            |                  |            |
| 20                         | randomised trials | serious <sup>1</sup> | not serious          | not serious  | not serious          | none                 | 80/664 (12.0%) | 205/670 (30.6%) | <b>RR 0.43</b><br>(0.35 to 0.53) | <b>174 fewer per 1000</b><br>(from 144 fewer to 199 fewer) | ⊕⊕⊕○<br>MODERATE | CRITICAL   |
| Mortality                  |                   |                      |                      |              |                      |                      |                |                 |                                  |                                                            |                  |            |
| 16                         | randomised trials | not serious          | not serious          | not serious  | not serious          | none                 | 41/575 (7.1%)  | 81/581 (13.9%)  | <b>RR 0.54</b><br>(0.38 to 0.76) | <b>64 fewer per 1000</b><br>(from 33 fewer to 86 fewer)    | ⊕⊕⊕⊕<br>HIGH     | CRITICAL   |
| Length of hospital stay    |                   |                      |                      |              |                      |                      |                |                 |                                  |                                                            |                  |            |
| 15                         | randomised trials | serious <sup>1</sup> | serious <sup>2</sup> | not serious  | not serious          | none                 | 577            | 582             | -                                | <b>MD 2.88 fewer</b><br>(4.59 fewer to 1.17 fewer)         | ⊕⊕○○<br>LOW      | IMPORTANT  |
| Length of ICU stay         |                   |                      |                      |              |                      |                      |                |                 |                                  |                                                            |                  |            |
| 3                          | randomised trials | serious <sup>1</sup> | not serious          | not serious  | serious <sup>3</sup> | none                 | 35             | 26              | -                                | <b>MD 4.99 fewer</b><br>(9.99 fewer to 0 )                 | ⊕⊕○○<br>LOW      | IMPORTANT  |
| Complications of treatment |                   |                      |                      |              |                      |                      |                |                 |                                  |                                                            |                  |            |
| 5                          | randomised trials | serious <sup>1</sup> | not serious          | not serious  | not serious          | none                 | 22/140 (15.7%) | 60/143 (42.0%)  | <b>RR 0.39</b><br>(0.26 to 0.59) | <b>256 fewer per 1000</b><br>(from 172 fewer to 310 fewer) | ⊕⊕⊕○<br>MODERATE | CRITICAL   |

CI: Confidence interval; RR: Risk ratio; MD: Mean difference.

<sup>1</sup> Not blinded studies that could have biased this subjective outcome.

<sup>2</sup> Large variability among effect estimates.

<sup>3</sup> Wide confidence intervals; the ends of the confidence interval would lead to different clinical decisions.

## Referencias

1. \*Ram FS, Picot J, Lightowler J, Wedzicha JA. Non-invasive positive pressure ventilation for treatment of respiratory failure due to exacerbations of chronic obstructive pulmonary disease. *Cochrane Database Syst Rev*. 2004;(1):CD004104.
2. \*\*Carrera M, Marín JM, Antón A, Chiner E, Alonso ML, Masa JF, et al. A controlled trial of noninvasive ventilation for chronic obstructive pulmonary disease exacerbations. *J Crit Care*. 2009;24:473-14.
3. \*\*Keenan SP, Powers CE, McCormack DG. Noninvasive positive-pressure ventilation in patients with milder chronic obstructive pulmonary disease exacerbations: a randomized controlled trial. *Respir Care*. 2005;50:610-6.
4. \*\*Pastaka C, Kostikas K, Karetsi E, Tsolaki V, Antoniadou I, Gourgoulialis KI. Non-invasive ventilation in chronic hypercapnic COPD patients with exacerbation and a pH of 7.35 or higher. *Eur J Intern Med*. 2007;18:524-30.
5. \*\*Schmidbauer W, Ahlers O, Spies C, Dreyer A, Mager G, Kerner T. Early prehospital use of non-invasive ventilation improves acute respiratory failure in acute exacerbation of chronic obstructive pulmonary disease. *Emerg Med J*. 2011;28:626-7.
6. \*\*Vargas F, Bui HN, Boyer A, Salmi LR, Gbikpi-Benissan G, Guenard H, et al. Intrapulmonary percussive ventilation in acute exacerbations of COPD patients with mild respiratory acidosis: a randomized controlled trial. *Crit Care*. 2005;9:R382-9.
7. \*\*Collaborative Research Group of Noninvasive Mechanical Ventilation for Chronic Obstructive Pulmonary Disease. Early use of non-invasive positive pressure ventilation for acute exacerbations of chronic obstructive pulmonary disease: A multicentre randomized controlled trial. *Chin Med J (Engl)*. 2005;118:2034-40.
8. \*\*Dhamija A, Tyagi P, Caroli R, Ur Rahman M, Vijayan VK. Noninvasive ventilation in mild to moderate cases of respiratory failure due to acute exacerbation of chronic obstructive pulmonary disease. *Saudi Med J*. 2005;26:887-90.

\*Revisión sistemática.

\*\*Ensayo clínico.
